# Supplementary material for: [4 + 2] Cycloaddition of trifluoromethyl ketimines with 2-alkenyl azaarenes through selective C–F bond cleavage of CF3
Source: Royal Society of Chemistry journal article supplement (doi:10.1039/d1qo00639h), 2021-01-01

## *Supporting Information*

# **[4+2] Cycloaddition of Trifluoromethyl Ketimines with 2-Alkenyl Azaarenes through Selective C-F Bond Cleavage of CF<sub>3</sub>**

Yiwei Fu,<sup>†§</sup> Cong Qin,<sup>†§</sup> Zhiqiang Wang,<sup>‡§</sup> Haoyu Shi,<sup>†</sup> Jianbo Zhao,<sup>†</sup> Lei Shi,<sup>†</sup>  
Xueqing Gong,<sup>‡\*</sup> Hao Li<sup>†\*</sup>

<sup>†</sup>*State Key Laboratory of Bioreactor Engineering, Shanghai Key Laboratory of New Drug Design, and School of Pharmacy, East China University of Science and Technology, 130 Mei-long Road, Shanghai 200237, China*

<sup>‡</sup>*Key Laboratory for Advanced Materials and Joint International Research Laboratory for Precision Chemistry and Molecular Engineering, Feringa Nobel Prize Scientist Joint Research Center, Centre for Computational Chemistry and Research Institute of Industrial Catalysis, School of Chemistry and Molecular Engineering, East China University of Science and Technology, 130 Meilong Road, Shanghai, 200237, China.*

<sup>||</sup>*Corporate R&D Division, Firmenich Aromatics (China) Co., Ltd., 3901 Jindu Road, Shanghai, 201108, China*

## **Table of contents**

|                                                                                                  |           |
|--------------------------------------------------------------------------------------------------|-----------|
| <b>1. General Information .....</b>                                                              | <b>2</b>  |
| <b>2. General Procedure for the preparation of Substrates .....</b>                              | <b>3</b>  |
| <b>3. Optimization of reaction conditions .....</b>                                              | <b>6</b>  |
| <b>4. General Procedure for the synthesis of Products 3 and their Characterization Data.....</b> | <b>8</b>  |
| <b>5. Mechanism Study .....</b>                                                                  | <b>31</b> |
| <b>6. Determination of X-ray crystallographic structure 3q.....</b>                              | <b>33</b> |
| <b>7. Reference.....</b>                                                                         | <b>42</b> |
| <b>8. <sup>1</sup>H, <sup>13</sup>C and <sup>19</sup>F NMR spectra .....</b>                     | <b>43</b> |

## 1. General Information

Unless otherwise noted, all reagents were obtained commercially and used without further purification. Unless otherwise specified, all other reagents were purchased from Acros, Aldrich, Fisher, Adamas-beta Co. Ltd. or TCI and used without further purification.  $^1\text{H}$  NMR spectra was recorded at 400 MHz,  $^{13}\text{C}$  NMR spectra was recorded at 100 MHz.  $^{19}\text{F}$  NMR spectra was recorded at 375 MHz.  $^1\text{H}$  NMR spectra was recorded with tetramethylsilane ( $\delta$  0.00 ppm) as internal reference;  $^{13}\text{C}$  NMR spectra was recorded with  $\text{CDCl}_3$  ( $\delta$  77.00 ppm) as internal reference. Chemical shifts were reported in parts per million (ppm,  $\delta$ ) downfield from tetramethylsilane. Proton coupling patterns are described as singlet (s), doublet (d), triplet (t), quartet (q), multiplet (m), and broad (br). Chromatography was carried out with silica gel (200-300 mesh) using mixtures of petroleum ether (b.p. 60-80 °C) and ethyl acetate as eluents. Mass spectrometry analysis was carried out using an electrospray spectrometer Waters Micromass Q-TOF premier Mass Spectrometer (Waters, Milford, MA, USA).

## 2. General Procedure for the Preparation of Substrates

### 2.1 Synthesis of Phenyl Trifluoromethyl Ketamine Derivatives

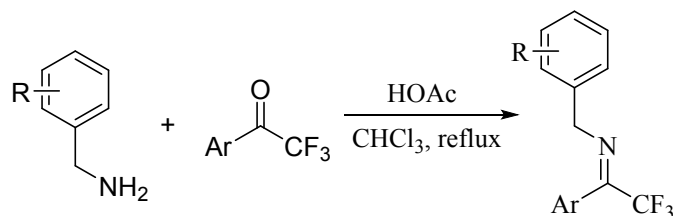

**Figure S1.** The synthesis of Phenyl Trifluoromethyl Ketamine Derivatives.

Benyl trifluoromethyl ketamine derivatives were synthesized according to the method reported in the literature.<sup>[1]</sup> To the mixture of benzyl amine (1.0 equiv) and acetic acid (1.0 equiv) in  $\text{CHCl}_3$  (1.0 mL/mmol) was added the solution of trifluoromethyl ketone (1.0 equiv) in  $\text{CHCl}_3$  (0.2 mL/mmol) in one portion. The resulting mixture was refluxed until all the ketone was consumed (indicated by TLC or by the disappearance of the insoluble solid). After cooling down to room temperature,  $\text{CH}_2\text{Cl}_2$  (4.0 mL/mmol) was added and the mixture was washed with  $\text{NaHCO}_3$  (sat., 2.0 mL/mmol). The aqueous layer was extracted with  $\text{CH}_2\text{Cl}_2$  (4.0 mL/mmol  $\times$  2). The organic phase was combined, washed with brine, dried over  $\text{Na}_2\text{SO}_4$  and concentrated. Then it could be used directly in the following reactions.

### 2.2 Synthesis of alkenes

#### General procedure A

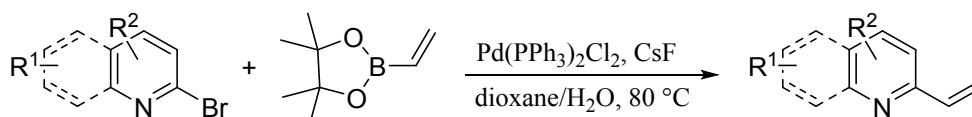

**Figure S2.** Synthesis of alkenylpyridines.

**2b-2i** were synthesized according to the method reported in the literature.<sup>[2]</sup> To a solution of bromide-substituted azaarene (10.0 mmol, 1.0 equiv), CsF (4.6 g, 30.0 mmol) and pinacol vinylboronate (2.3 g, 15.0 mmol) in dioxane/ $\text{H}_2\text{O}$  (20 mL/10 mL) was added  $\text{Pd}(\text{PPh}_3)_2\text{Cl}_2$  (0.7 g, 1.0 mmol). After stirring for 16 h at 80 °C under  $\text{N}_2$ , the

mixture was concentrated in vacuo. The crude product was further purified by column chromatography (petroleum ether/ethyl acetate = 40/1 - 10/1) on silica gel to yield the corresponding alkenylpyridines.

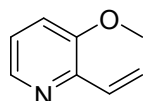

**3-Methoxy-2-vinylpyridine (2b)**, brown oil), purified by flash column chromatography (eluent: Petroleum ether/EtOAc = 16/1), 572 mg (53% yield). <sup>1</sup>H NMR (400 MHz, CDCl<sub>3</sub>): δ 8.18 (t, *J* = 3.0 Hz, 1H), 7.18 (dd, *J* = 17.6, 11.2 Hz, 1H), 7.14 (d, *J* = 2.8 Hz, 2H), 6.37 (dd, *J* = 17.2, 2.0 Hz, 1H), 5.47 (dd, *J* = 10.8, 2.0 Hz, 1H), 3.84 (s, 3H) ppm; <sup>13</sup>C NMR (100 MHz, CDCl<sub>3</sub>): δ 152.9, 145.2, 141.0, 130.8, 123.1, 118.6, 117.8, 55.4 ppm; HRMS (ESI) *m/z*: [M + H]<sup>+</sup> Calcd for C<sub>8</sub>H<sub>10</sub>NO 136.0762; Found 136.0763.

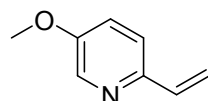

**5-Methoxy-2-vinylpyridine (2c)**, yellow oil), purified by flash column chromatography (eluent: Petroleum ether/EtOAc = 16/1), 788 mg (73% yield). <sup>1</sup>H NMR (400 MHz, CDCl<sub>3</sub>): δ 8.27 (d, *J* = 2.8 Hz, 1H), 7.29 (d, *J* = 8.8 Hz, 1H), 7.15 (dd, *J* = 8.6, 3.0 Hz, 1H), 6.77 (dd, *J* = 17.6, 10.8 Hz, 1H), 6.03 (d, *J* = 17.6 Hz, 1H), 5.35 (d, *J* = 11.2 Hz, 1H), 3.86 (s, 3H) ppm; <sup>13</sup>C NMR (100 MHz, CDCl<sub>3</sub>): δ 154.9, 148.7, 137.1, 136.3, 121.5, 120.7, 115.8, 55.6 ppm; HRMS (ESI) *m/z*: [M + H]<sup>+</sup> Calcd for C<sub>8</sub>H<sub>10</sub>NO 136.0762; Found 136.0763.

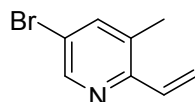

**5-Bromo-3-methyl-2-vinylpyridine (3i)**, brown oil), purified by flash column chromatography (eluent: Petroleum ether/EtOAc = 30/1), 1.0g (64% yield). <sup>1</sup>H NMR (400 MHz, CDCl<sub>3</sub>): δ 8.46 (d, *J* = 1.6 Hz, 1H), 7.57 (d, *J* = 1.6 Hz, 1H), 6.91 (dd, *J* = 16.8, 10.8 Hz, 1H), 6.35 (dd, *J* = 17.0, 1.8 Hz, 1H), 5.52 (dd, *J* = 10.6, 1.8 Hz, 1H), 2.33 (s, 3H) ppm; <sup>13</sup>C NMR (100 MHz, CDCl<sub>3</sub>): δ 152.1, 148.0, 140.2, 132.1, 132.1,

120.1, 119.0, 18.5 ppm; HRMS (ESI)  $m/z$ :  $[M + H]^+$  Calcd for  $C_8H_9BrN$  197.9918; Found 197.9919.

### General procedure B

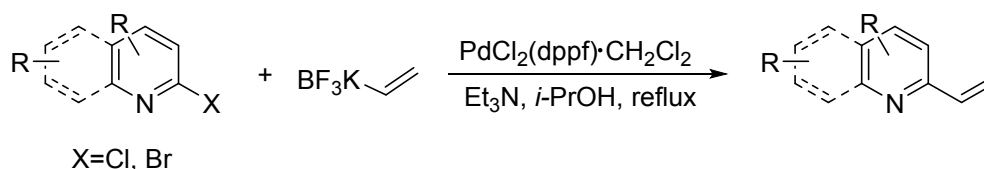

**Figure S3.** Synthesis of alkenylpyridines.

**2j-2o** were synthesized according to the method reported in the literature.<sup>[3]</sup> To a solution of chlorosubstituted azaarene (8.0 mmol, 1.0 equiv), potassium vinyltrifluoroborate (1.29 g, 9.6 mmol),  $PdCl_2(dppf) \cdot CH_2Cl_2$  (131 mg, 0.16 mmol), and  $Et_3N$  (1.12 mL, 8.0 mmol) in *i*-PrOH (125 mL) was heated to reflux for 16 h. The mixture was cooled to room temperature and partitioned between  $CH_2Cl_2$  (100 mL  $\times$  2) and  $H_2O$  (40 mL). The aqueous layer was separated and extracted with  $CH_2Cl_2$  (50 mL) and the combined organic layers were washed with brine (100 mL), dried ( $MgSO_4$ ), filtered, and concentrated in vacuo. Purification of the residue by column chromatography (petroleum ether/ethyl acetate = 40/1 - 10/1) gave the vinylpyridines

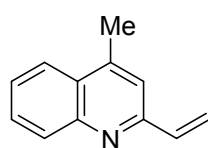

**4-Methyl-2-vinylquinoline (2n)**, brown oil, purified by flash column chromatography (eluent: Petroleum ether/EtOAc = 15/1), 865 mg (64% yield).  $^1H$  NMR (400 MHz,  $CDCl_3$ ):  $\delta$  8.06 (d,  $J = 8.4$  Hz, 1H), 7.94 (d,  $J = 8.0$  Hz, 1H), 7.68 (t,  $J = 7.6$  Hz, 1H), 7.51 (t,  $J = 7.6$  Hz, 1H), 7.43 (s, 1H), 7.00 (dd,  $J = 17.6, 10.8$  Hz, 1H), 6.26 (d,  $J = 17.6$  Hz, 1H), 5.64 (d,  $J = 10.8$  Hz, 1H), 2.69 (s, 3H) ppm;  $^{13}C$  NMR (100 MHz,  $CDCl_3$ ):  $\delta$  155.7, 147.8, 144.4, 138.1, 129.9, 129.3, 127.6, 126.1, 123.6, 119.6, 119.0, 18.9 ppm; HRMS (ESI)  $m/z$ :  $[M + H]^+$  Calcd for  $C_{12}H_{12}N$  170.0970; Found 170.0971.



### 3.2 Screening of additives in reaction<sup>a</sup>

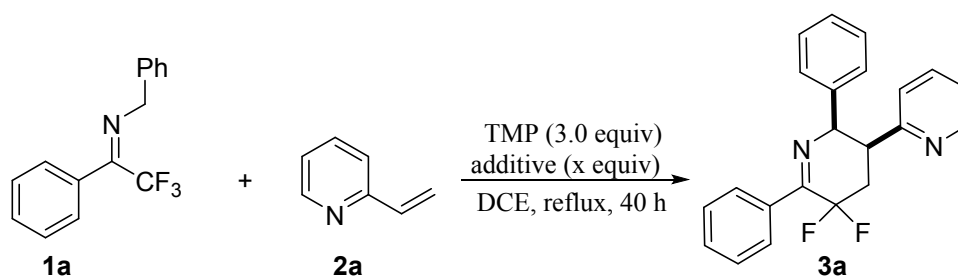

| entry           | additive                                        | yield(%) <sup>b</sup> |
|-----------------|-------------------------------------------------|-----------------------|
| 1 <sup>c</sup>  | Cu(OTf) <sub>2</sub>                            | 30 (33)               |
| 2 <sup>c</sup>  | Sc(OTf) <sub>3</sub>                            | 35 (32)               |
| 3 <sup>c</sup>  | Y(OTf) <sub>3</sub>                             | 34 (30)               |
| 4 <sup>c</sup>  | InCl <sub>3</sub>                               | 13 (31)               |
| 5 <sup>c</sup>  | BF <sub>3</sub>                                 | 12 (33)               |
| 6 <sup>c</sup>  | TfOH                                            | 23 (21)               |
| 7 <sup>d</sup>  | MeSi <sub>3</sub> -MeSi <sub>3</sub>            | 21 (27)               |
| 8 <sup>d</sup>  | Me <sub>3</sub> SiCF <sub>3</sub>               | 42 (31)               |
| 9 <sup>d</sup>  | Ph <sub>3</sub> SiH                             | 42 (33)               |
| 10 <sup>d</sup> | Et <sub>3</sub> SiH                             | 30 (28)               |
| 11 <sup>d</sup> | Me <sub>3</sub> SiCl                            | 34 (27)               |
| 12 <sup>c</sup> | (C <sub>6</sub> F <sub>5</sub> ) <sub>3</sub> B | 38 (28)               |
| 13 <sup>d</sup> | B(OMe) <sub>3</sub>                             | 35 (30)               |
| 14 <sup>d</sup> | B(O <sup>i</sup> Bu) <sub>3</sub>               | 42 (31)               |
| 15 <sup>d</sup> | HBPIn                                           | 20 (28)               |
| 16 <sup>d</sup> | PhMe <sub>2</sub> Si-BPin                       | 45 (30)               |

<sup>a</sup> Reaction conditions: unless specified otherwise, **1a** (0.6 mmol) was added to a mixture of **2a** (0.3 mmol) and TMP (0.6 mmol) in 1.0 mL of dry solvent. The solution was heated at reflux for 40 h. <sup>b</sup> Isolated yields. The yield of recovered **2a** was given in parenthesis. <sup>c</sup> 0.3 equiv additive was used. <sup>d</sup> 3.0 equiv additive was used.

### 3.3 Screening of solvents in reaction<sup>a</sup>

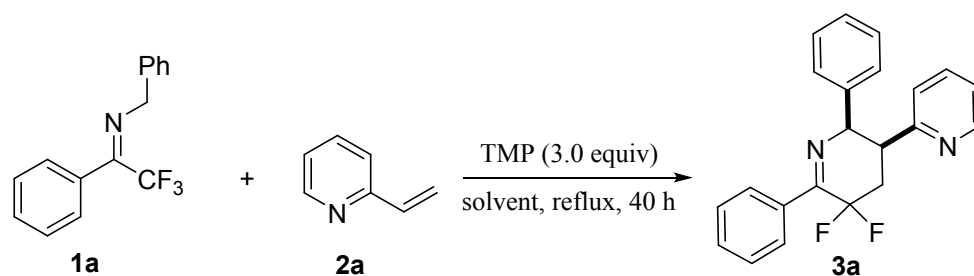

| entry           | solvent                      | yield(%) <sup>b</sup> |
|-----------------|------------------------------|-----------------------|
| 1               | <i>i</i> -PrOH               | trace                 |
| 2               | H <sub>2</sub> O             | N.R.                  |
| 3               | HFIP                         | 23 (23)               |
| 4               | THF                          | trace                 |
| 5               | acetone                      | trace                 |
| 6               | CHCl <sub>3</sub>            | trace                 |
| 7               | DMSO                         | N.R.                  |
| 8               | DMA                          | N.R.                  |
| 9               | PhCl                         | 33 (30)               |
| 10              | PhCF <sub>3</sub>            | 40 (26)               |
| 11              | <i>p</i> -xylene             | 32 (30)               |
| 12              | hexafluorobenze              | 35 (27)               |
| 13              | DCE: PhCF <sub>3</sub> = 1:1 | 32 (30)               |
| 14 <sup>c</sup> | DCE                          | 45 (34)               |

<sup>a</sup> Reaction conditions: unless specified otherwise, **1a** (0.6 mmol) was added to a mixture of **2a** (0.2 mmol) and TMP (0.6 mmol) in 1.0 mL of dry solvent. The solution was heated at reflux for 40 h. <sup>b</sup> Isolated yields. The yield of recovered **2a** was given in parenthesis. <sup>c</sup> The reaction was stirred under reflux conditions.

## 4. General Procedure for the synthesis of Products 3 and their Characterization Data.

### 4.1 General Procedure for the Synthesis of Products (3a as an example).

To a solution of **1a** (0.6 mmol, 157.8 mg) in 1.0 mL dry 1,2-Dichloroethane was added 2,2,6,6-tetramethylpiperidine (0.6 mmol, 84.8 mg). Then **2a** (0.2 mmol, 21 mg) was added dropwise to the solution under N<sub>2</sub>. The mixture was moved to 85 °C oil bath and



refluxed for 40 h. After completion of the reaction, the solution was cooled to room temperature, H<sub>2</sub>O (1 mL) was added. Then the mixture was extract with ethyl acetate (5 mL) for three times. After washed in brine and dried over Na<sub>2</sub>SO<sub>4</sub>, the combined organic phases was under reduced pressure and the residue was purified by flash chromatography (Petroleum ether/EtOAc = 13/1 to 10/1) to give the desired product **3a** as yellow oil (31 mg, 45 % yield).

#### 4.2 Characterization Data for Products.

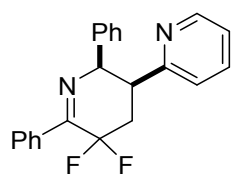

**5',5'-Difluoro-2',6'-diphenyl-2',3',4',5'-tetrahydro-2,3'-bipyridine (3a, yellow oil)**, purified by flash column chromatography (eluent: Petroleum ether/EtOAc = 13/1), 31 mg (45% yield). <sup>1</sup>H NMR (400 MHz, CDCl<sub>3</sub>): δ 8.49 (d, *J* = 4.2 Hz, 1H), 8.07 (d, *J* = 7.2 Hz, 2H), 7.52 – 7.49 (m, 2H), 7.45 (t, *J* = 7.2 Hz, 2H), 7.16 – 7.12 (m, 2H), 7.09 (t, *J* = 7.2 Hz, 2H), 6.71 (d, *J* = 7.8 Hz, 1H), 6.57 (d, *J* = 7.8 Hz, 2H), 5.80 (t, *J* = 5.6 Hz, 1H), 3.99 – 3.96 (m, 1H), 2.71 – 2.60 (m, 1H), 2.55 – 2.49 (m, 1H) ppm; <sup>13</sup>C NMR (100 MHz, CDCl<sub>3</sub>): δ 160.6 (dd, *J* = 29.0, 24.9 Hz), 158.7, 149.1, 136.2, 134.5 (d, *J* = 1.7 Hz), 133.8, 130.7, 128.5, 128.3, 128.3, 127.8, 127.4, 122.1, 122.0, 115.8 (dd, *J* = 248.3, 245.3 Hz), 66.6, 43.1 (d, *J* = 8.1 Hz), 30.4 (t, *J* = 23.4 Hz) ppm; <sup>19</sup>F NMR (375 MHz, CDCl<sub>3</sub>) δ – 88.25 (dddd, *J* = 287.6, 30.4, 20.3, 6.0 Hz, 1F), – 97.91 (dd, *J* = 287.7, 9.4 Hz, 1F) ppm; HRMS (ESI) *m/z*: [M + H]<sup>+</sup> Calcd for C<sub>22</sub>H<sub>19</sub>F<sub>2</sub>N<sub>2</sub> 349.1516; Found 349.1517.

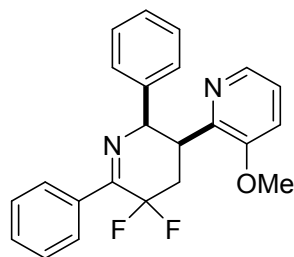

**5',5'-Difluoro-3-methoxy-2',6'-diphenyl-2',3',4',5'-tetrahydro-2,3'-bipyridine (3b,** yellow solid), purified by flash column chromatography (eluent: Petroleum ether/EtOAc = 13/1), 45 mg (60% yield). Mp 117 - 120 °C. <sup>1</sup>H NMR (400 MHz, CDCl<sub>3</sub>) δ 8.09 (d, *J* = 7.2 Hz, 2H), 7.84 (d, *J* = 3.6 Hz, 1H), 7.49 – 7.43 (m, 3H), 7.18 – 7.05 (m, 5H), 6.56 (d, *J* = 6.8 Hz, 2H), 5.95 (t, *J* = 5.6 Hz, 1H), 4.29 – 4.24 (m, 1H), 3.95 (s, 1H), 2.87 – 2.69 (m, 1H), 2.50 – 2.42 (m, 1H) ppm; <sup>13</sup>C NMR (100 MHz, CDCl<sub>3</sub>) δ 160.7 (dd, *J* = 29.5, 24.9 Hz), 153.8, 148.2, 140.5, 135.2 (d, *J* = 2.7 Hz), 134.0 (t, *J* = 2.6 Hz), 130.6, 128.5, 128.3, 128.0, 127.7, 127.2, 122.4, 116.4, 116.3 (dd, *J* = 248.4, 244.0 Hz), 63.6, 55.4, 37.8 (d, *J* = 8.8 Hz), 30.0 (t, *J* = 23.4 Hz) ppm; <sup>19</sup>F NMR (375 MHz, CDCl<sub>3</sub>) δ – 88.49 (dddd, *J* = 286.9, 32.3, 20.3, 6.0 Hz, 1F), – 98.76 (dd, *J* = 286.9, 9.4 Hz, 1F) ppm; HRMS (ESI) *m/z*: [M + H]<sup>+</sup> Calcd for C<sub>23</sub>H<sub>21</sub>F<sub>2</sub>N<sub>2</sub>O 379.1622; Found 379.1621.

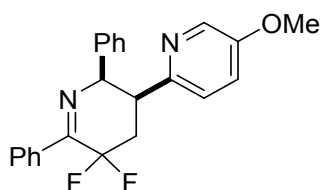

**5',5'-Difluoro-4-methyl-2',6'-diphenyl-2',3',4',5'-tetrahydro-2,3'-bipyridine (3c,** yellow oil), purified by flash column chromatography (eluent: Petroleum ether/EtOAc = 15/1), 38 mg (51% yield). <sup>1</sup>H NMR (400 MHz, CDCl<sub>3</sub>): δ 8.01 (d, *J* = 7.2 Hz, 2H), 7.44 – 7.32 (m, 4H), 7.11 – 7.01 (m, 3H), 6.53 (d, *J* = 7.2 Hz, 2H), 6.47 (d, *J* = 8.4 Hz, 1H), 6.40 (d, *J* = 7.2 Hz, 1H), 5.73 (t, *J* = 5.6 Hz, 1H), 3.78 – 3.72 (m, 1H), 3.52 (s, 3H), 2.71 – 2.54 (m, 1H), 2.43 – 2.34 (m, 1H) ppm; <sup>13</sup>C NMR (100 MHz, CDCl<sub>3</sub>): δ 162.3, 159.5 (dd, *J* = 29.3, 25.4 Hz), 155.1, 137.6, 133.8 (d, *J* = 2.8 Hz), 132.8 (t, *J* = 2.8 Hz), 129.6, 127.5 (t, *J* = 2.2 Hz), 127.3, 126.7, 126.2, 115.0 (dd, *J* = 248.6, 244.5 Hz), 113.8, 107.9, 65.7, 52.0, 41.7 (d, *J* = 8.0 Hz), 29.5 (t, *J* = 23.3 Hz) ppm; <sup>19</sup>F NMR (375 MHz, CDCl<sub>3</sub>) δ – 87.75 (d, *J* = 287.6 Hz, 1F), – 97.71 (d, *J* = 287.6 Hz, 1F) ppm; HRMS (ESI) *m/z*: [M + H]<sup>+</sup> Calcd for C<sub>23</sub>H<sub>21</sub>F<sub>2</sub>N<sub>2</sub>O 379.1622; Found 379.1620.

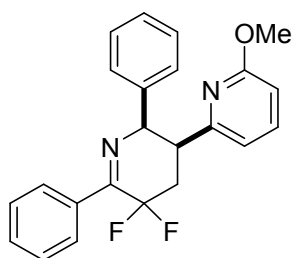

**5',5'-Difluoro-6-methoxy-2',6'-diphenyl-2',3',4',5'-tetrahydro-2,3'-bipyridine (3d,** yellow oil), purified by flash column chromatography (eluent: Petroleum ether/EtOAc = 15/1), 35 mg (47% yield).  $^1\text{H}$  NMR (400 MHz,  $\text{CDCl}_3$ )  $\delta$  8.08 (d,  $J = 7.6$  Hz, 2H), 7.50 – 7.40 (m, 4H), 7.18 – 7.09 (m, 3H), 6.60 (d,  $J = 7.2$  Hz, 2H), 6.54 (d,  $J = 8.4$  Hz, 1H), 6.48 (d,  $J = 7.2$  Hz, 1H), 5.73 (t,  $J = 5.6$  Hz, 1H), 3.84 – 3.80 (m, 1H), 3.60 (s, 3H), 2.78 – 2.61 (m, 1H), 2.51 – 2.41 (m, 1H) ppm;  $^{13}\text{C}$  NMR (100 MHz,  $\text{CDCl}_3$ )  $\delta$  163.3, 160.6 (dd,  $J = 29.2, 25.0$  Hz), 156.2, 138.6, 134.9 (d,  $J = 2.8$  Hz), 133.9 (t,  $J = 2.8$  Hz), 130.7, 128.5 (t,  $J = 2.2$  Hz), 128.3, 127.7, 127.3, 116.0 (dd,  $J = 249.2, 244.1$  Hz), 114.8, 108.9, 66.8, 53.0, 42.7 (d,  $J = 8.1$  Hz), 30.6 (t,  $J = 23.6$  Hz) ppm;  $^{19}\text{F}$  NMR (375 MHz,  $\text{CDCl}_3$ )  $\delta$  – 87.76 (dddd,  $J = 287.6, 30.8, 20.6, 6.0$  Hz, 1F), – 97.72 (dd,  $J = 287.8, 9.8$  Hz, 1F) ppm; HRMS (ESI)  $m/z$ :  $[\text{M} + \text{H}]^+$  Calcd for  $\text{C}_{23}\text{H}_{21}\text{F}_2\text{N}_2\text{O}$  379.1622; Found 379.1623.

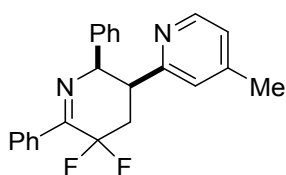

**5',5'-Difluoro-5-methoxy-2',6'-diphenyl-2',3',4',5'-tetrahydro-2,3'-bipyridine (3e,** yellow oil), purified by flash column chromatography (eluent: Petroleum ether/EtOAc = 15/1), 34 mg (47% yield).  $^1\text{H}$  NMR (400 MHz,  $\text{CDCl}_3$ ):  $\delta$  8.27 (d,  $J = 4.8$  Hz, 1H), 8.00 (d,  $J = 7.2$  Hz, 2H), 7.45 – 7.36 (m, 3H), 7.10 – 7.01 (m, 3H), 6.88 (d,  $J = 4.4$  Hz, 1H), 6.49 (d,  $J = 7.2$  Hz, 2H), 6.42 (s, 1H), 5.71 (t,  $J = 5.6$  Hz, 1H), 3.88 – 3.83 (m, 1H), 2.64 – 2.38 (m, 2H), 2.14 (s, 3H) ppm;  $^{13}\text{C}$  NMR (100 MHz,  $\text{CDCl}_3$ ):  $\delta$  160.6 (dd,  $J = 29.1, 24.7$  Hz), 158.5, 148.8, 147.4, 134.6 (d,  $J = 2.8$  Hz), 133.8 (t,  $J = 2.8$  Hz),

130.7, 128.5 (t,  $J = 2.2$  Hz), 128.3, 127.7, 127.4, 123.1, 123.0, 115.9 (dd,  $J = 248.7$ , 244.9 Hz), 66.6, 43.0 (d,  $J = 7.8$  Hz), 30.5 (t,  $J = 23.6$  Hz), 21.0 ppm;  $^{19}\text{F}$  NMR (375 MHz,  $\text{CDCl}_3$ )  $\delta$  - 88.23 (d,  $J = 287.6$  Hz, 1F), - 97.98 (d,  $J = 287.3$  Hz, 1F) ppm; HRMS (ESI)  $m/z$ :  $[\text{M} + \text{H}]^+$  Calcd for  $\text{C}_{23}\text{H}_{21}\text{F}_2\text{N}_2\text{O}$  363.1673; Found 363.1672.

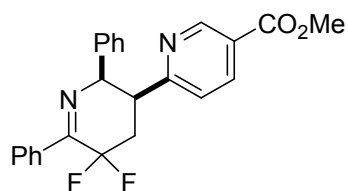

**Methyl-5',5'-difluoro-2',6'-diphenyl-2',3',4',5'-tetrahydro-[2,3'-bipyridine]-5-carboxylate (3f, brown oil)**, purified by flash column chromatography (eluent: Petroleum ether/EtOAc = 17/1), 34 mg (43% yield).  $^1\text{H}$  NMR (400 MHz,  $\text{CDCl}_3$ ):  $\delta$  9.09 (d,  $J = 2.0$  Hz, 1H), 8.11 (dd,  $J = 8.4$ , 2.4 Hz, 1H), 8.07 (d,  $J = 7.6$  Hz, 2H), 7.51 – 7.44 (m, 4H), 7.16 (t,  $J = 7.6$  Hz, 1H), 7.10 (t,  $J = 7.6$  Hz, 2H), 6.80 (d,  $J = 8.0$  Hz, 1H), 6.57 (d,  $J = 7.6$  Hz, 2H), 5.82 (t,  $J = 5.6$  Hz, 1H), 4.07 – 4.02 (m, 1H), 3.95 (s, 3H), 2.79 – 2.64 (m, 1H), 2.59 – 2.50 (m, 1H) ppm;  $^{13}\text{C}$  NMR (100 MHz,  $\text{CDCl}_3$ ):  $\delta$  165.7, 163.2, 160.6 (dd,  $J = 29.1$ , 24.9 Hz), 150.4, 137.3, 134.2 (d,  $J = 2.5$  Hz), 133.6 (t,  $J = 2.6$  Hz), 130.8, 128.5, 128.4, 128.2, 128.0, 127.7, 124.4, 121.6, 115.6 (dd,  $J = 248.4$ , 245.1 Hz), 66.3, 52.5, 43.4 (d,  $J = 8.1$  Hz), 30.4 (t,  $J = 23.8$  Hz) ppm;  $^{19}\text{F}$  NMR (375 MHz,  $\text{CDCl}_3$ )  $\delta$  - 88.23 (d,  $J = 288.4$  Hz, 1F), - 98.03 (d,  $J = 288.4$  Hz, 1F) ppm; HRMS (ESI)  $m/z$ :  $[\text{M} + \text{H}]^+$  Calcd for  $\text{C}_{24}\text{H}_{21}\text{F}_2\text{N}_2\text{O}_2$  407.1571; Found 407.1572.

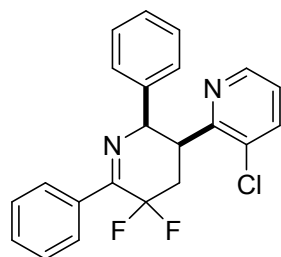

**3-Chloro-5',5'-difluoro-2',6'-diphenyl-2',3',4',5'-tetrahydro-2,3'-bipyridine (3g,**

yellow solid), purified by flash column chromatography (eluent: Petroleum ether/EtOAc = 15/1), 39 mg (56% yield). Mp 134 - 135 °C. <sup>1</sup>H NMR (400 MHz, CDCl<sub>3</sub>) δ 8.10 – 8.07 (m, 3H), 7.72 (dd, *J* = 8.0, 1.2 Hz, 2H), 7.52 – 7.44 (m, 3H), 7.16 – 7.04 (m, 3H), 6.60 (d, *J* = 7.2 Hz, 2H), 6.03 (t, *J* = 5.6 Hz, 1H), 4.37 – 4.32 (m, 1H), 2.94 – 2.77 (m, 1H), 2.49 – 2.40 (m, 1H) ppm; <sup>13</sup>C NMR (100 MHz, CDCl<sub>3</sub>) δ 160.7 (dd, *J* = 29.3, 25.1 Hz), 155.3, 147.0, 136.7, 134.9 (d, *J* = 2.8 Hz), 133.7 (t, *J* = 2.7 Hz), 131.6, 130.7, 128.5 (t, *J* = 2.1 Hz), 128.3, 127.9, 127.9, 127.5, 122.8, 116.2 (dd, *J* = 248.0, 244.2 Hz), 63.1, 39.9 (d, *J* = 8.8 Hz), 30.3 (t, *J* = 23.4 Hz) ppm; <sup>19</sup>F NMR (375 MHz, CDCl<sub>3</sub>) δ – 88.54 (dddd, *J* = 287.6, 32.6, 19.5, 6.0 Hz, 1F), – 99.00 (dd, *J* = 287.8, 9.0 Hz, 1F) ppm; HRMS (ESI) *m/z*: [M + H]<sup>+</sup> Calcd for C<sub>22</sub>H<sub>18</sub>ClF<sub>2</sub>N<sub>2</sub> 383.1127; Found 383.1126.

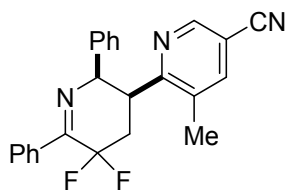

**5',5'-Difluoro-3-methyl-2',6'-diphenyl-2',3',4',5'-tetrahydro-[2,3'-bipyridine]-5-carbonitrile (3h)**, yellow solid), purified by flash column chromatography (eluent: Petroleum ether/EtOAc = 14/1), 49mg (64% yield). Mp 113 – 114 °C. <sup>1</sup>H NMR (400 MHz, CDCl<sub>3</sub>): δ 8.28 (d, *J* = 1.2 Hz, 1H), 8.07 (d, *J* = 7.2 Hz, 2H), 7.75 (s, 1H), 7.53 – 7.44 (m, 3H), 7.19 (t, *J* = 7.2 Hz, 1H), 7.11 (t, *J* = 7.2 Hz, 2H), 6.50 (d, *J* = 7.2 Hz, 2H), 5.74 (t, *J* = 5.6 Hz, 1H), 4.15 – 4.10 (m, 1H), 3.00 – 2.82 (m, 1H), 2.62 (s, 3H), 2.46 – 2.37 (m, 1H) ppm; <sup>13</sup>C NMR (100 MHz, CDCl<sub>3</sub>): δ 160.0 (dd, *J* = 29.1, 25.1 Hz), 160.0, 148.0, 139.2, 133.2 (d, *J* = 2.7 Hz), 132.4 (t, *J* = 2.7 Hz), 131.0, 129.9, 127.5 (t, *J* = 2.0 Hz), 127.4, 127.0, 126.8, 126.8, 115.7, 114.9 (dd, *J* = 249.1, 243.3 Hz), 106.8, 62.5, 39.4 (d, *J* = 8.6 Hz), 29.6 (t, *J* = 23.6 Hz), 17.2 ppm; <sup>19</sup>F NMR (375 MHz, CDCl<sub>3</sub>) δ – 88.28 (d, *J* = 288.8 Hz, 1F), – 98.95 (d, *J* = 288.8 Hz, 1F) ppm; HRMS (ESI) *m/z*: [M + H]<sup>+</sup> Calcd for C<sub>24</sub>H<sub>20</sub>F<sub>2</sub>N<sub>2</sub> 388.1625; Found 388.1624.

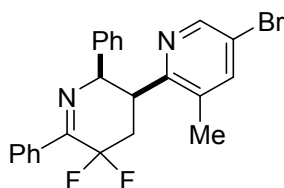

**5-Bromo-5',5'-difluoro-3-methyl-2',6'-diphenyl-2',3',4',5'-tetrahydro-2,3'-bipyridine (3i)**, yellow oil), purified by flash column chromatography (eluent: Petroleum ether/EtOAc = 14/1), 46 mg (53% yield).  $^1\text{H}$  NMR (400 MHz,  $\text{CDCl}_3$ ):  $\delta$  8.01–8.00 (m, 3H), 7.56 (d,  $J = 2.0$  Hz, 1H), 7.44 – 7.35 (m, 3H), 7.10 (t,  $J = 7.2$  Hz, 1H), 7.04 (t,  $J = 7.2$  Hz, 1H), 6.44 (d,  $J = 7.2$  Hz, 2H), 5.64 (t,  $J = 5.6$  Hz, 1H), 3.95 – 3.91 (m, 1H), 2.86 – 2.68 (m, 1H), 2.46 (s, 3H), 2.36 – 2.27 (m, 1H) ppm;  $^{13}\text{C}$  NMR (100 MHz,  $\text{CDCl}_3$ ):  $\delta$  159.9 (dd,  $J = 29.5, 25.1$  Hz), 153.9, 146.4, 138.9, 133.5 (d,  $J = 2.8$  Hz), 132.6 (t,  $J = 2.7$  Hz), 132.1, 129.8, 127.4, 127.3, 127.0, 126.9, 126.5, 117.7, 115.2 (dd,  $J = 249.1, 243.4$  Hz), 62.8, 38.7 (d,  $J = 8.6$  Hz), 29.7 (t,  $J = 23.6$  Hz), 17.2 ppm;  $^{19}\text{F}$  NMR (375 MHz,  $\text{CDCl}_3$ )  $\delta$  – 88.22 (d,  $J = 288.0$  Hz, 1F), – 98.73 (d,  $J = 288.0$  Hz, 1F) ppm; HRMS (ESI)  $m/z$ :  $[\text{M} + \text{H}]^+$  Calcd for  $\text{C}_{23}\text{H}_{20}\text{BrF}_2\text{N}_2$  441.0778; Found 441.0775.

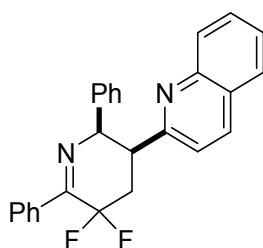

**2-(5,5-Difluoro-2,6-diphenyl-2,3,4,5-tetrahydropyridin-3-yl)quinoline (3j)**, brown oil), purified by flash column chromatography (eluent: Petroleum ether/EtOAc = 15/1), 38 mg (48% yield).  $^1\text{H}$  NMR (400 MHz,  $\text{CDCl}_3$ ):  $\delta$  8.10 (d,  $J = 7.6$  Hz, 2H), 7.96 (dd,  $J = 14.4, 8.4$  Hz, 2H), 7.76 (d,  $J = 87.8$  Hz, 1H), 7.70 (t,  $J = 7.2$  Hz, 1H), 7.51 (dd,  $J = 13.8, 7.2$  Hz, 2H), 7.47 (t,  $J = 7.2$  Hz, 2H), 7.11 (t,  $J = 7.2$  Hz, 1H), 7.03 (t,  $J = 7.2$  Hz, 2H), 6.78 (d,  $J = 8.4$  Hz, 1H), 6.58 (d,  $J = 7.8$  Hz, 2H), 5.90 (t,  $J = 5.6$  Hz, 1H), 4.17 –

4.15 (m, 1H), 2.87 – 2.75 (m, 1H), 2.68 – 2.61 (m, 1H) ppm;  $^{13}\text{C}$  NMR (100 MHz,  $\text{CDCl}_3$ ):  $\delta$  160.7 (dd,  $J = 29.1, 25.7$  Hz), 158.9, 147.7, 136.1, 134.6 (d,  $J = 1.7$  Hz), 133.8, 130.7, 129.6, 129.2, 128.5, 128.4, 128.3, 127.8, 127.5, 127.5, 127.0, 126.3, 119.9, 115.8 (dd,  $J = 248.8, 245.0$  Hz), 66.4, 44.1 (d,  $J = 8.0$  Hz), 30.8 (t,  $J = 23.8$  Hz) ppm;  $^{19}\text{F}$  NMR (375 MHz,  $\text{CDCl}_3$ )  $\delta$  – 88.54 (dddd,  $J = 287.6, 31.1, 20.6, 6.8$ , 1F), – 97.76 (dd,  $J = 287.6, 11.3$  Hz, 1F) ppm; HRMS (ESI)  $m/z$ :  $[\text{M} + \text{H}]^+$  Calcd for  $\text{C}_{26}\text{H}_{21}\text{F}_2\text{N}_2$  399.1673; Found 399.1674.

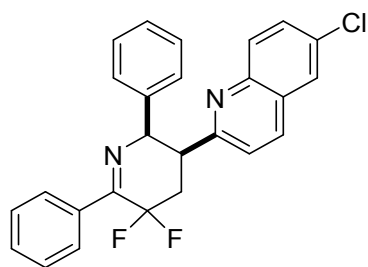

**6-Chloro-2-(5,5-difluoro-2,6-diphenyl-2,3,4,5-tetrahydropyridin-3-yl)quinoline**

(**3k**, brown solid), purified by flash column chromatography (eluent: Petroleum ether/EtOAc = 15/1), 43.2 mg (50% yield). Mp 123 – 124 °C.  $^1\text{H}$  NMR (400 MHz,  $\text{CDCl}_3$ )  $\delta$  8.08 (d,  $J = 7.6$  Hz, 2H), 7.88 (dd,  $J = 8.8, 5.6$  Hz, 2H), 7.74 (d,  $J = 2.0$  Hz, 1H), 7.61 (dd,  $J = 8.8, 2.4$  Hz, 1H), 7.51 – 7.44 (m, 3H), 7.11 (t,  $J = 7.2$  Hz, 1H), 7.02 (t,  $J = 7.2$  Hz, 2H), 6.84 (d,  $J = 8.4$  Hz, 1H), 6.57 (d,  $J = 7.2$  Hz, 2H), 5.86 (t,  $J = 5.6$  Hz, 1H), 4.15 – 4.11 (m, 1H), 2.89 – 2.72 (m, 1H), 2.68 – 2.59 (m, 1H) ppm;  $^{13}\text{C}$  NMR (100 MHz,  $\text{CDCl}_3$ )  $\delta$  160.7 (dd,  $J = 29.5, 25.2$  Hz), 159.2, 146.0, 135.2, 134.5 (d,  $J = 2.6$  Hz), 133.8 (t,  $J = 2.6$  Hz), 132.1, 130.8, 130.6, 128.5, 128.4, 128.3, 127.9, 127.6, 127.5, 126.2, 120.9, 115.7 (dd,  $J = 248.9, 245.0$  Hz), 66.3, 44.0 (d,  $J = 8.0$  Hz), 30.7 (t,  $J = 23.7$  Hz) ppm;  $^{19}\text{F}$  NMR (375 MHz,  $\text{CDCl}_3$ )  $\delta$  – 88.13 (dddd,  $J = 287.8, 30.0, 20.3, 6.0$  Hz, 1F), – 98.29 (dd,  $J = 288.0, 9.7$  Hz, 1F) ppm; HRMS (ESI)  $m/z$ :  $[\text{M} + \text{H}]^+$  Calcd for  $\text{C}_{26}\text{H}_{20}\text{ClF}_2\text{N}_2$  433.1283; Found 433.1284.

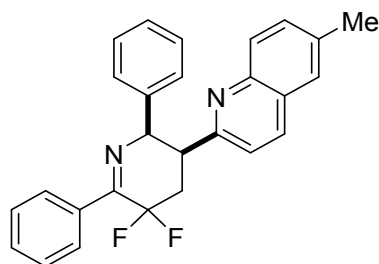

**2-(5,5-Difluoro-2,6-diphenyl-2,3,4,5-tetrahydropyridin-3-yl)-6-methylquinoline**

(**3l**, yellow oil), purified by flash column chromatography (eluent: Petroleum ether/EtOAc = 15/1), 44 mg (54% yield). <sup>1</sup>H NMR (400 MHz, CDCl<sub>3</sub>) δ 8.09 (d, *J* = 7.6 Hz, 2H), 7.86 (dd, *J* = 10.8, 9.2 Hz, 2H), 7.53 – 7.44 (m, 5H), 7.11 (t, *J* = 7.2 Hz, 1H), 7.02 (t, *J* = 7.2 Hz, 2H), 6.71 (d, *J* = 8.4 Hz, 1H), 6.57 (d, *J* = 7.2 Hz, 2H), 5.89 (t, *J* = 5.6 Hz, 1H), 4.15 – 4.11 (m, 1H), 2.88 – 2.72 (m, 1H), 2.67 – 2.59 (m, 1H), 2.53 (s, 3H) ppm; <sup>13</sup>C NMR (100 MHz, CDCl<sub>3</sub>) δ 160.7 (dd, *J* = 29.4, 25.3 Hz), 157.9, 146.2, 136.2, 135.5, 134.6 (d, *J* = 2.8 Hz), 133.9 (t, *J* = 2.7 Hz), 132.0, 130.7, 128.8, 128.6, 128.4, 128.3, 127.8, 127.4, 127.0, 126.4, 119.9, 115.8 (dd, *J* = 248.9, 244.9 Hz), 66.4, 44.0 (d, *J* = 7.9 Hz), 30.8 (t, *J* = 23.5 Hz), 21.6 ppm; <sup>19</sup>F NMR (375 MHz, CDCl<sub>3</sub>) δ – 88.21 (dddd, *J* = 287.4, 30.0, 20.3, 6.0 Hz, 1F), – 97.74 (dd, *J* = 287.4, 9.4 Hz, 1F) ppm; HRMS (ESI) *m/z*: [M + H]<sup>+</sup> Calcd for C<sub>27</sub>H<sub>23</sub>F<sub>2</sub>N<sub>2</sub> 413.1829; Found 413.1828.

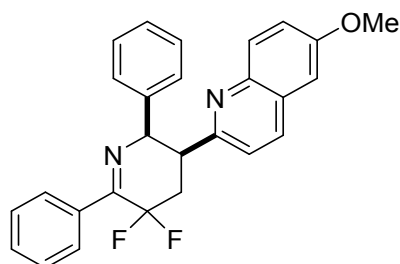

**2-(5,5-Difluoro-2,6-diphenyl-2,3,4,5-tetrahydropyridin-3-yl)-6-methoxyquinoline**

(**3m**, yellow oil), purified by flash column chromatography (eluent: Petroleum ether/EtOAc = 12/1), 47 mg (54 % yield). <sup>1</sup>H NMR (400 MHz, CDCl<sub>3</sub>) δ 8.09 (d, *J* = 7.8 Hz, 2H), 7.85 (dd, *J* = 20.4, 9.6 Hz, 2H), 7.51 (t, *J* = 7.2 Hz, 1H), 7.46 (t, *J* = 7.2 Hz, 2H), 7.35 (dd, *J* = 9.0, 2.4 Hz, 1H), 7.05 – 7.02 (m, 3H), 6.71 (d, *J* = 8.4 Hz 1H), 6.57 (d, *J* = 7.8 Hz, 2H), 5.87 (t, *J* = 5.6 Hz, 1H), 4.13 – 4.11 (m, 1H), 3.93 (s, 3H), 2.83 – 2.71 (m, 1H), 2.65 – 2.60 (m, 1H) ppm; <sup>13</sup>C NMR (100 MHz, CDCl<sub>3</sub>) δ 160.6



(dd,  $J = 28.8, 24.9$  Hz), 157.6, 156.3, 143.8, 134.8, 134.7 (d,  $J = 2.1$  Hz), 133.9, 130.7, 130.6, 128.5, 128.4, 128.3, 127.9, 127.8, 127.4, 122.3, 120.1, 115.8 (dd,  $J = 248.7, 245.2$  Hz), 104.9, 66.5, 55.5, 43.8 (d,  $J = 7.9$  Hz), 30.8 (t,  $J = 23.6$  Hz) ppm;  $^{19}\text{F}$  NMR (375 MHz,  $\text{CDCl}_3$ )  $\delta$  - 88.22 (dddd,  $J = 287.4, 30.0, 20.3, 6.0$  Hz, 1F), - 97.68 (dd,  $J = 287.4, 9.4$  Hz, 1F) ppm; HRMS (ESI)  $m/z$ :  $[\text{M} + \text{H}]^+$  Calcd for  $\text{C}_{27}\text{H}_{23}\text{F}_2\text{N}_2\text{O}$  429.1778; Found 429.1777.

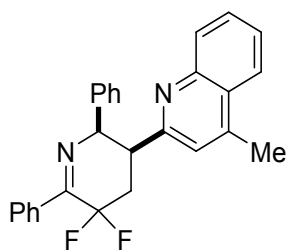

**2-(5,5-Difluoro-2,6-diphenyl-2,3,4,5-tetrahydropyridin-3-yl)-4-methylquinoline**

(**3n**, yellow oil), purified by flash column chromatography (eluent: Petroleum ether/EtOAc = 15/1), 42 mg (51% yield).  $^1\text{H}$  NMR (400 MHz,  $\text{CDCl}_3$ ):  $\delta$  8.02 (d,  $J = 7.6$  Hz, 2H), 7.88 (dd,  $J = 17.2, 8.4$  Hz, 2H), 7.61 (t,  $J = 7.2$  Hz 1H), 7.48 – 7.37 (m, 4H), 7.04 (t,  $J = 7.2$  Hz, 1H), 6.96 (t,  $J = 7.2$  Hz, 2H), 6.51 (s, 1H), 6.49 (d,  $J = 5.6$  Hz, 2H), 5.80 (t,  $J = 5.6$  Hz, 1H), 4.05 – 4.00 (m, 1H), 2.79 – 2.62 (m, 1H), 2.59 – 2.50 (m, 1H), 2.46 (s, 3H) ppm;  $^{13}\text{C}$  NMR (100 MHz,  $\text{CDCl}_3$ ):  $\delta$  160.7 (dd,  $J = 29.0, 25.1$  Hz), 158.5, 147.4, 144.3, 134.7 (d,  $J = 2.7$  Hz), 133.9, 130.7, 129.7, 129.3, 128.6 (t,  $J = 2.0$  Hz), 128.4, 128.3, 127.8, 127.4, 127.0, 126.1, 123.6, 120.8, 115.8 (dd,  $J = 248.8, 245.1$  Hz), 66.4, 44.0 (d,  $J = 7.9$  Hz), 30.8 (t,  $J = 23.7$  Hz), 18.7 ppm;  $^{19}\text{F}$  NMR (375 MHz,  $\text{CDCl}_3$ )  $\delta$  - 88.20 (dddd,  $J = 287.4, 30.0, 20.3, 6.0$  Hz, 1F), - 97.83 (dd,  $J = 287.4, 9.4$  Hz, 1F) ppm; HRMS (ESI)  $m/z$ :  $[\text{M} + \text{H}]^+$  Calcd for  $\text{C}_{27}\text{H}_{23}\text{F}_2\text{N}_2$  413.1829; Found 413.1830.

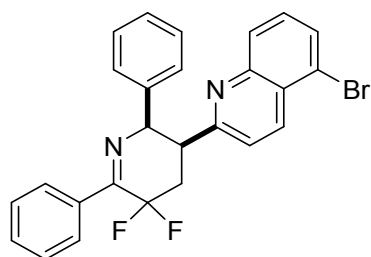

**5-Bromo-2-(5,5-difluoro-2,6-diphenyl-2,3,4,5-tetrahydropyridin-3-yl)quinoline**

(**30**, yellow solid), purified by flash column chromatography (eluent: Petroleum ether/EtOAc = 15/1), 45 mg (47% yield). Mp 146 – 150 °C. <sup>1</sup>H NMR (400 MHz, CDCl<sub>3</sub>) δ 8.10 (d, *J* = 7.2 Hz, 2H), 8.01 (dd, *J* = 7.6, 1.2 Hz, 1H), 7.96 (d, *J* = 8.4 Hz, 1H), 7.72 (dd, *J* = 8.0, 0.8 Hz, 1H), 7.51 – 7.44 (m, 3H), 7.35 (t, *J* = 7.6 Hz, 1H), 7.10 (t, *J* = 7.2 Hz, 1H), 7.01 (t, *J* = 7.2 Hz, 2H), 6.93 (d, *J* = 8.4 Hz, 1H), 6.60 (d, *J* = 7.2 Hz, 2H), 5.94 (t, *J* = 5.6 Hz, 1H), 4.25 – 4.20 (m, 1H), 2.99 – 2.82 (m, 1H), 2.74 – 2.65 (m, 1H) ppm; <sup>13</sup>C NMR (100 MHz, CDCl<sub>3</sub>) δ 160.6 (dd, *J* = 29.0, 25.1 Hz), 159.8, 144.5, 136.6, 134.6 (d, *J* = 2.0 Hz), 133.8, 133.2, 130.7, 128.5, 128.3, 128.0, 128.1, 127.8, 127.5, 127.3, 126.7, 125.1, 120.7, 115.8 (dd, *J* = 248.8, 244.7 Hz), 66.4, 44.0 (d, *J* = 8.0 Hz), 30.7 (t, *J* = 23.7 Hz) ppm; <sup>19</sup>F NMR (375 MHz, CDCl<sub>3</sub>) δ – 88.33 (dddd, *J* = 288.0, 30.0, 20.3, 5.6 Hz, 1F), – 97.67 (dd, *J* = 288.2, 9.4 Hz, 1F) ppm; HRMS (ESI) *m/z*: [M + H]<sup>+</sup> Calcd for C<sub>26</sub>H<sub>20</sub>BrF<sub>2</sub>N<sub>2</sub> 477.0778; Found 477.0775.

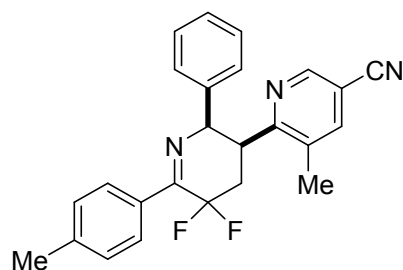

**5',5'-Difluoro-3-methyl-2'-phenyl-6'-(p-tolyl)-2',3',4',5'-tetrahydro-[2,3'-**

**bipyridine]-5-carbonitrile** (**3p**, yellow solid), purified by flash column chromatography (eluent: Petroleum ether/EtOAc = 14/1), 48 mg (60% yield). Mp 160 – 163 °C. <sup>1</sup>H NMR (400 MHz, CDCl<sub>3</sub>): δ 8.19 (d, *J* = 2.0 Hz, 1H), 7.89 (d, *J* = 8.0 Hz, 2H), 7.66 (d, *J* = 1.6 Hz, 1H), 7.18 (d, *J* = 8.0 Hz, 2H), 7.10 (t, *J* = 7.2 Hz 1H), 7.02 (t,

$J = 7.2$  Hz, 2H), 6.41 (d,  $J = 7.2$  Hz, 2H), 5.64 (t,  $J = 5.6$  Hz, 1H), 4.05 – 4.01 (m, 1H), 2.90 – 2.72 (m, 1H), 2.53 (s, 3H), 2.36 – 2.29 (m, 1H) ppm;  $^{13}\text{C}$  NMR (100 MHz,  $\text{CDCl}_3$ ):  $\delta$  161.1, 160.8 (dd,  $J = 29.1, 24.9$  Hz), 149.1, 141.3, 140.2, 134.4 (d,  $J = 2.5$  Hz), 132.1, 130.7, 129.2, 128.5, 128.0, 127.9, 127.8, 116.8, 116.4 (dd,  $J = 249.1, 244.4$  Hz), 107.8, 63.5, 40.5 (d,  $J = 8.6$  Hz), 30.6 (t,  $J = 23.6$  Hz), 21.5 (d,  $J = 2.1$  Hz), 18.3 (d,  $J = 2.1$  Hz) ppm;  $^{19}\text{F}$  NMR (375 MHz,  $\text{CDCl}_3$ ):  $\delta$  – 88.25 (d,  $J = 288.0$  Hz, 1F), – 98.55 (d,  $J = 288.0$  Hz, 1F) ppm; HRMS (ESI)  $m/z$ :  $[\text{M} + \text{H}]^+$  Calcd for  $\text{C}_{25}\text{H}_{22}\text{F}_2\text{N}_3$  402.1782; Found 402.1783.

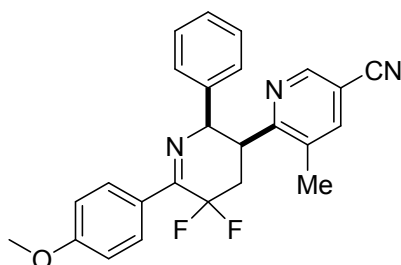

**5',5'-Difluoro-6'-(4-methoxyphenyl)-3-methyl-2'-phenyl-2',3',4',5'-tetrahydro-[2,3'-bipyridine]-5-carbonitrile (3q)**, white solid, purified by flash column chromatography (eluent: Petroleum ether/EtOAc = 11/1), 52 mg, (63% yield). Mp 154 – 155 °C.  $^1\text{H}$  NMR (400 MHz,  $\text{CDCl}_3$ ):  $\delta$  8.19 (d,  $J = 0.8$  Hz, 1H), 7.97 (d,  $J = 8.4$  Hz, 2H), 7.66 (s, 1H), 7.09 (t,  $J = 7.2$  Hz, 1H), 7.02, (t,  $J = 7.2$  Hz, 2H), 6.88 (d,  $J = 8.8$  Hz, 2H), 6.40 (d,  $J = 7.2$  Hz 2H), 5.62 (t,  $J = 5.6$  Hz, 1H), 4.03 – 4.00 (m, 1H), 3.78 (s, 3H), 2.90 – 2.72 (m, 1H), 2.53 (s, 3H), 2.35 – 2.27 (m, 1H) ppm;  $^{13}\text{C}$  NMR (100 MHz,  $\text{CDCl}_3$ ):  $\delta$  161.5 (d,  $J = 72.7$  Hz), 160.1 (dd,  $J = 28.7, 25.0$  Hz), 160.0, 149.1, 140.2, 134.5 (d,  $J = 2.5$  Hz), 132.1, 130.3, 129.0, 128.0 (d,  $J = 10.9$  Hz), 127.7, 125.9 (t,  $J = 2.5$  Hz), 116.8, 116.1 (dd,  $J = 249.2, 243.7$  Hz), 113.9 (d,  $J = 29.5$  Hz), 107.7, 63.4, 55.4 (dd,  $J = 10.3, 1.4$  Hz), 40.5 (d,  $J = 8.6$  Hz), 30.7 (t,  $J = 24.2$  Hz), 18.3 ppm;  $^{19}\text{F}$  NMR (375 MHz,  $\text{CDCl}_3$ )  $\delta$  – 88.20 (d,  $J = 287.3\text{Hz}$ , 1F), – 98.00 (d,  $J = 287.3$  Hz, 1F); HRMS (ESI)  $m/z$ :  $[\text{M} + \text{H}]^+$  Calcd for  $\text{C}_{25}\text{H}_{22}\text{F}_2\text{N}_3\text{O}$  418.1731; Found 418.1732.

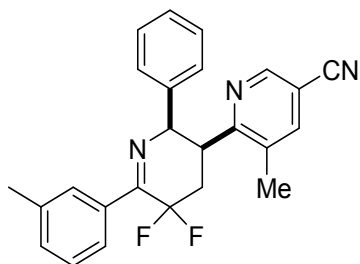

**5',5'-Difluoro-3-methyl-2'-phenyl-6'-(m-tolyl)-2',3',4',5'-tetrahydro-[2,3'-bipyridine]-5-carbonitrile (3r, yellow solid), purified by flash column chromatography (eluent: Petroleum ether/EtOAc = 14/1), 47 mg (59% yield). Mp 149 – 151 °C. <sup>1</sup>H NMR (400 MHz, CDCl<sub>3</sub>) δ 8.28 (d, *J* = 1.6 Hz, 1H), 7.87 (s, 2H), 7.75 (d, *J* = 1.2 Hz, 1H), 7.37 – 7.31 (m, 2H), 7.19 (t, *J* = 7.2 Hz, 1H), 7.11 (t, *J* = 7.2 Hz, 2H), 6.50 (d, *J* = 7.2 Hz, 2H), 5.73 (t, *J* = 5.6 Hz, 1H), 4.14 – 4.10 (m, 1H), 2.99 – 2.77 (m, 1H), 2.61 (s, 3H), 2.45 – 2.36 (m, 4H); <sup>13</sup>C NMR (100 MHz, CDCl<sub>3</sub>) δ 161.2 (dd, *J* = 29.4, 24.7 Hz), 161.1, 149.1, 140.2, 138.1, 134.3 (d, *J* = 2.6 Hz), 133.4 (t, *J* = 2.5 Hz), 132.1, 131.8, 128.9, 128.3, 128.1, 127.8, 127.9, 125.7 (t, *J* = 2.6 Hz), 116.7, 116.0 (dd, *J* = 249.1, 243.5 Hz), 107.8, 63.6, 40.5 (d, *J* = 8.6 Hz), 30.6 (t, *J* = 23.8 Hz), 21.5, 18.3 ppm; <sup>19</sup>F NMR (375 MHz, CDCl<sub>3</sub>) δ – 88.12 (dddd, *J* = 288.6, 32.0, 19.9, 5.6 Hz, 1F), – 98.88 (dd, *J* = 288.4, 9.0 Hz, 1F) ppm; HRMS (ESI) *m/z*: [M + H]<sup>+</sup> calcd for C<sub>25</sub>H<sub>22</sub>F<sub>2</sub>N<sub>3</sub> 402.1782, Found 402.1783.**

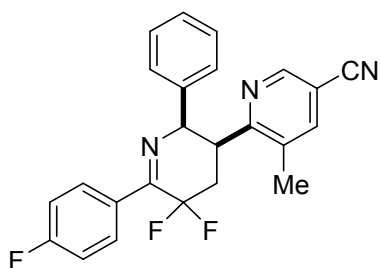

**5',5'-Difluoro-6'-(4-fluorophenyl)-3-methyl-2'-phenyl-2',3',4',5'-tetrahydro-[2,3'-bipyridine]-5-carbonitrile (3s, yellow oil), purified by flash column chromatography (eluent: Petroleum ether/EtOAc = 14/1), 50 mg (62% yield). <sup>1</sup>H NMR (400 MHz, CDCl<sub>3</sub>) δ 8.28 (d, *J* = 1.8 Hz, 1H), 8.08 (dd, *J* = 8.4, 6.0 Hz, 2H), 7.75 (d, *J* = 1.2 Hz, 1H), 7.19 (t, *J* = 7.2 Hz, 1H), 7.15 – 7.10 (m, 4H), 6.48 (d, *J* = 7.2 Hz, 2H), 5.71 (t, *J* =**

5.6 Hz, 1H), 4.12 – 4.09 (m, 1H), 2.97 – 2.85 (m, 1H), 2.61 (s, 3H), 2.44 – 2.38 (m, 1H); <sup>13</sup>C NMR (100 MHz, CDCl<sub>3</sub>) δ 164.5 (d, *J* = 250.1 Hz), 160.9, 159.8 (dd, *J* = 29.2, 25.3 Hz), 149.1, 140.2, 134.2 (d, *J* = 2.5 Hz), 132.1, 130.8 (d, *J* = 8.6 Hz), 129.6 (dd, *J* = 5.7, 2.9 Hz), 128.1, 127.9, 127.8, 116.7, 116.0 (dd, *J* = 249.3, 243.6 Hz), 115.5 (d, *J* = 21.5 Hz), 107.8, 63.6, 40.4 (d, *J* = 8.4 Hz), 30.6 (t, *J* = 22.9 Hz), 18.3 (d, *J* = 1.9 Hz); <sup>19</sup>F NMR (375 MHz, CDCl<sub>3</sub>) δ – 88.49 (d, *J* = 288.4 Hz, 1F), – 98.65 (d, *J* = 288.4 Hz, 1F), – 109.18 (s, 1F); HRMS (ESI) *m/z*: [M + H]<sup>+</sup> Calcd for C<sub>24</sub>H<sub>18</sub>F<sub>3</sub>N<sub>3</sub> 406.1531; Found 406.1532.

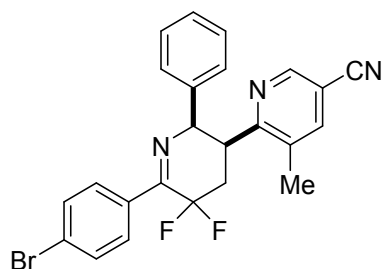

**6'-(4-Bromophenyl)-5',5'-difluoro-3-methyl-2'-phenyl-2',3',4',5'-tetrahydro-[2,3'-bipyridine]-5-carbonitrile (3t, yellow oil)**, purified by flash column chromatography (eluent: Petroleum ether/EtOAc = 14/1), 60 mg (64% yield). <sup>1</sup>H NMR (400 MHz, CDCl<sub>3</sub>) δ 8.20 (s, 1H), 8.01 (dd, *J* = 8.0, 6 Hz, 1H), 7.87 (d, *J* = 8.4 Hz, 1H), 7.68 (s, 1H), 7.51 (d, *J* = 8.8 Hz, 1H), 7.13 – 7.02 (m, 4H), 6.41 (d, *J* = 7.6 Hz, 2H), 5.64 (t, *J* = 5.6 Hz, 1H), 4.04 – 4.01 (m, 1H), 2.92 – 2.74 (m, 1H), 2.53 (s, 3H), 2.38 – 2.29 (m, 1H) ppm; <sup>13</sup>C NMR (100 MHz, CDCl<sub>3</sub>) δ 160.8, 160.1 (dd, *J* = 29.6, 25.1 Hz) 149.1, 140.2, 134.0 (d, *J* = 2.5 Hz), 132.3 (t, *J* = 2.6 Hz), 131.9, 131.6, 130.1, 129.6, 128.1, 127.9, 127.8, 125.8, 123.1, 116.7, 107.9, 63.7, 40.4 (d, *J* = 8.6 Hz), 30.6 (t, *J* = 23.1 Hz), 18.3 ppm; <sup>19</sup>F NMR (375 MHz, CDCl<sub>3</sub>) δ – 88.55 (d, *J* = 288.8 Hz, 1F), – 98.89 (d, *J* = 288.8 Hz, 1F) ppm; HRMS (ESI) *m/z*: [M + H]<sup>+</sup> Calcd for C<sub>24</sub>H<sub>19</sub>BrF<sub>2</sub>N<sub>3</sub> 466.0730; Found 466.0734.

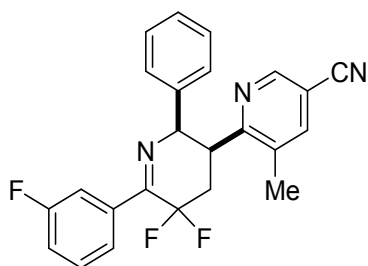

**5',5'-Difluoro-6'-(3-fluorophenyl)-3-methyl-2'-phenyl-2',3',4',5'-tetrahydro-[2,3'-bipyridine]-5-carbonitrile (3u, brown solid), purified by flash column chromatography (eluent: Petroleum ether/EtOAc = 15/1), 44 mg (55% yield). Mp 153 – 157 °C. <sup>1</sup>H NMR (400 MHz, CDCl<sub>3</sub>) δ 8.28 (d, *J* = 1.6 Hz, 1H), 7.86 (d, *J* = 8.0 Hz, 1H), 7.80 – 7.76 (m, 2H), 7.43 (td, *J* = 8.0 Hz, 6.0 Hz, 1H), 7.22 – 7.18 (m, 2H), 7.12 (t, *J* = 7.2 Hz, 2H), 6.49 (d, *J* = 7.2 Hz, 2H), 5.73 (t, *J* = 5.6 Hz, 1H), 4.13 – 4.08 (m, 1H), 3.00 – 2.82 (m, 1H), 2.61 (s, 3H), 2.47 – 2.38 (m, 1H) ppm; <sup>13</sup>C NMR (100 MHz, CDCl<sub>3</sub>) δ 162.7 (d, *J* = 246.6 Hz), 160.8, 160.0 (dd, *J* = 30.5, 26.4 Hz), 149.1, 140.2, 135.6 – 135.5 (m), 134.0 (d, *J* = 2.5 Hz), 132.0, 129.9 (d, *J* = 7.8 Hz), 128.1, 127.9, 127.8, 124.3, 117.9 (d, *J* = 21.2 Hz), 116.7, 115.8 (dd, *J* = 248.6, 243.9 Hz), 115.5 (d, *J* = 23.4 Hz), 107.9, 63.7, 40.4 (d, *J* = 8.6 Hz), 30.6 (t, *J* = 23.7 Hz), 18.3 ppm; <sup>19</sup>F NMR (375 MHz, CDCl<sub>3</sub>) δ – 88.62 (dddd, *J* = 289.5, 31.9, 20.3, 6.0 Hz, 1F), – 99.06 (dd, *J* = 289.3, 9.4 Hz, 1F), – 112.56 (ddd, 14.3, 8.6, 6.0 Hz, 1F) ppm; HRMS (ESI) *m/z*: [*M* + *H*]<sup>+</sup> Calcd for C<sub>24</sub>H<sub>19</sub>F<sub>3</sub>N<sub>3</sub> 406.1531; Found 406.1530.**

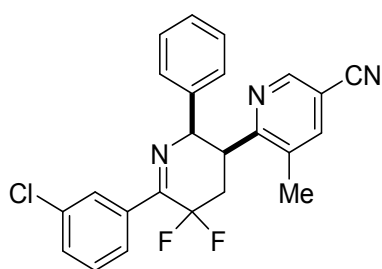

**6'-(3-Chlorophenyl)-5',5'-difluoro-3-methyl-2'-phenyl-2',3',4',5'-tetrahydro-[2,3'-bipyridine]-5-carbonitrile (3v, brown oil), purified by flash column chromatography (eluent: Petroleum ether/EtOAc = 15/1), 48 mg (54% yield). <sup>1</sup>H NMR (400 MHz, CDCl<sub>3</sub>): δ 8.28 (d, *J* = 1.8 Hz, 1H), 8.06 (s, 1H), 7.96 (d, *J* = 7.8 Hz, 1H), 7.76 (d, *J* =**

1.2 Hz, 1H), 7.49 (ddd,  $J = 8.0$ , 1.8, 0.6 Hz, 1H), 7.40 (t,  $J = 7.8$  Hz, 1H), 7.20 (t,  $J = 7.2$  Hz, 1H), 7.13 (t,  $J = 7.8$  Hz, 2H), 6.49 (d,  $J = 7.2$  Hz, 2H), 5.73 (t,  $J = 5.6$  Hz, 1H), 4.12 – 4.09 (m, 1H), 2.97 – 2.86 (m, 1H), 2.61 (s, 3H), 2.45 – 2.39 (m, 1H) ppm;  $^{13}\text{C}$  NMR (100 MHz,  $\text{CDCl}_3$ ):  $\delta$  160.8, 159.9 (dd,  $J = 39.9$ , 25.5 Hz), 149.1, 140.2, 135.1 (t,  $J = 2.8$  Hz), 134.6, 134.0 (d,  $J = 2.5$  Hz), 132.0, 131.0, 129.7, 128.5, 128.1, 127.9, 127.8, 126.7 (t,  $J = 2.8$  Hz), 116.7, 115.8 (dd,  $J = 249.2$  Hz, 243.4 Hz), 107.9, 63.7, 40.4 (d,  $J = 8.7$  Hz), 30.6 (t,  $J = 24.1$  Hz), 18.3 ppm;  $^{19}\text{F}$  NMR (375 MHz,  $\text{CDCl}_3$ )  $\delta$  – 88.57 (d,  $J = 289.1$  Hz, 1F), – 99.13 (d,  $J = 289.5$  Hz, 1F) ppm; HRMS (ESI)  $m/z$ :  $[\text{M} + \text{H}]^+$  Calcd for  $\text{C}_{24}\text{H}_{19}\text{ClF}_2\text{N}_3$  422.1236; Found 422.1235.

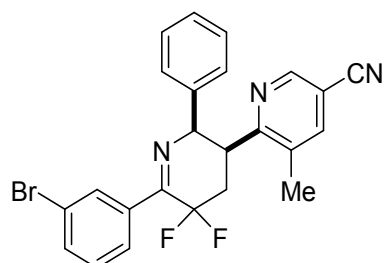

**6'-(3-Bromophenyl)-5',5'-difluoro-3-methyl-2'-phenyl-2',3',4',5'-tetrahydro-[2,3'-bipyridine]-5-carbonitrile (3w, yellow oil)**, purified by flash column chromatography (eluent: Petroleum ether/EtOAc = 15/1), 52 mg (56% yield).  $^1\text{H}$  NMR (400 MHz,  $\text{CDCl}_3$ )  $\delta$  8.20 (d,  $J = 1.2$  Hz, 1H), 8.14 (s, 1H), 7.93 (d,  $J = 8.0$  Hz, 1H), 7.68 (d,  $J = 0.8$  Hz, 1H), 7.56 (d,  $J = 8.0$  Hz, 1H), 7.26 (t,  $J = 8.0$  Hz, 1H), 7.12 (t,  $J = 7.2$  Hz, 1H), 7.06 (t,  $J = 7.2$  Hz, 2H), 6.41 (d,  $J = 7.6$  Hz, 2H), 5.65 (t,  $J = 5.6$  Hz, 1H), 4.04 – 4.00 (m, 1H), 2.92 – 2.75 (m, 1H), 2.53 (s, 3H), 2.39 – 2.30 (m, 1H) ppm;  $^{13}\text{C}$  NMR (100 MHz,  $\text{CDCl}_3$ )  $\delta$  160.8, 159.8 (dd,  $J = 29.4$ , 25.5 Hz), 149.1, 140.2, 135.4 (t,  $J = 2.6$  Hz), 134.0 (d,  $J = 2.5$  Hz), 133.9, 132.1, 131.5, 129.9, 128.1, 127.9, 127.8, 127.2 (t,  $J = 2.7$  Hz), 122.7, 116.7, 115.8 (dd,  $J = 248.8$ , 243.4 Hz) 107.9, 63.7, 40.4 (d,  $J = 8.5$  Hz), 30.6 (t,  $J = 23.2$  Hz), 18.3 ppm;  $^{19}\text{F}$  NMR (375 MHz,  $\text{CDCl}_3$ )  $\delta$  – 88.57 (d,  $J = 289.1$  Hz, 1F), – 99.15 (d,  $J = 289.5$  Hz, 1F) ppm; HRMS (ESI)  $m/z$ :  $[\text{M} + \text{H}]^+$  Calcd for  $\text{C}_{24}\text{H}_{19}\text{BrF}_2\text{N}_3$  466.0730; Found 466.0734.

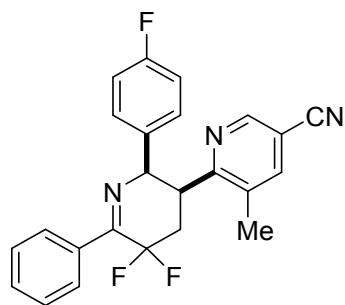

**5',5'-Difluoro-2'-(4-fluorophenyl)-3-methyl-6'-phenyl-2',3',4',5'-tetrahydro-[2,3'-bipyridine]-5-carbonitrile (3x**, yellow solid), purified by flash column chromatography (eluent: Petroleum ether/EtOAc = 13/1), 45 mg (60% yield). Mp 184 – 185 °C. <sup>1</sup>H NMR (400 MHz, CDCl<sub>3</sub>): δ 8.33 (d, *J* = 2.0 Hz, 1H), 8.06 (d, *J* = 7.2 Hz, 2H), 7.76 (d, *J* = 1.6 Hz, 1H), 7.52 (t, *J* = 7.2 Hz, 1H), 7.47 (t, *J* = 7.6 Hz, 2H), 6.82 (t, *J* = 8.8 Hz, 2H), 6.47 (dd, *J* = 8.4, 5.2 Hz, 2H), 5.71 (t, *J* = 5.6 Hz, 1H), 4.13 – 4.08 (m, 1H), 2.95 – 2.77 (m, 1H), 2.61 (s, 3H), 2.46 – 2.38 (m, 1H) ppm; <sup>13</sup>C NMR (100 MHz, CDCl<sub>3</sub>): δ 162.2 (d, *J* = 245.8 Hz), 161.2 (dd, *J* = 29.2, 25.0 Hz), 160.8, 149.2, 140.3, 133.3 (t, *J* = 2.3 Hz), 132.0, 131.1, 130.2 (d, *J* = 3.7 Hz), 129.4 (d, *J* = 8.2 Hz), 128.5, 128.4, 116.6, 115.8 (dd, *J* = 249.3, 245.3 Hz), 115.1 (d, *J* = 21.5 Hz), 108.0, 62.9, 40.3 (d, *J* = 8.7 Hz), 30.6 (t, *J* = 23.6 Hz), 18.3 ppm; <sup>19</sup>F NMR (375 MHz, CDCl<sub>3</sub>) δ – 88.44 (d, *J* = 289.1 Hz, 1F), – 98.77 (d, *J* = 289.1 Hz, 1F), – 114.06 (s, 1F) ppm; HRMS (ESI) *m/z*: [M + H]<sup>+</sup> Calcd for C<sub>24</sub>H<sub>19</sub>F<sub>3</sub>N<sub>3</sub> 406.1531; Found 406.1532.

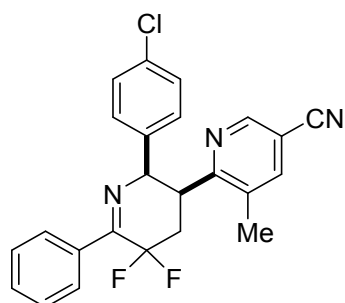

**2'-(4-Chlorophenyl)-5',5'-difluoro-3-methyl-6'-phenyl-2',3',4',5'-tetrahydro-[2,3'-bipyridine]-5-carbonitrile (3y**, yellow oil), purified by flash column chromatography (eluent: Petroleum ether/EtOAc = 13/1), 51 mg (61% yield). <sup>1</sup>H NMR (400 MHz, CDCl<sub>3</sub>) δ 8.34 (d, *J* = 1.6 Hz, 1H), 8.05 (d, *J* = 7.6 Hz, 2H), 7.76 (d, *J* = 1.2 Hz, 1H),



7.52 (t,  $J = 7.2$  Hz, 1H), 7.46 (t,  $J = 7.2$  Hz, 2H), 7.10 (d,  $J = 7.6$  Hz, 2H), 6.43 (d,  $J = 8.4$  Hz, 2H), 5.69 (t,  $J = 5.6$  Hz, 1H), 4.13 – 4.09 (m, 1H), 2.93 – 2.75 (m, 1H), 2.60 (s, 3H), 2.47 – 2.38 (m, 1H) ppm;  $^{13}\text{C}$  NMR (100 MHz,  $\text{CDCl}_3$ )  $\delta$  161.4 (dd,  $J = 29.1, 24.7$  Hz), 160.7, 149.2, 140.4, 133.8, 133.3 (t,  $J = 2.5$  Hz), 133.0 (d,  $J = 2.7$  Hz), 132.06, 131.1, 129.2, 128.5, 128.5, 128.3, 116.6, 115.8 (dd,  $J = 249.1, 243.5$  Hz), 108.0, 63.0, 40.3 (d,  $J = 8.5$  Hz), 30.7 (t,  $J = 23.7$  Hz), 18.3 ppm;  $^{19}\text{F}$  NMR (375 MHz,  $\text{CDCl}_3$ )  $\delta$  – 88.39, (dddd,  $J = 289.5, 31.5, 19.9, 5.6$  Hz, 1F), – 98.67 (dd,  $J = 289.5, 9.4$  Hz, 1F) ppm; HRMS (ESI)  $m/z$ :  $[\text{M} + \text{H}]^+$  Calcd for  $\text{C}_{24}\text{H}_{19}\text{ClF}_2\text{N}_3$  422.1236; Found 422.1235.

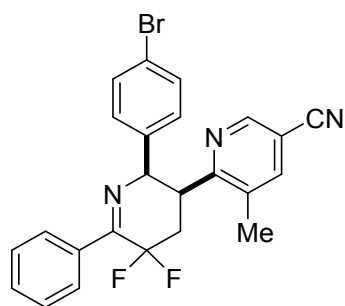

**2'-(4-Bromophenyl)-5',5'-difluoro-3-methyl-6'-phenyl-2',3',4',5'-tetrahydro-[2,3'-bipyridine]-5-carbonitrile (3z, yellow oil)**, purified by flash column chromatography (eluent: Petroleum ether/EtOAc = 13/1), 59 mg (64% yield).  $^1\text{H}$  NMR (400 MHz,  $\text{CDCl}_3$ )  $\delta$  8.26 (d,  $J = 1.6$  Hz, 1H), 7.97 (d,  $J = 7.6$  Hz, 2H), 7.68 (d,  $J = 1.2$  Hz, 1H), 7.44 (t,  $J = 7.2$  Hz, 1H), 7.38 (t,  $J = 7.2$  Hz, 2H), 7.17 (d,  $J = 8.0$  Hz, 2H), 6.29 (d,  $J = 8.4$  Hz, 2H), 5.59 (t,  $J = 5.6$  Hz, 1H), 4.06 – 3.99 (m, 1H), 2.84 – 2.67 (m, 1H), 2.51 (s, 3H), 2.39 – 2.30 (m, 1H) ppm;  $^{13}\text{C}$  NMR (100 MHz,  $\text{CDCl}_3$ )  $\delta$  161.4 (dd,  $J = 29.4, 25.0$  Hz), 160.7, 149.3, 140.4, 133.6 (d,  $J = 2.6$  Hz), 133.3 (d,  $J = 2.6$  Hz), 132.1, 131.2, 131.1, 129.5, 128.5, 122.0, 116.6, 115.8 (dd,  $J = 249.3, 243.8$  Hz) 108.1, 63.0, 40.2 (d,  $J = 8.5$  Hz), 30.7 (t,  $J = 23.8$  Hz), 18.3 ppm;  $^{19}\text{F}$  NMR (375 MHz,  $\text{CDCl}_3$ )  $\delta$  – 88.36 (d,  $J = 289.5$  Hz, 1F), – 98.62 (d,  $J = 289.1$  Hz, 1F) ppm; HRMS (ESI)  $m/z$ :  $[\text{M} + \text{H}]^+$  Calcd for  $\text{C}_{24}\text{H}_{19}\text{ClF}_2\text{N}_3$  466.0730; Found 466.0729.

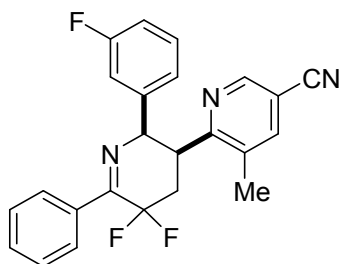

**5',5'-Difluoro-2'-(3-fluorophenyl)-3-methyl-6'-phenyl-2',3',4',5'-tetrahydro-[2,3'-bipyridine]-5-carbonitrile (3aa, brown oil)**, purified by flash column chromatography (eluent: Petroleum ether/EtOAc = 13/1), 49 mg (61% yield). Mp 154 – 159 °C  $^1\text{H}$  NMR (400 MHz,  $\text{CDCl}_3$ )  $\delta$  8.25 (d,  $J = 1.6$  Hz, 1H), 7.99 (d,  $J = 7.2$  Hz, 2H), 7.69 (d,  $J = 1.2$  Hz, 1H), 7.45 – 7.37 (m, 3H), 7.00 (td,  $J = 8.4$  Hz, 6.8 Hz, 1H), 6.84– 6.79 (m, 1H), 6.19 (d,  $J = 8.8$  Hz, 2H), 5.63 (t,  $J = 5.6$  Hz, 1H), 4.07 – 4.03 (m, 1H), 2.90 – 2.73 (m, 1H), 2.53 (s, 3H), 2.41– 2.32 (m, 1H) ppm;  $^{13}\text{C}$  NMR (100 MHz,  $\text{CDCl}_3$ )  $\delta$  162.5 ( $J = 245.4$  Hz), 161.5 (dd,  $J = 29.5, 24.8$  Hz), 160.7, 149.2, 140.4, 137.2 (dd,  $J = 6.6, 2.5$  Hz) 133.3 (d,  $J = 2.7$  Hz), 132.0, 131.1, 129.5 (d,  $J = 8.2$  Hz), 128.5, 128.4, 123.6 (d,  $J = 2.9$  Hz), 116.6, 115.7 (dd,  $J = 250.0, 243.8$  Hz), 115.0 (d,  $J = 22.2$  Hz), 114.8 (d,  $J = 20.9$  Hz), 108.0, 63.1, 40.3 (d,  $J = 8.4$  Hz), 30.8 (t,  $J = 24.4$  Hz), 18.3 ppm;  $^{19}\text{F}$  NMR (375 MHz,  $\text{CDCl}_3$ )  $\delta$  – 88.44 (dddd,  $J = 289.5, 31.5, 19.9, 6.0$  Hz, 1F), – 98.66 (dd,  $J = 289.5, 9.4$  Hz, 1F), – 112.71 (td,  $J = 9.0, 5.6$  Hz, 1F) ppm; HRMS (ESI)  $m/z$ :  $[\text{M} + \text{H}]^+$  Calcd for  $\text{C}_{24}\text{H}_{19}\text{F}_3\text{N}_3$  406.1531; Found 406.1530.

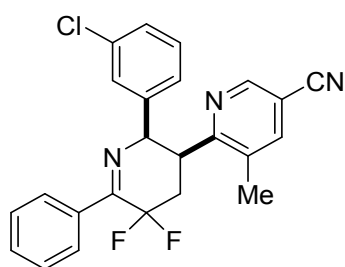

**2'-(3-Chlorophenyl)-5',5'-difluoro-3-methyl-6'-phenyl-2',3',4',5'-tetrahydro-[2,3'-bipyridine]-5-carbonitrile (3ab, yellow solid)**, purified by flash column chromatography (eluent: Petroleum ether/EtOAc = 14/1), 48 mg (59% yield). Mp 159 – 162 °C.  $^1\text{H}$  NMR (400 MHz,  $\text{CDCl}_3$ ):  $\delta$  8.19 (d,  $J = 1.6$  Hz, 1H), 7.95 (d,  $J = 7.2$  Hz,

2H), 7.54 (d,  $J = 1.6$  Hz, 1H), 7.44 (t,  $J = 7.2$  Hz, 1H), 7.38 (t,  $J = 7.2$  Hz, 2H), 7.18–7.05 (m, 3H), 6.85 (dd,  $J = 7.6, 1.6$  Hz, 1H), 6.10 (t,  $J = 5.6$  Hz, 1H), 4.14–4.08 (m, 1H), 3.01 – 2.84 (m, 1H), 2.41 (s, 3H), 2.38 – 2.28 (m, 1H) ppm;  $^{13}\text{C}$  NMR (100 MHz,  $\text{CDCl}_3$ ):  $\delta$  161.7 (dd,  $J = 29.4, 24.8$  Hz), 160.5, 148.6, 139.7, 133.9, 133.5, 132.8 (d,  $J = 2.2$  Hz), 130.9, 130.1, 129.5, 129.1, 128.5 (t,  $J = 2.6$  Hz), 128.4, 126.6, 116.9, 115.4 (dd,  $J = 249.9, 243.0$  Hz), 107.8, 59.6, 39.0 (d,  $J = 7.4$  Hz), 32.1 (t,  $J = 23.7$  Hz), 18.6 (d,  $J = 1.1$  Hz) ppm;  $^{19}\text{F}$  NMR (375 MHz,  $\text{CDCl}_3$ )  $\delta$  – 88.32 (d,  $J = 288.4$  Hz, 1F), – 97.61 (d,  $J = 288.4$  Hz, 1F) ppm; HRMS (ESI)  $m/z$ :  $[\text{M} + \text{H}]^+$  Calcd for  $\text{C}_{24}\text{H}_{19}\text{ClF}_2\text{N}_3$  422.1236; Found 422.1235.

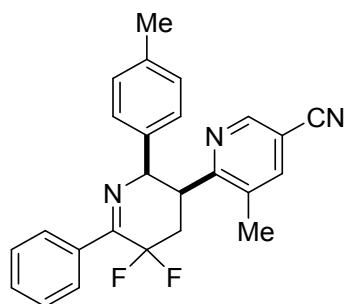

**5',5'-Difluoro-3-methyl-6'-phenyl-2'-(p-tolyl)-2',3',4',5'-tetrahydro-[2,3'-bipyridine]-5-carbonitrile (3ac, yellow solid), purified by flash column chromatography (eluent: Petroleum ether/EtOAc = 13/1), 50 mg (67% yield). Mp 135 – 136 °C.  $^1\text{H}$  NMR (400 MHz,  $\text{CDCl}_3$ ):  $\delta$  8.23 (d,  $J = 1.6$  Hz, 1H), 7.99 (d,  $J = 7.6$  Hz, 2H), 7.66 (d,  $J = 1.2$  Hz, 1H), 7.43 (t,  $J = 7.2$  Hz, 1H), 7.37 (t,  $J = 7.2$  Hz, 2H), 6.84 (d,  $J = 8.0$  Hz, 2H), 6.29 (d,  $J = 8.0$  Hz, 2H), 5.63 (t,  $J = 5.6$  Hz, 1H), 4.04 – 3.99 (m, 1H), 2.90 – 2.72 (m, 1H), 2.53 (s, 3H), 2.37 – 2.28 (m, 1H), 2.18 (s, 3H) ppm;  $^{13}\text{C}$  NMR (100 MHz,  $\text{CDCl}_3$ ):  $\delta$  161.2, 160.8 (dd,  $J = 29.5, 24.8$  Hz), 149.1, 140.2, 137.6, 133.5 (t,  $J = 2.5$  Hz), 132.1, 131.1 (d,  $J = 2.7$  Hz), 130.9, 128.8, 128.5, 128.4, 127.8, 116.8, 116.1 (dd,  $J = 249.1, 243.6$  Hz), 107.8, 63.4, 40.5 (d,  $J = 8.5$  Hz), 29.7 (t,  $J = 23.7$  Hz), 21.1, 18.3 ppm;  $^{19}\text{F}$  NMR (375 MHz,  $\text{CDCl}_3$ )  $\delta$  – 88.26 (d,  $J = 288.7$  Hz, 1F), – 99.03 (d,  $J = 288.4$  Hz, 1F) ppm; HRMS (ESI)  $m/z$ :  $[\text{M} + \text{H}]^+$  Calcd for  $\text{C}_{25}\text{H}_{22}\text{F}_2\text{N}_3$  402.1782; Found 402.1783.**

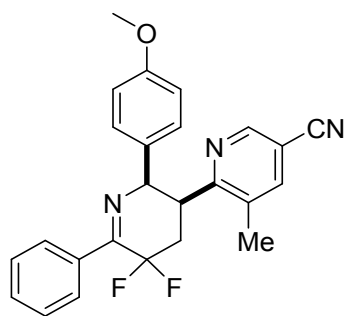

**5',5'-Difluoro-2'-(4-methoxyphenyl)-3-methyl-6'-phenyl-2',3',4',5'-tetrahydro-[2,3'-bipyridine]-5-carbonitrile (3ad**, white solid), purified by flash column chromatography (eluent: Petroleum ether/EtOAc = 10/1), 55 mg (66% yield). Mp 141 – 143 °C. <sup>1</sup>H NMR (400 MHz, CDCl<sub>3</sub>) δ 8.26 (d, *J* = 1.4 Hz, 1H), 7.99 (d, *J* = 7.6 Hz, 2H), 7.68 (d, *J* = 1.2 Hz, 1H), 7.44 (t, *J* = 7.2 Hz, 1H), 7.38 (t, *J* = 7.2 Hz, 2H), 6.57 (d, *J* = 8.4 Hz, 2H), 6.33 (d, *J* = 8.8 Hz, 2H), 5.62 (t, *J* = 5.6 Hz, 1H), 4.04 – 3.99 (m, 1H), 3.66 (s, 3H), 2.90 – 2.72 (m, 1H), 2.54 (s, 3H), 2.37 – 2.29 (m, 1H) ppm; <sup>13</sup>C NMR (100 MHz, CDCl<sub>3</sub>) δ 161.2, 160.7 (dd, *J* = 29.4, 24.9 Hz) 159.1, 149.2, 140.2, 133.5 (t, *J* = 2.6 Hz), 132.0, 130.9, 128.9, 128.5, 128.4, 126.1 (d, *J* = 2.7 Hz), 116.8, 116.0 (dd, *J* = 248.9, 243.6 Hz), 113.5, 107.8, 63.0, 55.2, 40.5 (d, *J* = 8.7 Hz), 30.5 (t, *J* = 23.7 Hz), 18.3 ppm; <sup>19</sup>F NMR (375 MHz, CDCl<sub>3</sub>) δ – 88.38 (d, *J* = 288.4 Hz, 1F), – 98.88 (d, *J* = 288.4 Hz, 1F) ppm; HRMS (ESI) *m/z*: [M + H]<sup>+</sup> Calcd for C<sub>25</sub>H<sub>22</sub>F<sub>2</sub>N<sub>3</sub>O 418.1731; Found 418.1732.

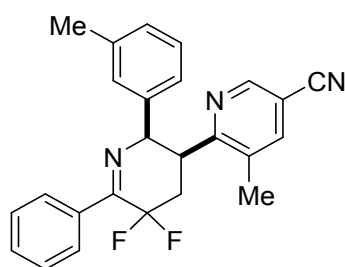

**5',5'-Difluoro-3-methyl-6'-phenyl-2'-(m-tolyl)-2',3',4',5'-tetrahydro-[2,3'-bipyridine]-5-carbonitrile (3ae**, yellow solid), purified by flash column chromatography (eluent: Petroleum ether/EtOAc = 14/1), 51 mg (64% yield). Mp 145 – 147 °C. <sup>1</sup>H NMR (400 MHz, CDCl<sub>3</sub>): δ 8.30 (d, *J* = 1.6 Hz, 1H), 8.08 (d, *J* = 7.2 Hz, 2H), 7.75 (d, *J* = 1.2 Hz, 1H), 7.51 (t, *J* = 7.2 Hz, 1H), 7.446 (t, *J* = 7.2 Hz, 2H), 6.98 (d, *J* = 4.8 Hz, 2H), 6.28 – 6.25 (m, 2H), 5.69 (t, *J* = 5.6 Hz, 1H), 4.13 – 4.08 (m, 1H),

3.00 – 2.81 (m, 1H), 2.61 (s, 3H), 2.45 – 2.36 (m, 1H), 2.15 (s, 3H) ppm;  $^{13}\text{C}$  NMR (100 MHz,  $\text{CDCl}_3$ ):  $\delta$  161.2, 160.9 (dd,  $J = 29.5, 24.9$  Hz), 149.0, 140.1, 137.6, 134.1 (d,  $J = 2.7$  Hz), 133.5 (t,  $J = 2.5$  Hz), 132.1, 130.9, 128.6, 128.6, 128.5, 128.4, 127.9, 125.0, 116.8, 116.0 (dd,  $J = 249.3, 243.5$  Hz), 107.7, 63.5, 40.5 (d,  $J = 8.6$  Hz), 30.6 (t,  $J = 23.7$  Hz), 21.4, 18.3 ppm;  $^{19}\text{F}$  NMR (375 MHz,  $\text{CDCl}_3$ )  $\delta$  – 88.29 (d,  $J = 288.4$  Hz, 1F), – 99.00 (d,  $J = 288.4$  Hz, 1F) ppm; HRMS (ESI)  $m/z$ :  $[\text{M} + \text{H}]^+$  Calcd for  $\text{C}_{25}\text{H}_{22}\text{F}_2\text{N}_3$  402.1782; Found 402.1783.

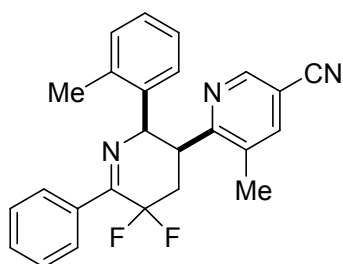

**5',5'-Difluoro-3-methyl-6'-phenyl-2'-(o-tolyl)-2',3',4',5',5'-tetrahydro-[2,3'-bipyridine]-5-carbonitrile (3af, yellow solid), purified by flash column chromatography (eluent: Petroleum ether/EtOAc = 14/1), 42 mg (52% yield). Mp 148 – 151 °C  $^1\text{H}$  NMR (400 MHz,  $\text{CDCl}_3$ ):  $\delta$  8.22 (d,  $J = 1.6$  Hz, 1H), 7.94 (d,  $J = 7.6$  Hz, 2H), 7.56 (d,  $J = 1.2$  Hz, 1H), 7.42 (t,  $J = 7.2$  Hz, 1H), 7.37 (t,  $J = 7.2$  Hz, 2H), 7.08 – 7.06 (m, 2H), 6.89 – 6.86 (m, 1H), 6.76 – 6.73 (m, 1H), 5.85 (t,  $J = 5.6$  Hz, 1H), 4.08 – 4.03 (m, 1H), 3.11 – 2.94 (m, 1H), 2.38 – 2.27 (m, 4H), 1.65 (s, 3H) ppm;  $^{13}\text{C}$  NMR (100 MHz,  $\text{CDCl}_3$ ):  $\delta$  161.1, 161.1 (dd,  $J = 29.5, 24.7$  Hz), 148.9, 139.8, 135.7, 133.8 (t,  $J = 2.4$  Hz), 132.9 (d,  $J = 1.9$  Hz), 132.6, 130.8, 130.7, 128.5, 128.4, 128.4, 127.7, 125.8, 116.7, 115.6 (dd,  $J = 250.2, 242.2$  Hz), 107.8, 59.5, 39.6 (d,  $J = 8.1$  Hz), 32.1 (t,  $J = 23.7$  Hz), 18.8, 18.5 ppm;  $^{19}\text{F}$  NMR (375 MHz,  $\text{CDCl}_3$ )  $\delta$  – 87.65 (d,  $J = 287.6$  Hz, 1F), – 98.14 (d,  $J = 287.6$  Hz, 1F) ppm; HRMS (ESI)  $m/z$ :  $[\text{M} + \text{H}]^+$  Calcd for  $\text{C}_{25}\text{H}_{22}\text{F}_2\text{N}_3$  402.1782; Found 402.1783.**

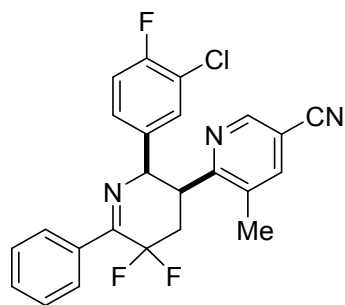

**2'-(3-Chloro-4-fluorophenyl)-5',5'-difluoro-3-methyl-6'-phenyl-2',3',4',5'-tetrahydro-[2,3'-bipyridine]-5-carbonitrile (3ag, yellow solid), purified by flash column chromatography (eluent: Petroleum ether/EtOAc = 14/1), 55 mg, (63% yield). Mp 138 – 142 °C <sup>1</sup>H NMR (400 MHz, CDCl<sub>3</sub>) δ 8.37 (d, *J* = 1.6 Hz, 1H), 8.06 (d, *J* = 7.6 Hz, 2H), 7.79 (d, *J* = 1.2 Hz, 1H), 7.54 (t, *J* = 7.2 Hz, 1H), 7.48 (t, *J* = 7.2 Hz, 2H), 6.90 (t, *J* = 8.6 Hz, 1H), 6.49 (dd, *J* = 6.8, 2.4 Hz, 1H), 6.38 (ddd, *J* = 8.4, 4.4, 2.4 Hz, 1H), 5.64 (t, *J* = 5.6 Hz, 1H), 4.13 – 4.08 (m, 1H), 2.90 – 2.73 (m, 1H), 2.60 (s, 3H), 2.48 – 2.40 (m, 1H) ppm; <sup>13</sup>C NMR (100 MHz, CDCl<sub>3</sub>) δ 161.7 (dd, *J* = 29.3, 25.0 Hz), 160.5, 157.5 (d, *J* = 248.2 Hz), 149.2, 140.5, 133.1, 132.1, 131.8 (t, *J* = 3.1 Hz), 131.2, 130.1, 128.5, 127.5 (d, *J* = 7.2 Hz), 120.8 (d, *J* = 17.7 Hz), 116.4, 116.1 (d, *J* = 20.9 Hz), 115.6 (dd, *J* = 249.5, 244.0 Hz), 108.2, 62.5, 40.1 (d, *J* = 8.3 Hz), 30.7 (t, *J* = 23.9 Hz), 18.3 ppm; <sup>19</sup>F NMR (375 MHz, CDCl<sub>3</sub>) δ – 88.62 (dddd, *J* = 289.5, 30.8, 19.5, 6.0 Hz, 1F), – 98.44 (dd, *J* = 289.9, 9.4 Hz, 1F), – 116.10 – – 116.16 (m, 1F) ppm; HRMS (ESI) *m/z*: [M + H]<sup>+</sup> Calcd for C<sub>24</sub>H<sub>18</sub>ClF<sub>3</sub>N<sub>3</sub> 440.1141; Found 440.1140.**

## 5. Mechanism Study

### 5.1 Calculation methods

Spin-unrestricted density functional theory (DFT) calculations were performed using the Gaussian 16 program package.<sup>[4]</sup> All structures and molecular frontier orbitals were optimized without symmetry constrains at the B3LYP/6-311G (d, P) level.<sup>[5-8]</sup> The nature of all intermediates was confirmed by performing normal-mode analysis, and transition states (TSs) were confirmed by vibrational analysis and characterized by occurrence of only one imaginary

frequency. Intrinsic reaction coordinate (IRC) calculations along the whole pathway were performed in order to further verify the TSs. To calculate the solvent effect (dichloroethane), the self-consistent reaction field method based on the SMD<sup>[9]</sup> model was utilized.

## 5.2 DFT calculations

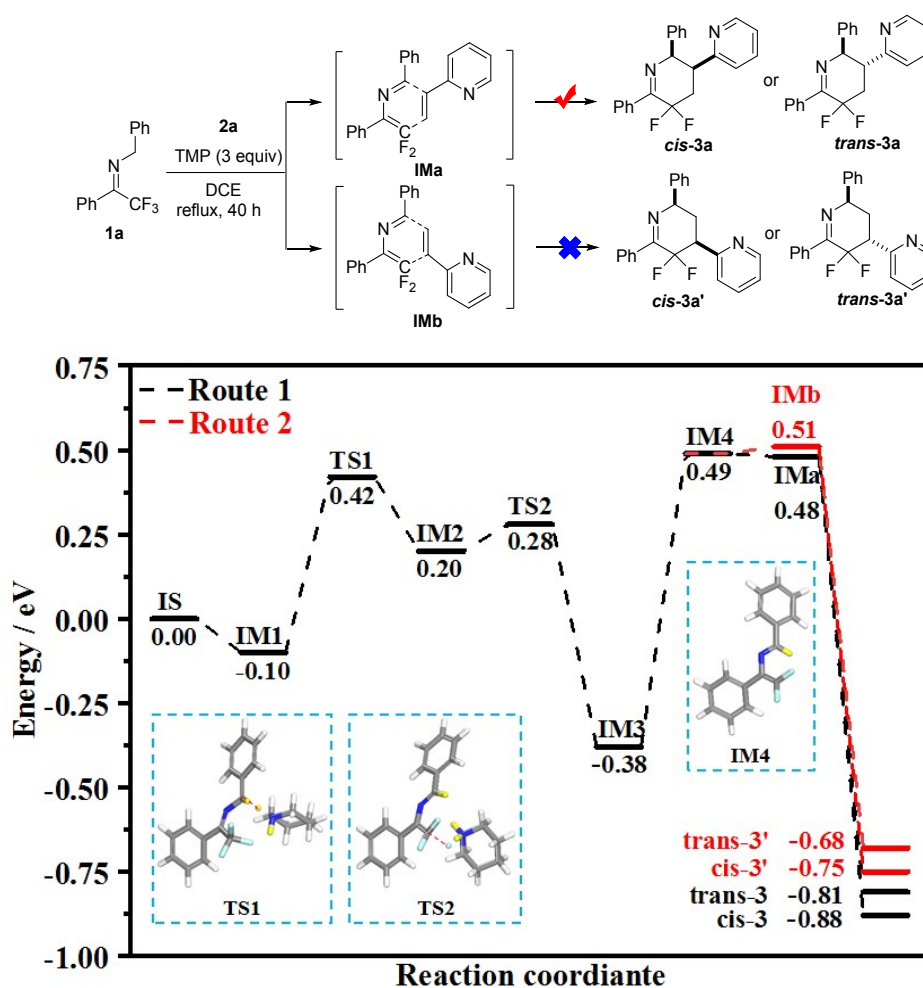

**Figure S4.** DFT calculations: calculated energy profiles within the process of the formation of product 3.

Density functional theory (DFT) calculations were performed to estimate the energy profiles for the formation of product 3 together with the structures of the key transition states. We could find that (*E*)-*N*-(2,2-difluoro-1-phenylvinyl)-1-phenylmethanimine **IM4** is the key state for the formation of product 3, and this finding is consistent with the experiment. Through calculation, we could find that **IM4** can be

obtained by removing HF through benzyl trifluoromethyl ketamine **IS1** under the action of TMP **IS3**. In addition, the activation of C-H bond is the rate-determining step of the formation of **IM4**, and the related reaction energy barrier is 0.52 eV. Next, the activation of C-F bond is relatively easy, and the reaction energy barrier of C-F bond is 0.08 eV. When **IM4** is formed, there are two routes for the addition reaction of **IM4** and 2-vinyl pyridine **IS2**, one route is the *ortho* disubstituted addition reaction (such as the black dotted path); the other route is the *meta* disubstituted addition reaction (such as the red dotted path). We could find that the co-adsorption energy of **IM4** and **IS2** in the addition reaction path to give the *ortho* disubstituted products is lower (ie, the energy of **IMa** less than **IMb** about 0.03 eV); and the *cis ortho* disubstituted product formed has the lowest energy (namely, the product of *cis-3a* is more stable than the other three products). This is consistent with the experimental results.

### 5.3 structures of the key states

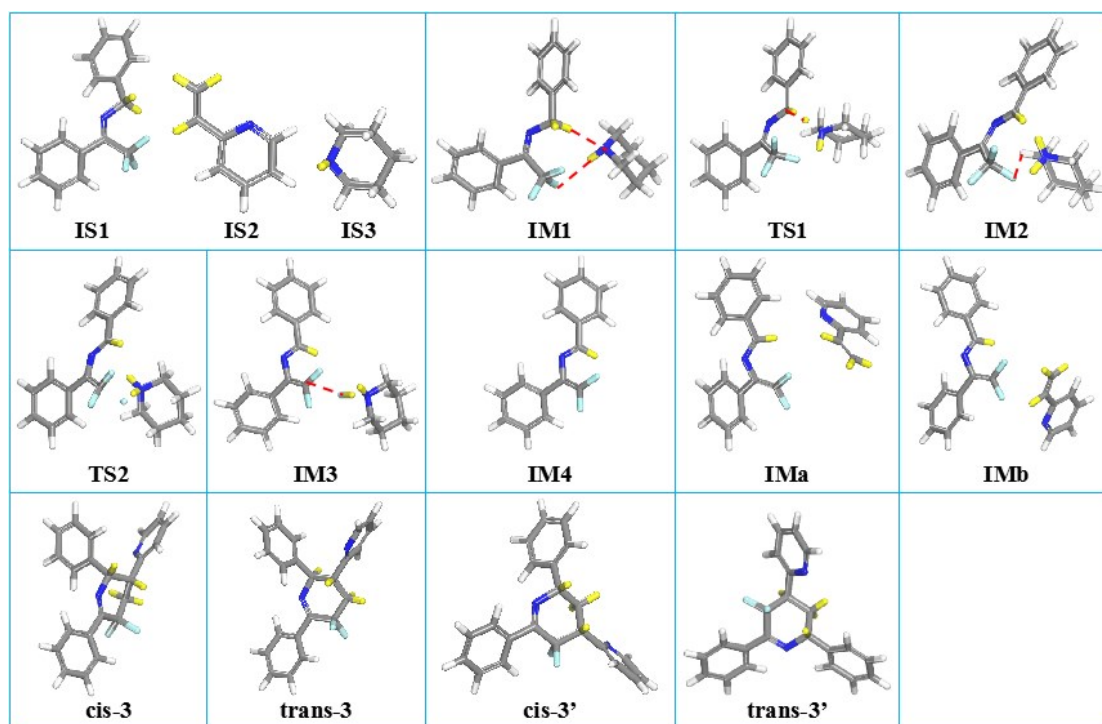

**Figure S5.** Calculated structures of the key states within the process of product **3** formation.



## 6. Determination of X-ray crystallographic structure 3q

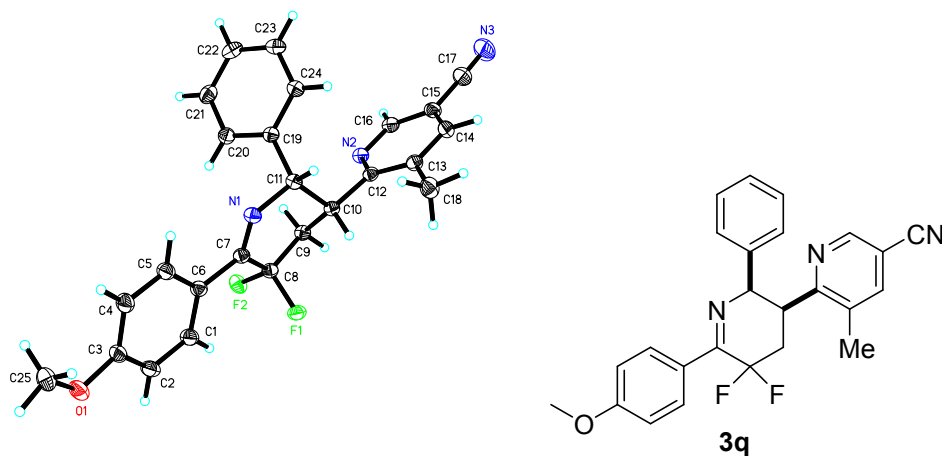

**Figure S6.** X-Ray crystal structure of compound **3q**

Table 1. Crystal data and structure refinement for mo\_d8v19040\_0m.

|                                 |                                                                 |                              |
|---------------------------------|-----------------------------------------------------------------|------------------------------|
| Identification code             | mo_d8v19040_0m                                                  |                              |
| Empirical formula               | C <sub>25</sub> H <sub>21</sub> F <sub>2</sub> N <sub>3</sub> O |                              |
| Formula weight                  | 417.45                                                          |                              |
| Temperature                     | 193(2) K                                                        |                              |
| Wavelength                      | 0.71073 Å                                                       |                              |
| Crystal system                  | Triclinic                                                       |                              |
| Space group                     | P -1                                                            |                              |
| Unit cell dimensions            | a = 8.5086(6) Å                                                 | $\alpha = 72.392(2)^\circ$ . |
|                                 | b = 10.5713(7) Å                                                | $\beta = 82.024(2)^\circ$ .  |
|                                 | c = 12.6956(10) Å                                               | $\gamma = 76.981(2)^\circ$ . |
| Volume                          | 1057.38(13) Å <sup>3</sup>                                      |                              |
| Z                               | 2                                                               |                              |
| Density (calculated)            | 1.311 Mg/m <sup>3</sup>                                         |                              |
| Absorption coefficient          | 0.094 mm <sup>-1</sup>                                          |                              |
| F(000)                          | 436                                                             |                              |
| Crystal size                    | 0.180 x 0.150 x 0.130 mm <sup>3</sup>                           |                              |
| Theta range for data collection | 2.879 to 25.999°.                                               |                              |
| Index ranges                    | -10 ≤ h ≤ 10, -13 ≤ k ≤ 12, -15 ≤ l ≤ 15                        |                              |
| Reflections collected           | 15468                                                           |                              |
| Independent reflections         | 4115 [R(int) = 0.0309]                                          |                              |
| Completeness to theta = 25.242° | 98.9 %                                                          |                              |

|                                   |                                             |
|-----------------------------------|---------------------------------------------|
| Absorption correction             | Semi-empirical from equivalents             |
| Max. and min. transmission        | 0.7456 and 0.6526                           |
| Refinement method                 | Full-matrix least-squares on F <sup>2</sup> |
| Data / restraints / parameters    | 4115 / 0 / 283                              |
| Goodness-of-fit on F <sup>2</sup> | 1.037                                       |
| Final R indices [I>2sigma(I)]     | R1 = 0.0375, wR2 = 0.0895                   |
| R indices (all data)              | R1 = 0.0443, wR2 = 0.0946                   |
| Largest diff. peak and hole       | 0.232 and -0.164 e.Å <sup>-3</sup>          |

Table 2. Atomic coordinates ( $\times 10^4$ ) and equivalent isotropic displacement parameters ( $\text{\AA}^2 \times 10^3$ ) for mo\_d8v19040\_0m. U(eq) is defined as one third of the trace of the orthogonalized  $U^{ij}$  tensor.

|       | x       | y        | z        | U(eq) |
|-------|---------|----------|----------|-------|
| F(1)  | 77(1)   | 6653(1)  | 7275(1)  | 41(1) |
| F(2)  | 1411(1) | 7924(1)  | 7733(1)  | 41(1) |
| O(1)  | 3964(1) | 2534(1)  | 11532(1) | 48(1) |
| N(1)  | 3864(1) | 5669(1)  | 6428(1)  | 31(1) |
| N(2)  | 1910(1) | 9292(1)  | 3583(1)  | 31(1) |
| N(3)  | 1645(2) | 10983(2) | -333(1)  | 80(1) |
| C(1)  | 2113(2) | 5245(1)  | 9290(1)  | 39(1) |
| C(2)  | 2413(2) | 4370(2)  | 10330(1) | 42(1) |
| C(3)  | 3806(2) | 3383(1)  | 10483(1) | 37(1) |
| C(4)  | 4936(2) | 3315(1)  | 9593(1)  | 40(1) |
| C(5)  | 4633(2) | 4199(1)  | 8561(1)  | 37(1) |
| C(6)  | 3213(2) | 5161(1)  | 8374(1)  | 32(1) |
| C(7)  | 2917(1) | 5990(1)  | 7217(1)  | 29(1) |
| C(8)  | 1477(2) | 7176(1)  | 7005(1)  | 31(1) |
| C(9)  | 1461(2) | 8092(1)  | 5847(1)  | 30(1) |
| C(10) | 1918(1) | 7217(1)  | 5053(1)  | 28(1) |
| C(11) | 3661(1) | 6399(1)  | 5261(1)  | 28(1) |
| C(12) | 1751(1) | 7995(1)  | 3852(1)  | 28(1) |
| C(13) | 1476(2) | 7377(1)  | 3076(1)  | 34(1) |
| C(14) | 1418(2) | 8154(2)  | 1983(1)  | 40(1) |
| C(15) | 1631(2) | 9485(2)  | 1696(1)  | 39(1) |
| C(16) | 1857(2) | 10017(1) | 2525(1)  | 35(1) |
| C(17) | 1623(2) | 10317(2) | 562(1)   | 54(1) |
| C(18) | 1201(2) | 5946(2)  | 3397(1)  | 47(1) |
| C(19) | 4998(1) | 7217(1)  | 4823(1)  | 28(1) |
| C(20) | 5638(2) | 7770(1)  | 5490(1)  | 37(1) |
| C(21) | 6848(2) | 8515(2)  | 5064(1)  | 44(1) |
| C(22) | 7461(2) | 8686(1)  | 3976(1)  | 42(1) |
| C(23) | 6859(2) | 8119(1)  | 3309(1)  | 39(1) |
| C(24) | 5634(2) | 7394(1)  | 3729(1)  | 33(1) |
| C(25) | 5259(2) | 1393(2)  | 11676(1) | 53(1) |

Table 3. Bond lengths [ $\text{\AA}$ ] and angles [ $^\circ$ ] for mo\_d8v19040\_0m.

---

|             |            |
|-------------|------------|
| F(1)-C(8)   | 1.3819(14) |
| F(2)-C(8)   | 1.3745(14) |
| O(1)-C(3)   | 1.3668(16) |
| O(1)-C(25)  | 1.4238(19) |
| N(1)-C(7)   | 1.2751(16) |
| N(1)-C(11)  | 1.4625(15) |
| N(2)-C(16)  | 1.3311(16) |
| N(2)-C(12)  | 1.3425(16) |
| N(3)-C(17)  | 1.142(2)   |
| C(1)-C(2)   | 1.3825(19) |
| C(1)-C(6)   | 1.3994(18) |
| C(1)-H(1)   | 0.9500     |
| C(2)-C(3)   | 1.384(2)   |
| C(2)-H(2)   | 0.9500     |
| C(3)-C(4)   | 1.387(2)   |
| C(4)-C(5)   | 1.3795(18) |
| C(4)-H(4)   | 0.9500     |
| C(5)-C(6)   | 1.3891(18) |
| C(5)-H(5)   | 0.9500     |
| C(6)-C(7)   | 1.4885(17) |
| C(7)-C(8)   | 1.5300(17) |
| C(8)-C(9)   | 1.4956(17) |
| C(9)-C(10)  | 1.5219(17) |
| C(9)-H(9A)  | 0.9900     |
| C(9)-H(9B)  | 0.9900     |
| C(10)-C(12) | 1.5059(16) |
| C(10)-C(11) | 1.5528(16) |
| C(10)-H(10) | 1.0000     |
| C(11)-C(19) | 1.5253(17) |
| C(11)-H(11) | 1.0000     |
| C(12)-C(13) | 1.4061(18) |
| C(13)-C(14) | 1.3833(19) |
| C(13)-C(18) | 1.5070(19) |
| C(14)-C(15) | 1.390(2)   |
| C(14)-H(14) | 0.9500     |
| C(15)-C(16) | 1.386(2)   |

|                  |            |
|------------------|------------|
| C(15)-C(17)      | 1.442(2)   |
| C(16)-H(16)      | 0.9500     |
| C(18)-H(18A)     | 0.9800     |
| C(18)-H(18B)     | 0.9800     |
| C(18)-H(18C)     | 0.9800     |
| C(19)-C(20)      | 1.3877(18) |
| C(19)-C(24)      | 1.3917(17) |
| C(20)-C(21)      | 1.387(2)   |
| C(20)-H(20)      | 0.9500     |
| C(21)-C(22)      | 1.380(2)   |
| C(21)-H(21)      | 0.9500     |
| C(22)-C(23)      | 1.380(2)   |
| C(22)-H(22)      | 0.9500     |
| C(23)-C(24)      | 1.3848(19) |
| C(23)-H(23)      | 0.9500     |
| C(24)-H(24)      | 0.9500     |
| C(25)-H(25A)     | 0.9800     |
| C(25)-H(25B)     | 0.9800     |
| C(25)-H(25C)     | 0.9800     |
|                  |            |
| C(3)-O(1)-C(25)  | 117.10(12) |
| C(7)-N(1)-C(11)  | 122.86(10) |
| C(16)-N(2)-C(12) | 118.55(11) |
| C(2)-C(1)-C(6)   | 120.91(13) |
| C(2)-C(1)-H(1)   | 119.5      |
| C(6)-C(1)-H(1)   | 119.5      |
| C(1)-C(2)-C(3)   | 120.49(13) |
| C(1)-C(2)-H(2)   | 119.8      |
| C(3)-C(2)-H(2)   | 119.8      |
| O(1)-C(3)-C(2)   | 116.16(12) |
| O(1)-C(3)-C(4)   | 124.47(13) |
| C(2)-C(3)-C(4)   | 119.37(12) |
| C(5)-C(4)-C(3)   | 119.69(13) |
| C(5)-C(4)-H(4)   | 120.2      |
| C(3)-C(4)-H(4)   | 120.2      |
| C(4)-C(5)-C(6)   | 122.05(12) |
| C(4)-C(5)-H(5)   | 119.0      |
| C(6)-C(5)-H(5)   | 119.0      |

|                   |            |
|-------------------|------------|
| C(5)-C(6)-C(1)    | 117.39(12) |
| C(5)-C(6)-C(7)    | 118.53(11) |
| C(1)-C(6)-C(7)    | 124.02(11) |
| N(1)-C(7)-C(6)    | 118.47(11) |
| N(1)-C(7)-C(8)    | 122.02(11) |
| C(6)-C(7)-C(8)    | 119.49(10) |
| F(2)-C(8)-F(1)    | 104.82(9)  |
| F(2)-C(8)-C(9)    | 109.26(10) |
| F(1)-C(8)-C(9)    | 109.62(10) |
| F(2)-C(8)-C(7)    | 109.65(10) |
| F(1)-C(8)-C(7)    | 107.94(10) |
| C(9)-C(8)-C(7)    | 115.04(10) |
| C(8)-C(9)-C(10)   | 108.11(10) |
| C(8)-C(9)-H(9A)   | 110.1      |
| C(10)-C(9)-H(9A)  | 110.1      |
| C(8)-C(9)-H(9B)   | 110.1      |
| C(10)-C(9)-H(9B)  | 110.1      |
| H(9A)-C(9)-H(9B)  | 108.4      |
| C(12)-C(10)-C(9)  | 114.07(10) |
| C(12)-C(10)-C(11) | 112.03(10) |
| C(9)-C(10)-C(11)  | 107.75(10) |
| C(12)-C(10)-H(10) | 107.6      |
| C(9)-C(10)-H(10)  | 107.6      |
| C(11)-C(10)-H(10) | 107.6      |
| N(1)-C(11)-C(19)  | 108.87(10) |
| N(1)-C(11)-C(10)  | 112.96(10) |
| C(19)-C(11)-C(10) | 115.02(9)  |
| N(1)-C(11)-H(11)  | 106.5      |
| C(19)-C(11)-H(11) | 106.5      |
| C(10)-C(11)-H(11) | 106.5      |
| N(2)-C(12)-C(13)  | 123.10(11) |
| N(2)-C(12)-C(10)  | 115.57(11) |
| C(13)-C(12)-C(10) | 121.32(11) |
| C(14)-C(13)-C(12) | 117.16(12) |
| C(14)-C(13)-C(18) | 120.11(12) |
| C(12)-C(13)-C(18) | 122.70(12) |
| C(13)-C(14)-C(15) | 119.82(13) |
| C(13)-C(14)-H(14) | 120.1      |

|                     |            |
|---------------------|------------|
| C(15)-C(14)-H(14)   | 120.1      |
| C(16)-C(15)-C(14)   | 118.86(12) |
| C(16)-C(15)-C(17)   | 119.62(14) |
| C(14)-C(15)-C(17)   | 121.51(14) |
| N(2)-C(16)-C(15)    | 122.45(12) |
| N(2)-C(16)-H(16)    | 118.8      |
| C(15)-C(16)-H(16)   | 118.8      |
| N(3)-C(17)-C(15)    | 178.58(19) |
| C(13)-C(18)-H(18A)  | 109.5      |
| C(13)-C(18)-H(18B)  | 109.5      |
| H(18A)-C(18)-H(18B) | 109.5      |
| C(13)-C(18)-H(18C)  | 109.5      |
| H(18A)-C(18)-H(18C) | 109.5      |
| H(18B)-C(18)-H(18C) | 109.5      |
| C(20)-C(19)-C(24)   | 118.30(12) |
| C(20)-C(19)-C(11)   | 122.11(11) |
| C(24)-C(19)-C(11)   | 119.57(11) |
| C(21)-C(20)-C(19)   | 120.70(13) |
| C(21)-C(20)-H(20)   | 119.7      |
| C(19)-C(20)-H(20)   | 119.7      |
| C(22)-C(21)-C(20)   | 120.27(14) |
| C(22)-C(21)-H(21)   | 119.9      |
| C(20)-C(21)-H(21)   | 119.9      |
| C(21)-C(22)-C(23)   | 119.73(13) |
| C(21)-C(22)-H(22)   | 120.1      |
| C(23)-C(22)-H(22)   | 120.1      |
| C(22)-C(23)-C(24)   | 119.96(13) |
| C(22)-C(23)-H(23)   | 120.0      |
| C(24)-C(23)-H(23)   | 120.0      |
| C(23)-C(24)-C(19)   | 121.01(13) |
| C(23)-C(24)-H(24)   | 119.5      |
| C(19)-C(24)-H(24)   | 119.5      |
| O(1)-C(25)-H(25A)   | 109.5      |
| O(1)-C(25)-H(25B)   | 109.5      |
| H(25A)-C(25)-H(25B) | 109.5      |
| O(1)-C(25)-H(25C)   | 109.5      |
| H(25A)-C(25)-H(25C) | 109.5      |
| H(25B)-C(25)-H(25C) | 109.5      |

Table 4. Torsion angles [°] for mo\_d8v19040\_0m.

|                         |             |
|-------------------------|-------------|
| C(6)-C(1)-C(2)-C(3)     | -0.6(2)     |
| C(25)-O(1)-C(3)-C(2)    | 170.93(14)  |
| C(25)-O(1)-C(3)-C(4)    | -9.5(2)     |
| C(1)-C(2)-C(3)-O(1)     | -177.58(13) |
| C(1)-C(2)-C(3)-C(4)     | 2.8(2)      |
| O(1)-C(3)-C(4)-C(5)     | 178.17(13)  |
| C(2)-C(3)-C(4)-C(5)     | -2.2(2)     |
| C(3)-C(4)-C(5)-C(6)     | -0.6(2)     |
| C(4)-C(5)-C(6)-C(1)     | 2.7(2)      |
| C(4)-C(5)-C(6)-C(7)     | -174.52(12) |
| C(2)-C(1)-C(6)-C(5)     | -2.1(2)     |
| C(2)-C(1)-C(6)-C(7)     | 174.92(13)  |
| C(11)-N(1)-C(7)-C(6)    | 178.74(11)  |
| C(11)-N(1)-C(7)-C(8)    | 0.04(18)    |
| C(5)-C(6)-C(7)-N(1)     | 9.16(18)    |
| C(1)-C(6)-C(7)-N(1)     | -167.88(13) |
| C(5)-C(6)-C(7)-C(8)     | -172.11(12) |
| C(1)-C(6)-C(7)-C(8)     | 10.86(19)   |
| N(1)-C(7)-C(8)-F(2)     | -135.68(12) |
| C(6)-C(7)-C(8)-F(2)     | 45.64(15)   |
| N(1)-C(7)-C(8)-F(1)     | 110.67(13)  |
| C(6)-C(7)-C(8)-F(1)     | -68.01(14)  |
| N(1)-C(7)-C(8)-C(9)     | -12.07(17)  |
| C(6)-C(7)-C(8)-C(9)     | 169.25(11)  |
| F(2)-C(8)-C(9)-C(10)    | 167.26(10)  |
| F(1)-C(8)-C(9)-C(10)    | -78.39(12)  |
| C(7)-C(8)-C(9)-C(10)    | 43.45(14)   |
| C(8)-C(9)-C(10)-C(12)   | 172.76(10)  |
| C(8)-C(9)-C(10)-C(11)   | -62.19(12)  |
| C(7)-N(1)-C(11)-C(19)   | 108.23(13)  |
| C(7)-N(1)-C(11)-C(10)   | -20.84(16)  |
| C(12)-C(10)-C(11)-N(1)  | 178.18(10)  |
| C(9)-C(10)-C(11)-N(1)   | 51.92(13)   |
| C(12)-C(10)-C(11)-C(19) | 52.34(14)   |
| C(9)-C(10)-C(11)-C(19)  | -73.92(13)  |



|                         |             |
|-------------------------|-------------|
| C(16)-N(2)-C(12)-C(13)  | -2.21(17)   |
| C(16)-N(2)-C(12)-C(10)  | 176.67(10)  |
| C(9)-C(10)-C(12)-N(2)   | 27.09(15)   |
| C(11)-C(10)-C(12)-N(2)  | -95.66(12)  |
| C(9)-C(10)-C(12)-C(13)  | -154.00(11) |
| C(11)-C(10)-C(12)-C(13) | 83.24(14)   |
| N(2)-C(12)-C(13)-C(14)  | 1.90(18)    |
| C(10)-C(12)-C(13)-C(14) | -176.92(11) |
| N(2)-C(12)-C(13)-C(18)  | -176.28(12) |
| C(10)-C(12)-C(13)-C(18) | 4.90(18)    |
| C(12)-C(13)-C(14)-C(15) | 0.09(19)    |
| C(18)-C(13)-C(14)-C(15) | 178.32(13)  |
| C(13)-C(14)-C(15)-C(16) | -1.6(2)     |
| C(13)-C(14)-C(15)-C(17) | 178.33(13)  |
| C(12)-N(2)-C(16)-C(15)  | 0.52(18)    |
| C(14)-C(15)-C(16)-N(2)  | 1.4(2)      |
| C(17)-C(15)-C(16)-N(2)  | -178.58(13) |
| N(1)-C(11)-C(19)-C(20)  | -32.66(15)  |
| C(10)-C(11)-C(19)-C(20) | 95.26(14)   |
| N(1)-C(11)-C(19)-C(24)  | 145.72(11)  |
| C(10)-C(11)-C(19)-C(24) | -86.36(13)  |
| C(24)-C(19)-C(20)-C(21) | 1.91(19)    |
| C(11)-C(19)-C(20)-C(21) | -179.68(12) |
| C(19)-C(20)-C(21)-C(22) | -1.6(2)     |
| C(20)-C(21)-C(22)-C(23) | 0.3(2)      |
| C(21)-C(22)-C(23)-C(24) | 0.7(2)      |
| C(22)-C(23)-C(24)-C(19) | -0.40(19)   |
| C(20)-C(19)-C(24)-C(23) | -0.90(18)   |
| C(11)-C(19)-C(24)-C(23) | -179.35(11) |

---

## 7. Reference

- [1] Wu, Y.; Deng, L. Asymmetric Synthesis of Trifluoromethylated Amines via Catalytic Enantioselective Isomerization of Imines. *J. Am. Chem. Soc.* **2012**, *134*, 14334–14337.
- [2] Saxena, A.; Choi, B.; Lam, H. W. Enantioselective Copper-Catalyzed Reductive Coupling of Alkenylazaarenes with Ketones. *J. Am. Chem. Soc.* **2012**, *134*, 8428–8431.
- [3] Peng, Y.; Qin, C.; Chen, X.; Li, J.; Li, H.; Wang, W. Iron-Catalyzed Anti-Markovnikov Hydroamination of Vinylpyridines. *Asian J. Org. Chem.* **2017**, *6*, 694–697.
- [4] Frisch, M. J.; Trucks, G. W.; Schlegel, H. B. et al. Gaussian 16, Revision A.03. Gaussian, Inc., Wallingford CT, 2016.
- [5] Becke, A. D. Density-functional exchange-energy approximation with correct asymptotic behaviour. *Phys. Rev. A.* **1988**, *38*, 3098–3100.
- [6] Becke, A. D. Density-functional thermochemistry. III. The role of exact exchange. *J. Chem. Phys.* **1993**, *98*, 5648–5652.
- [7] Perdew, J. P. Density-functional approximation for the correlation energy of the inhomogeneous electron gas. *Phys. Rev. B.* **1986**, *33*, 8822–8824.
- [8] Krishnan, R.; Frisch, M. J.; Pople, J. A. Contribution of triple substitutions to the electron correlation energy in fourth order perturbation theory. *J. Chem. Phys.* **1980**, *72*, 4244–4245.
- [9] Schäfer, A.; Huber, C.; Ahlrichs, R. Fully optimized contracted Gaussian basis sets of triple zeta valence quality for atoms Li to Kr. *J. Chem. Phys.* **1994**, *100*, 5829–5835.

## 8. $^1\text{H}$ , $^{13}\text{C}$ and $^{19}\text{F}$ NMR spectra

### 3-Methoxy-2-vinylpyridine (2b) [ $^1\text{H}$ \_NMR\_400 MHz\_( $\text{CDCl}_3$ : 7.26 ppm)]

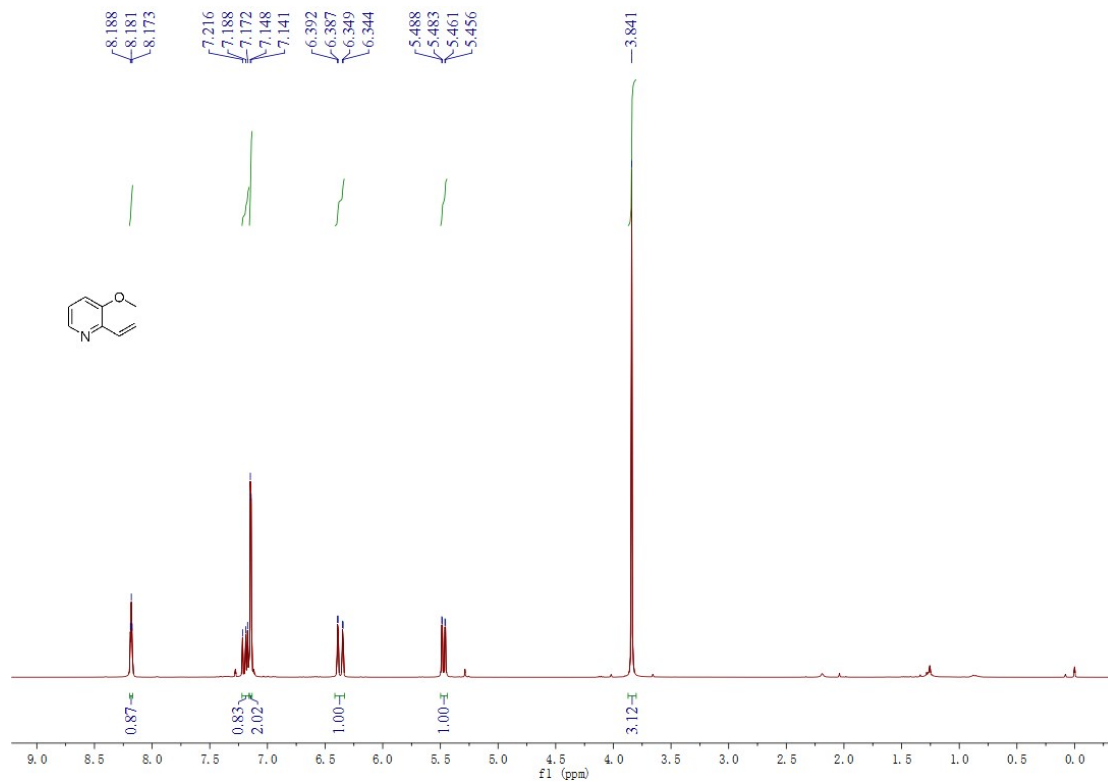

### [ $^{13}\text{C}$ \_NMR\_100 MHz\_( $\text{CDCl}_3$ : 77.00 ppm)]

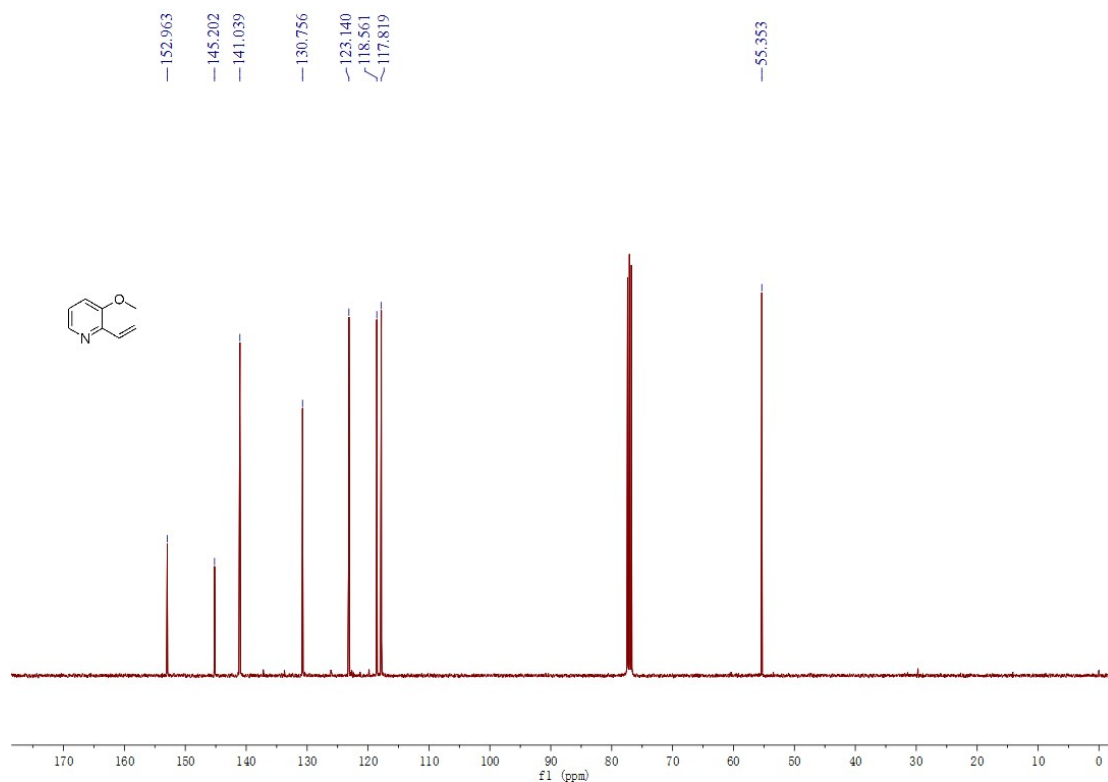

**5-Methoxy-2-vinylpyridine (2c)** [ $^1\text{H\_NMR\_400 MHz\_}(\text{CDCl}_3: 7.26 \text{ ppm})$ ]

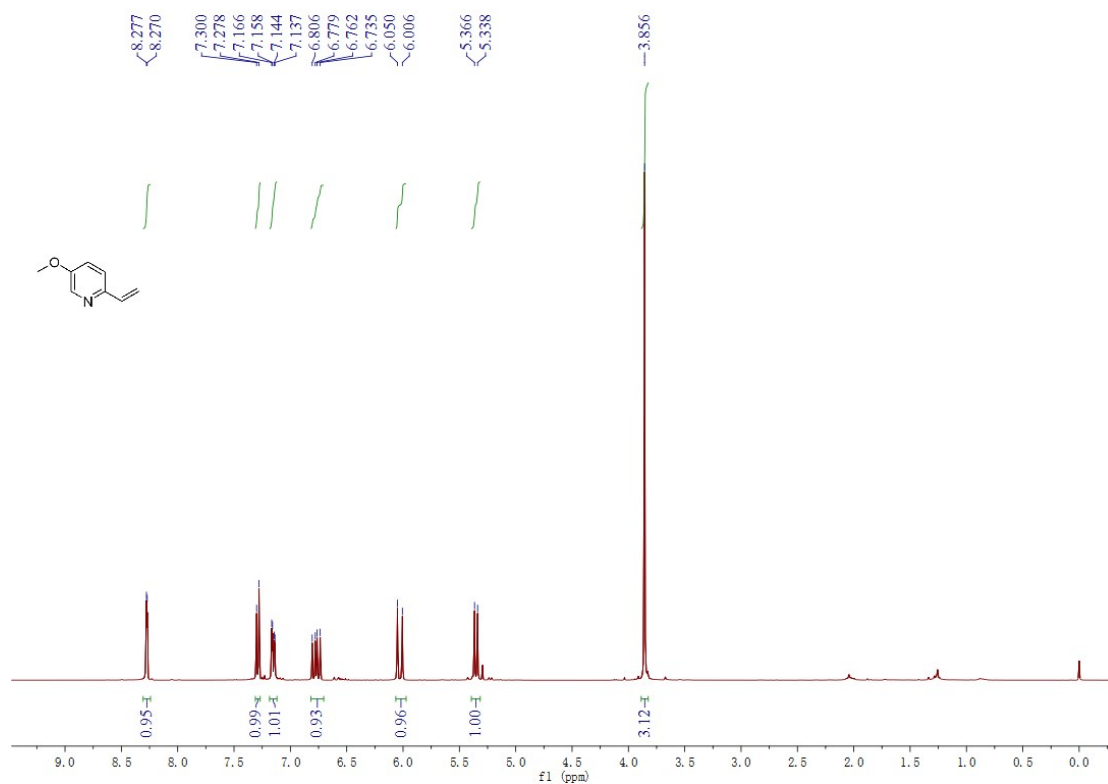

**[ $^{13}\text{C\_NMR\_100 MHz\_}(\text{CDCl}_3: 77.00 \text{ ppm})$ ]**

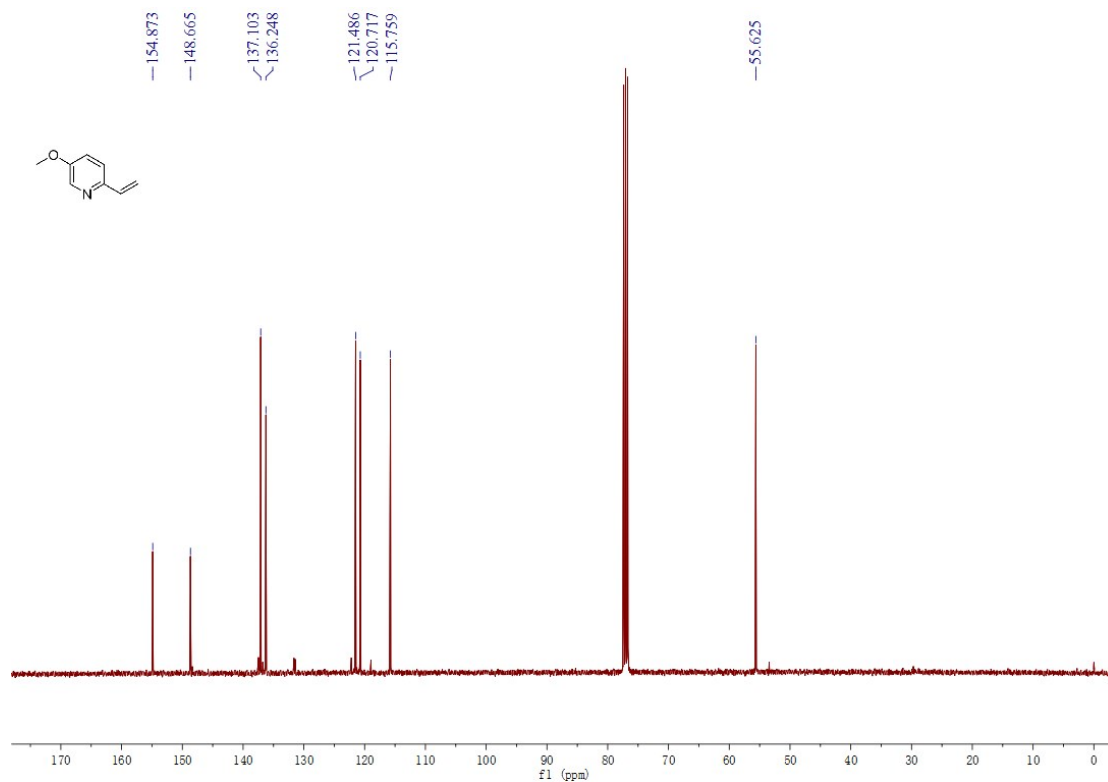

**5-Bromo-3-methyl-2-vinylpyridine (2i)** [ $^1\text{H\_NMR\_400 MHz\_}(\text{CDCl}_3: 7.26 \text{ ppm})$ ]

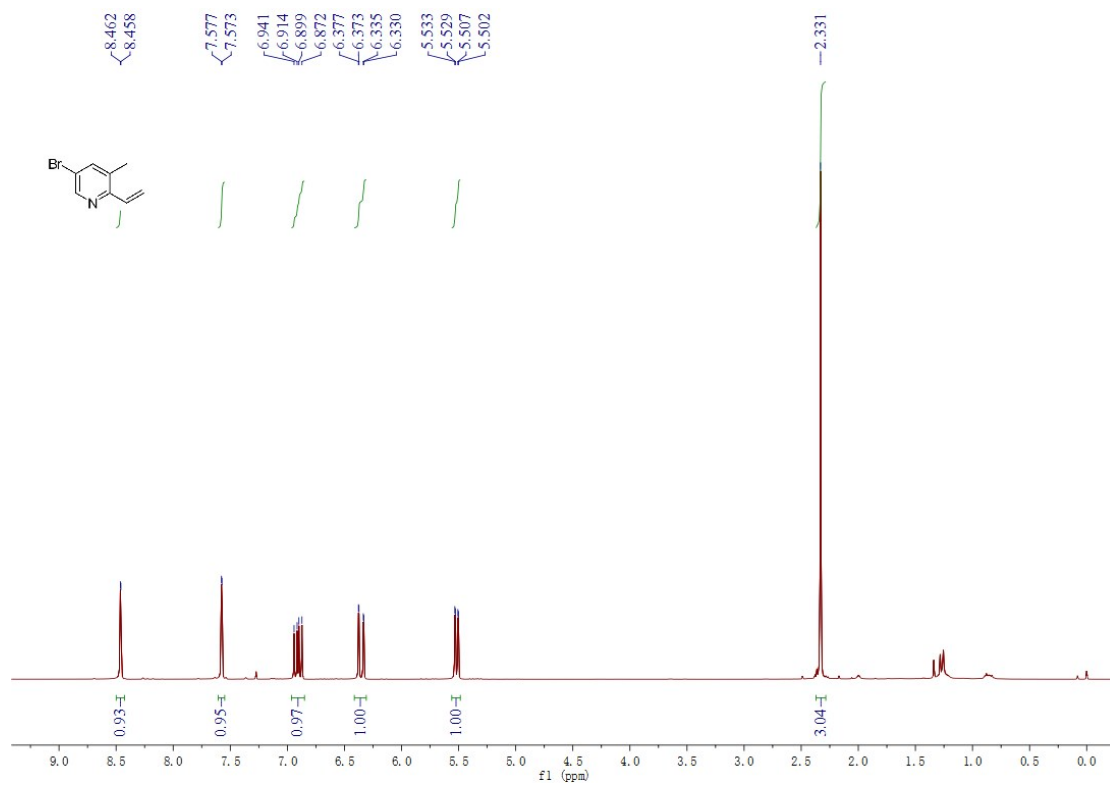

[<sup>13</sup>C\_NMR\_100 MHz\_(CDCl<sub>3</sub>: 77.00 ppm)]

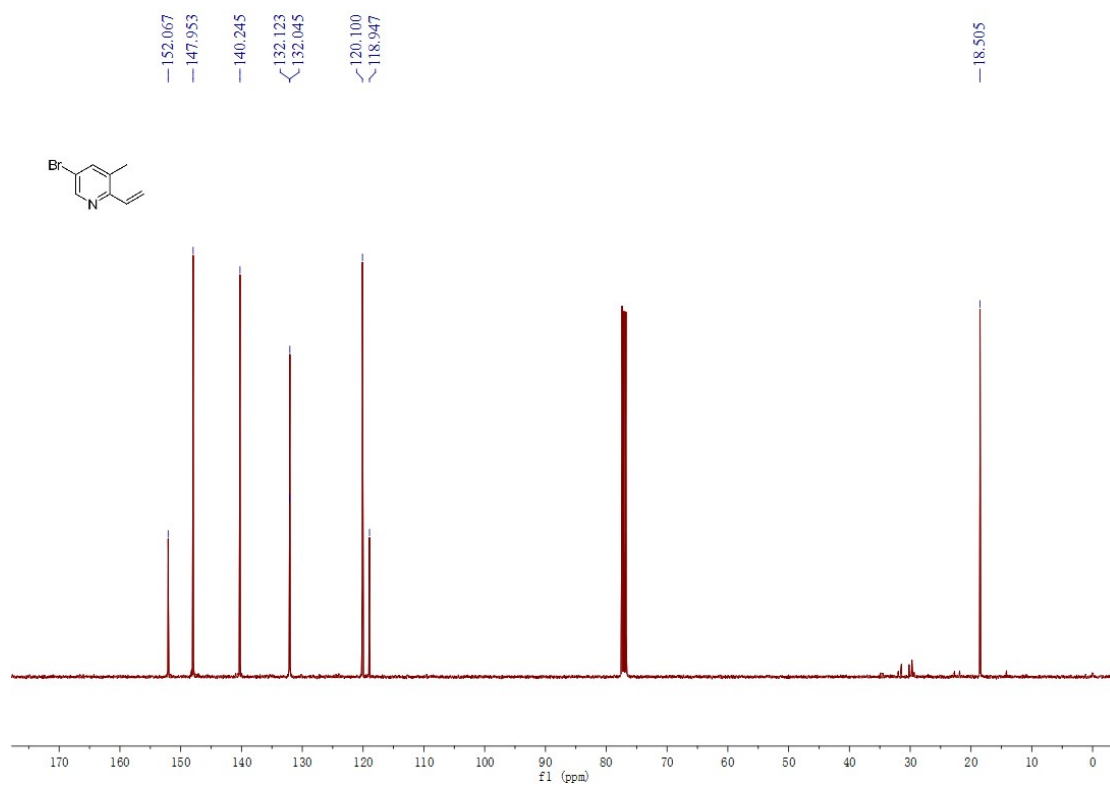

**4-Methyl-2-vinylquinoline (2n)** [<sup>1</sup>H\_NMR\_400 MHz\_(CDCl<sub>3</sub>: 7.26 ppm)]

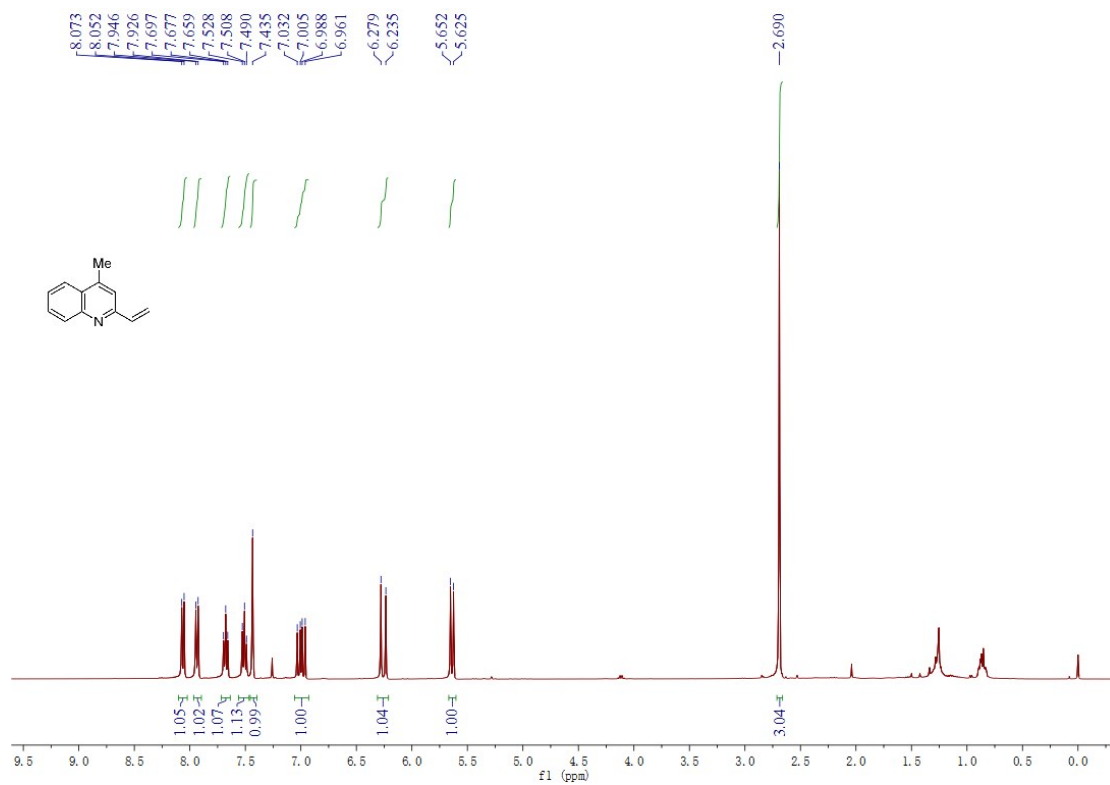

[ $^{13}\text{C}$ \_NMR\_100 MHz\_(CDCl<sub>3</sub>: 77.00 ppm)]

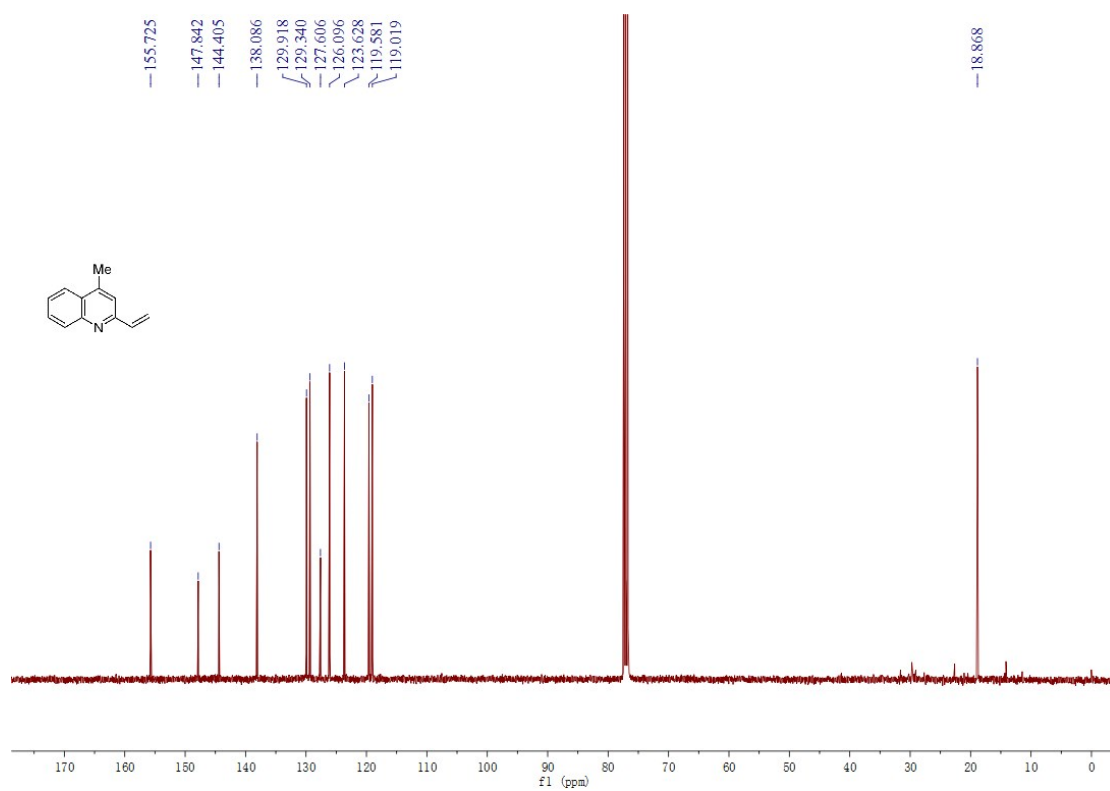

**5',5'-Difluoro-2',6'-diphenyl-2',3',4',5'-tetrahydro-2,3'-bipyridine (3a)**

[ $^1\text{H}$ \_NMR\_400 MHz\_(CDCl<sub>3</sub>: 7.26 ppm)]

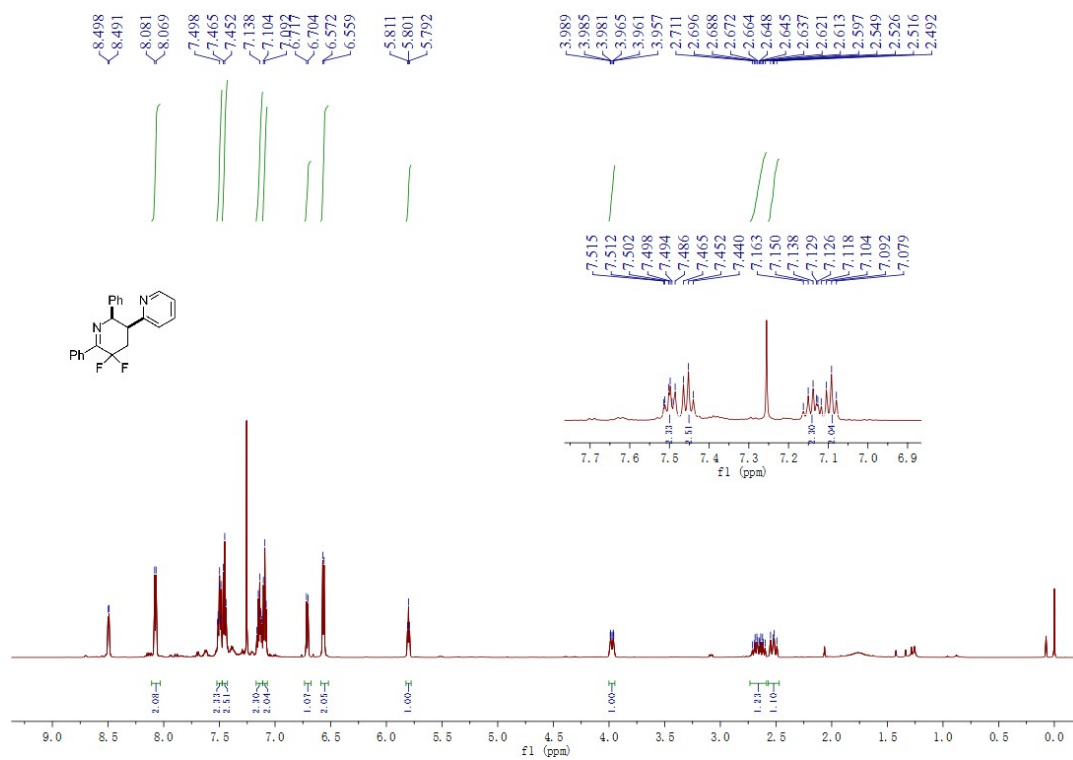

[<sup>13</sup>C\_NMR\_100 MHz\_(CDCl<sub>3</sub>: 77.00 ppm)]

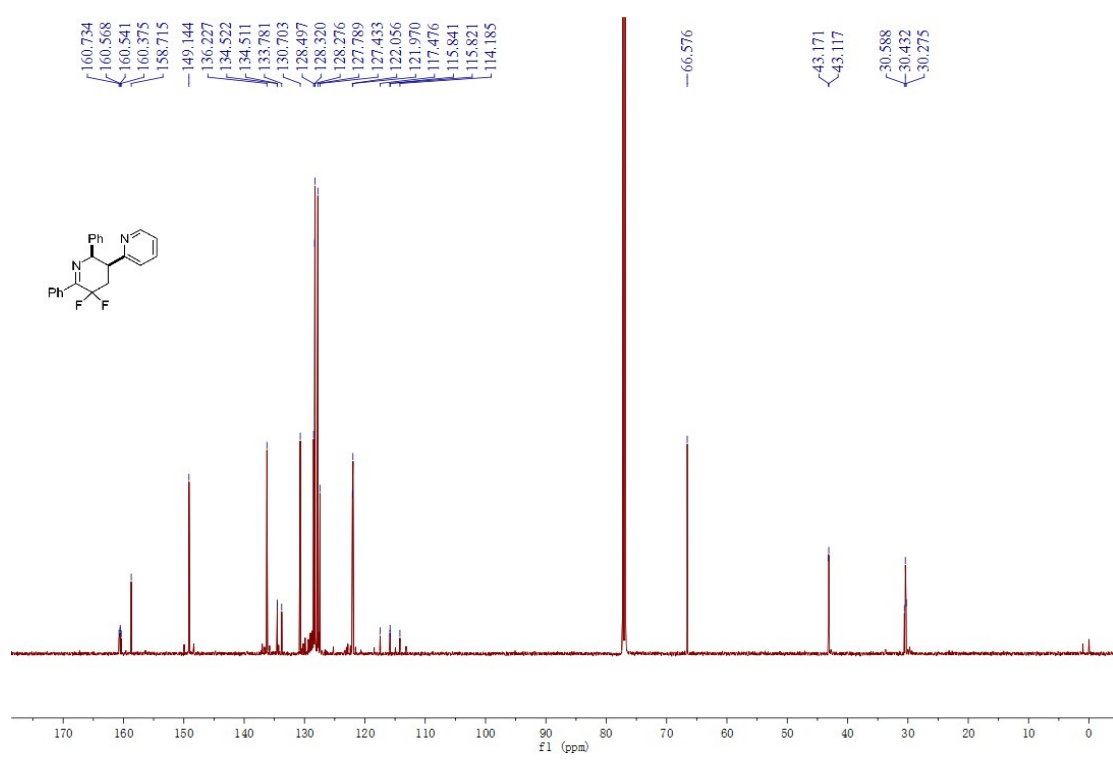

[<sup>19</sup>F\_NMR\_375 MHz]

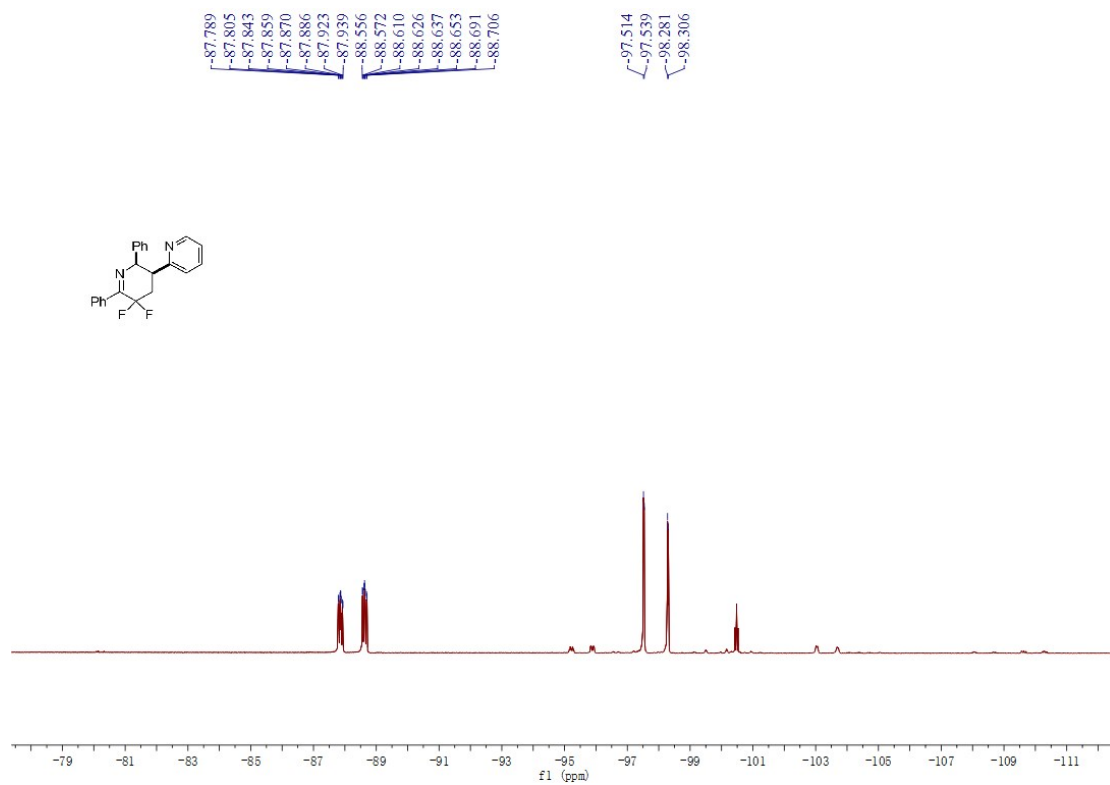

**5',5'-Difluoro-3-methoxy-2',6'-diphenyl-2',3',4',5'-tetrahydro-2,3'-bipyridine (3b)**



[<sup>1</sup>H\_NMR\_400 MHz\_(CDCl<sub>3</sub>: 7.26 ppm)]

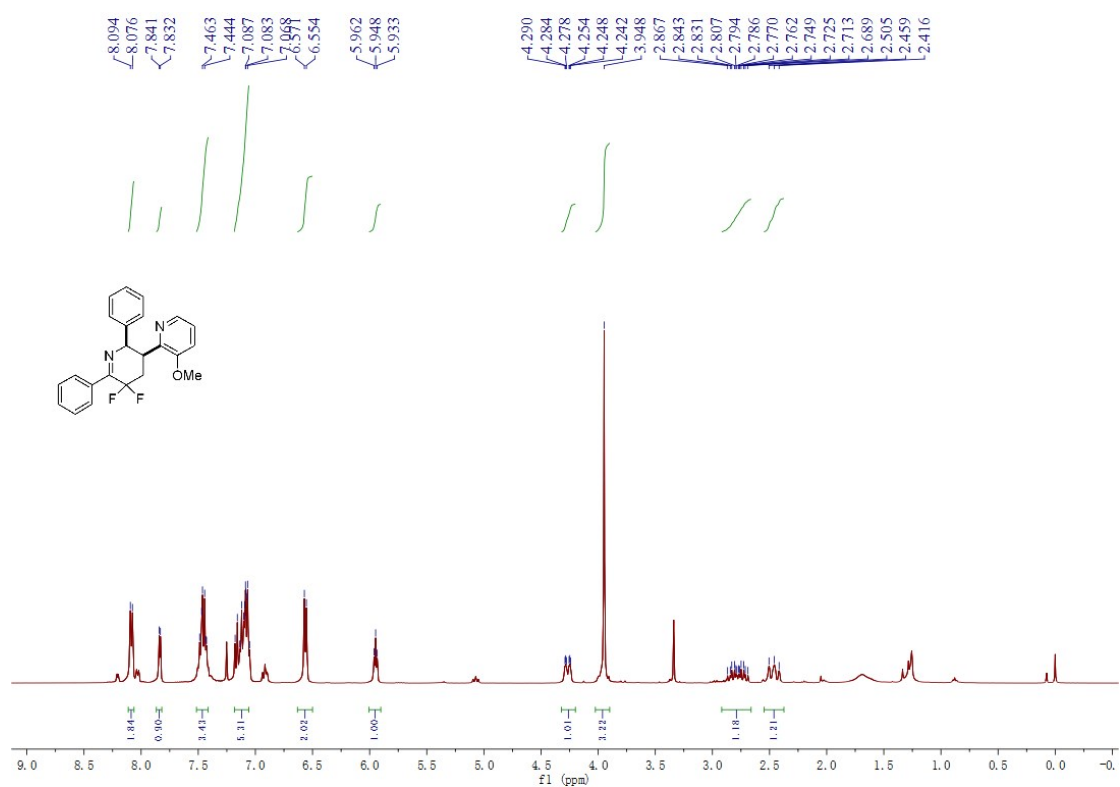

[<sup>13</sup>C\_NMR\_100 MHz\_(CDCl<sub>3</sub>: 77.00 ppm)]

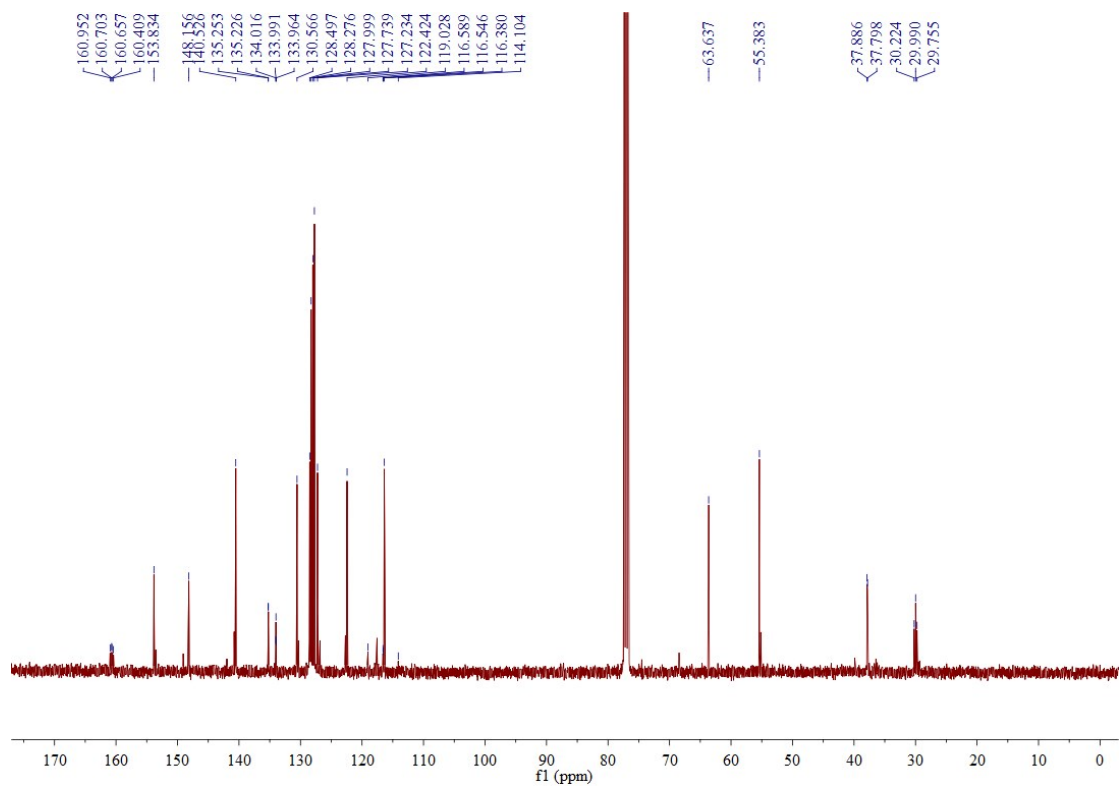

[<sup>19</sup>F\_NMR\_375 MHz]

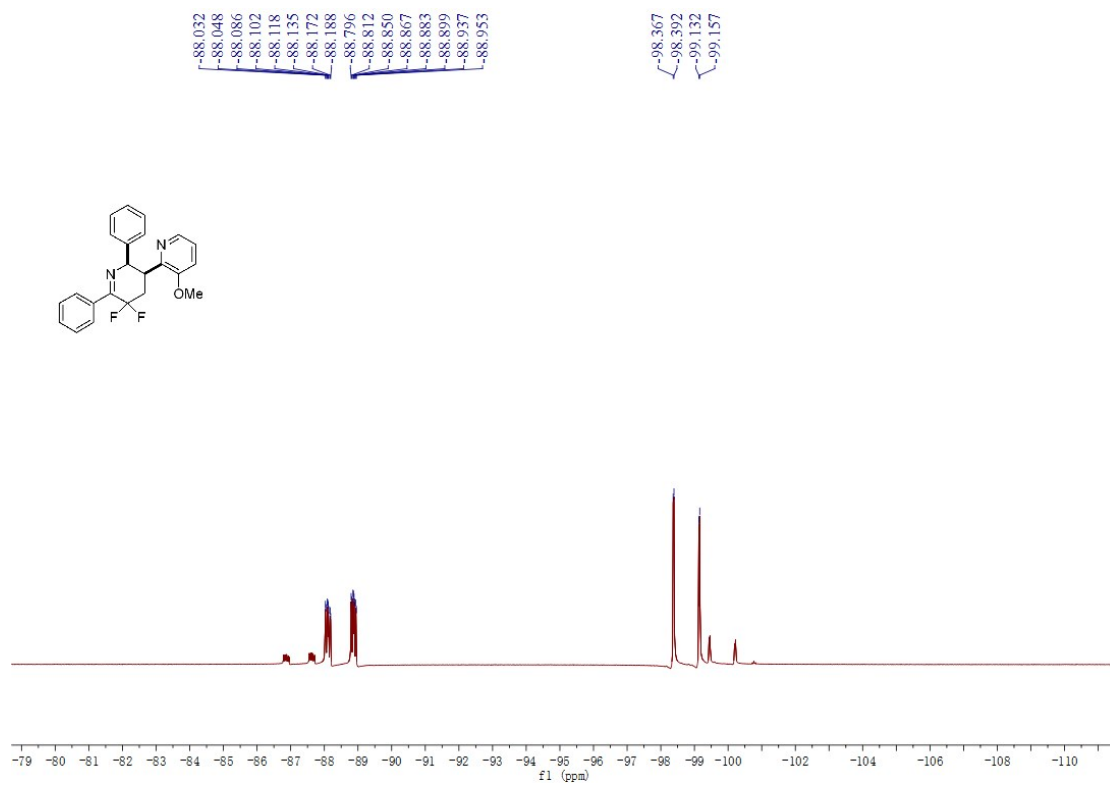

**5',5'-Difluoro-4-methyl-2',6'-diphenyl-2',3',4',5'-tetrahydro-2,3'-bipyridine (3c)**

[<sup>1</sup>H\_NMR\_400 MHz\_(CDCl<sub>3</sub>: 7.26 ppm)]

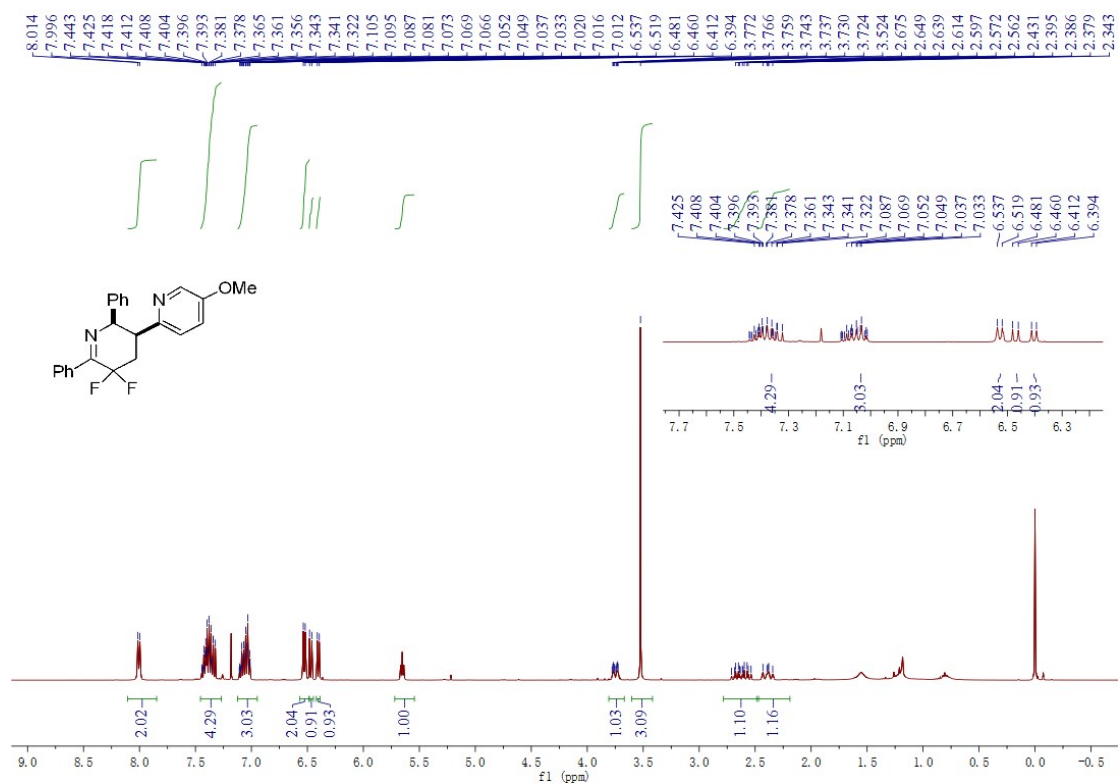

[<sup>13</sup>C\_NMR\_100 MHz\_(CDCl<sub>3</sub>: 77.00 ppm)]

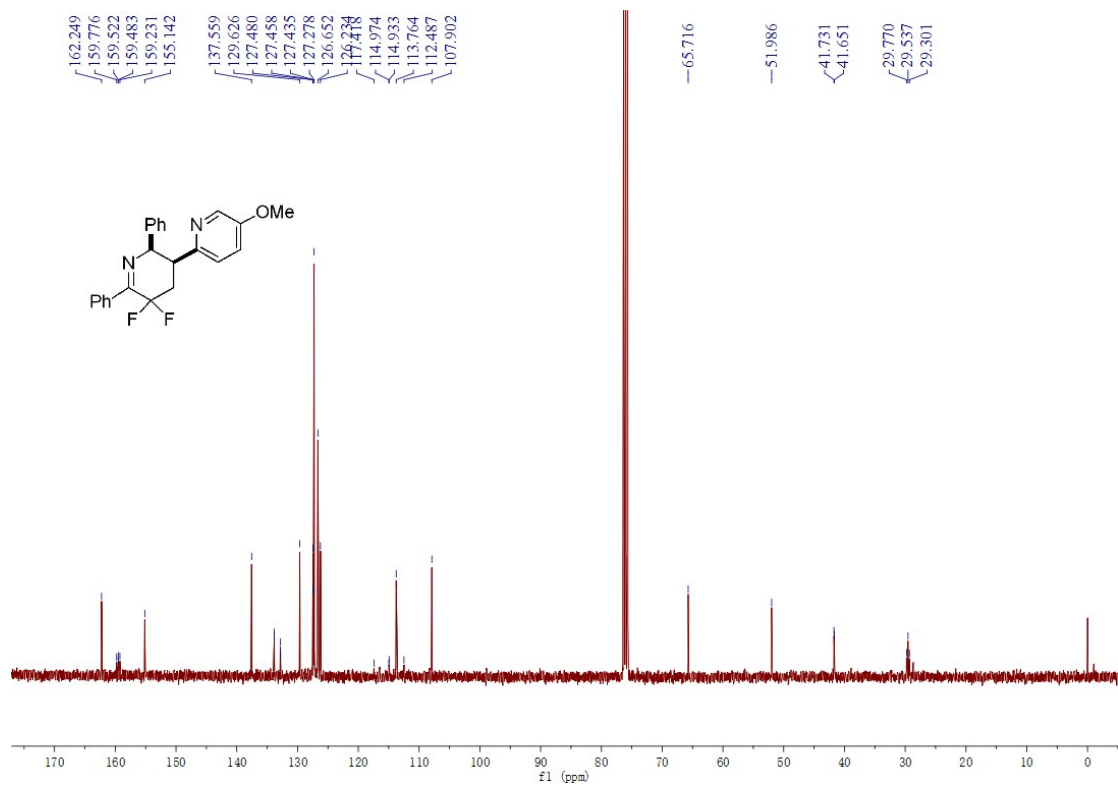

[<sup>19</sup>F\_NMR\_375 MHz]

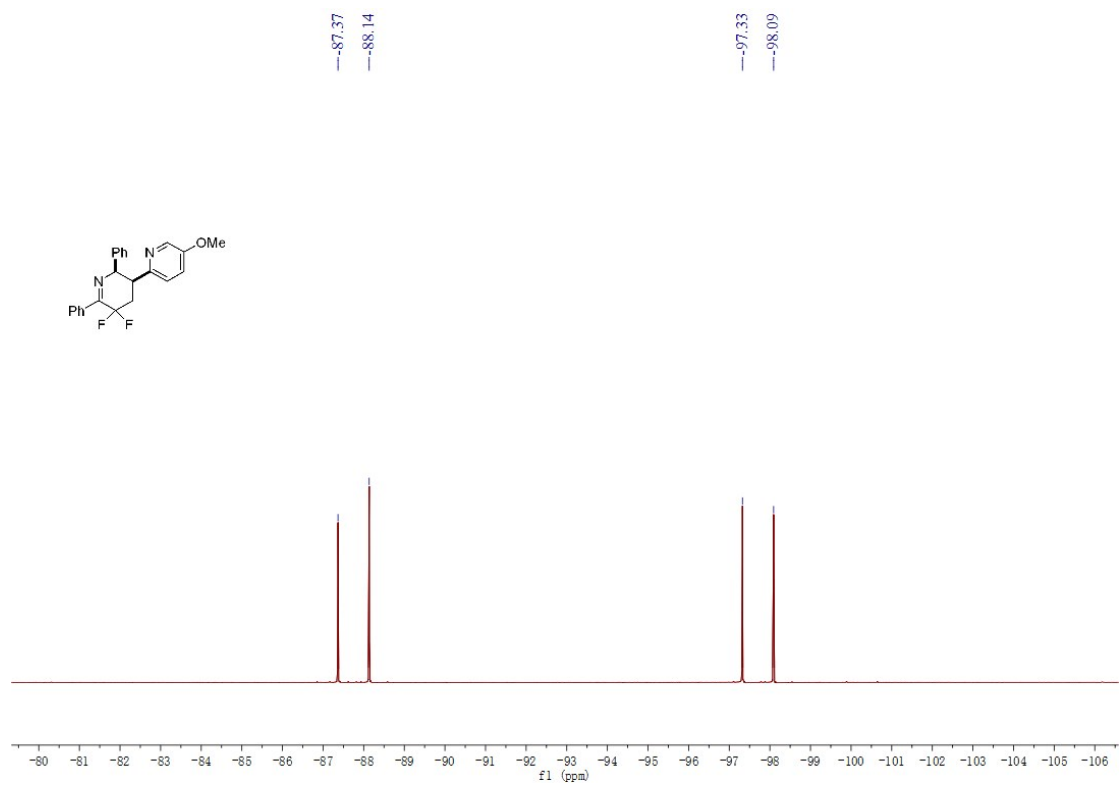

**5',5'-Difluoro-6-methoxy-2',6'-diphenyl-2',3',4',5'-tetrahydro-2,3'-bipyridine**

**(3d)** [<sup>1</sup>H\_NMR\_400 MHz\_(CDCl<sub>3</sub>: 7.26 ppm)]

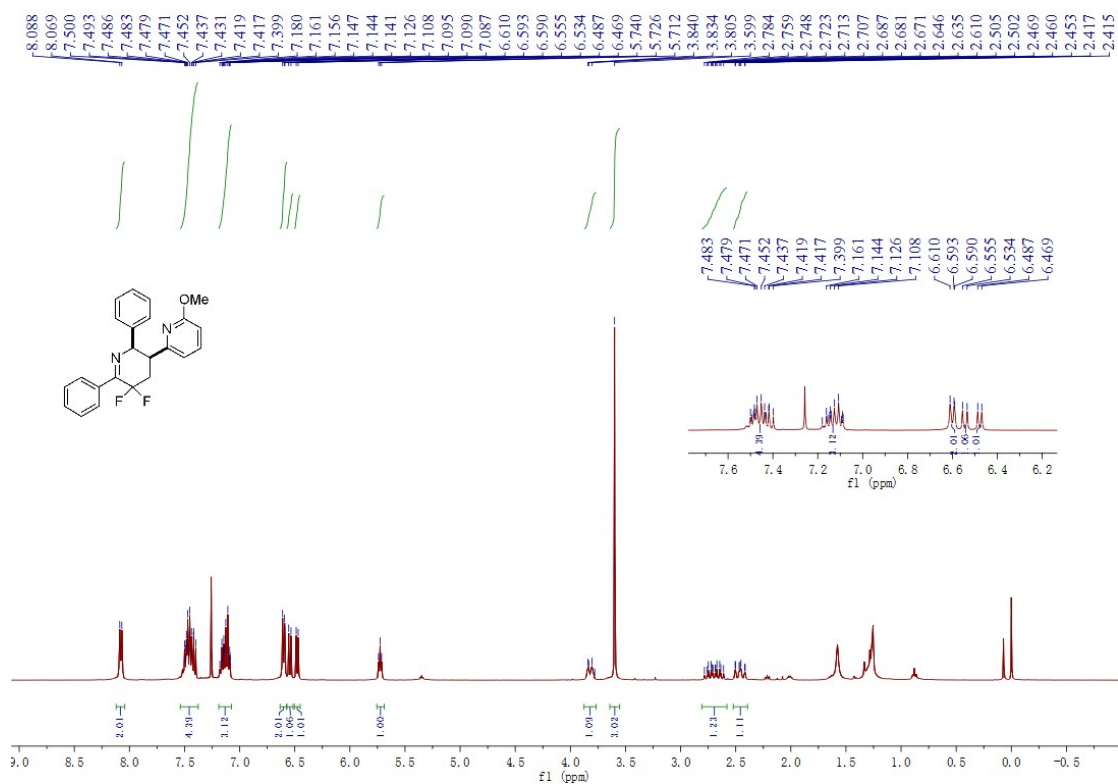

[<sup>13</sup>C\_NMR\_100 MHz\_(CDCl<sub>3</sub>: 77.00 ppm)]

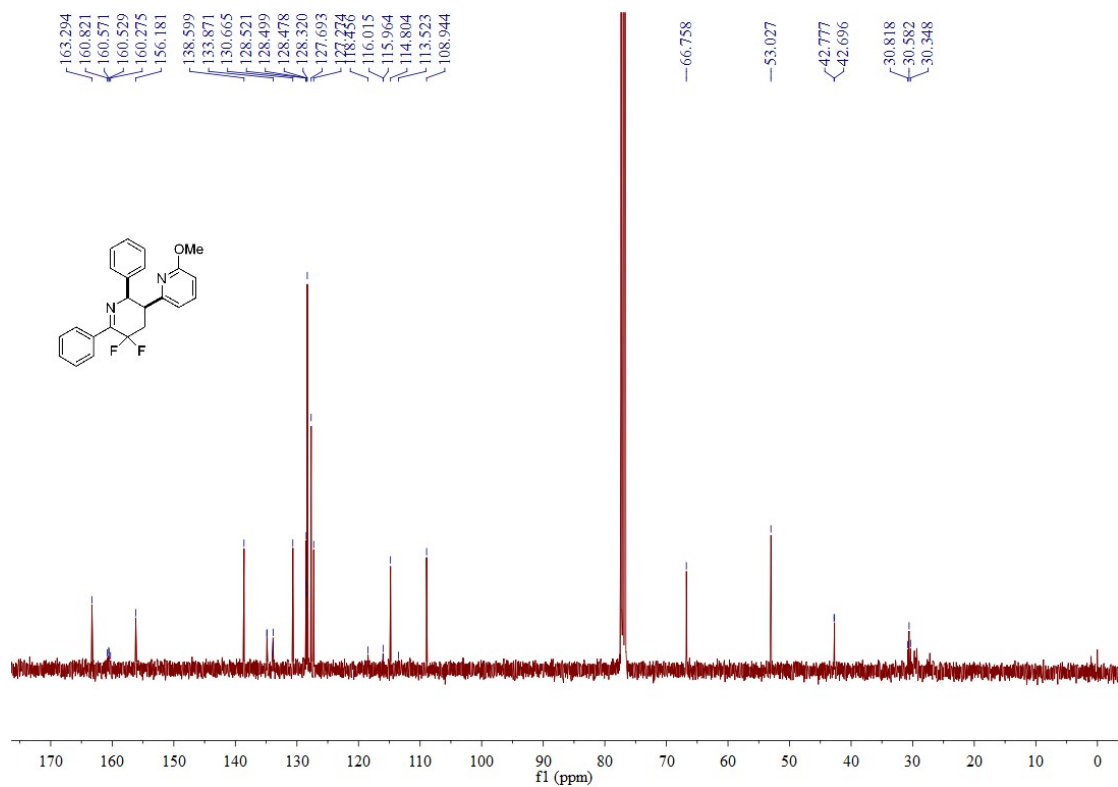

[<sup>19</sup>F\_NMR\_375 MHz]

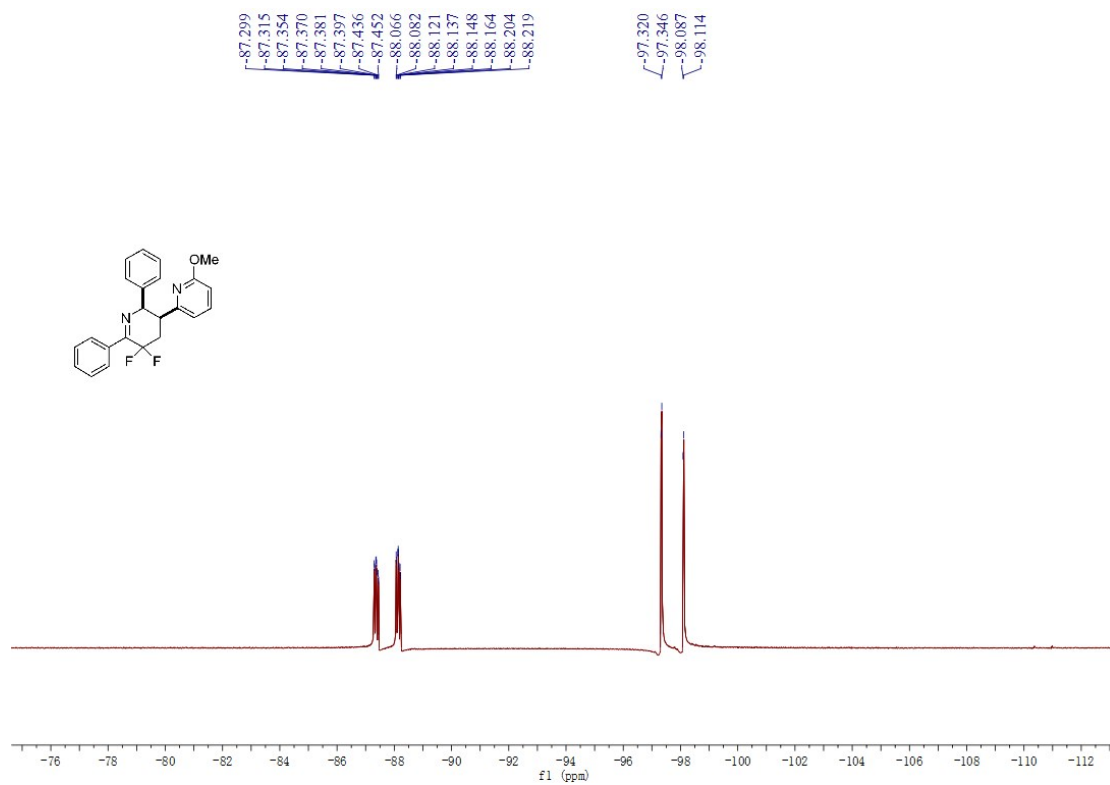

**5',5'-Difluoro-5-methoxy-2',6'-diphenyl-2',3',4',5'-tetrahydro-2,3'-bipyridine (3e)**

[<sup>1</sup>H\_NMR\_400 MHz\_(CDCl<sub>3</sub>: 7.26 ppm)]

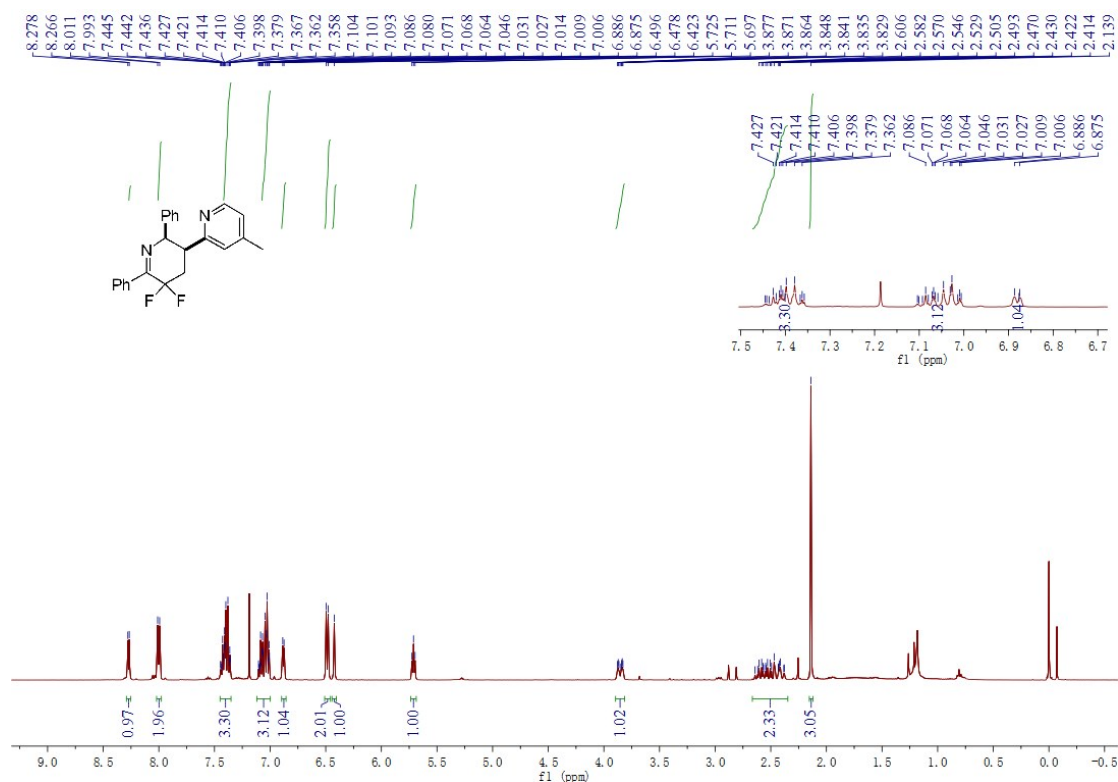

[<sup>13</sup>C\_NMR\_100 MHz\_(CDCl<sub>3</sub>: 77.00 ppm)]

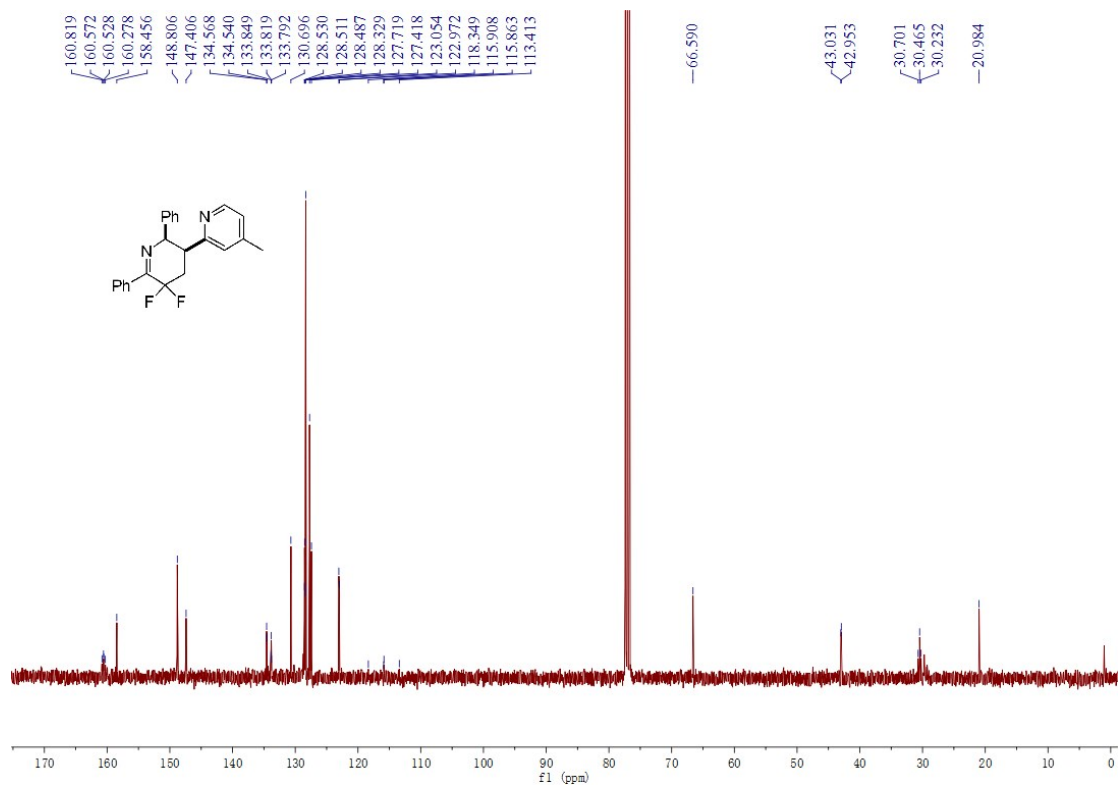

[<sup>19</sup>F\_NMR\_375 MHz]

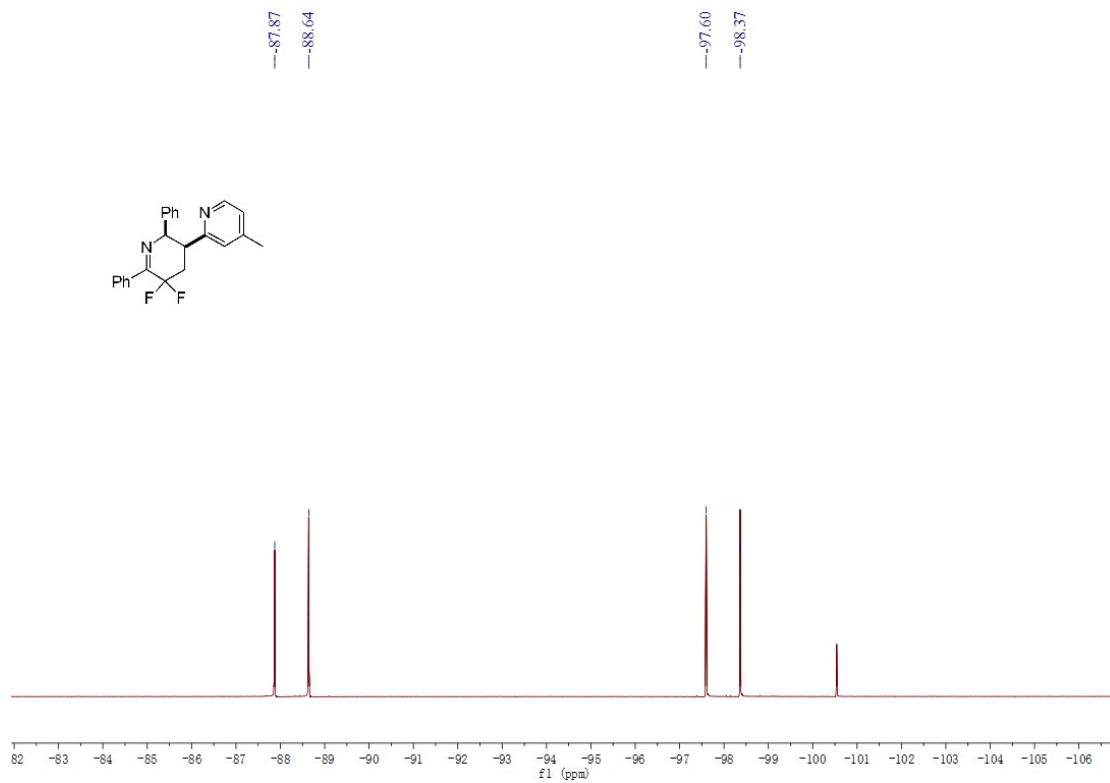

**Methyl-5',5'-difluoro-2',6'-diphenyl-2',3',4',5'-tetrahydro-[2,3'-bipyridine]-5-**



### carboxylate (3f)

[<sup>1</sup>H\_NMR\_400 MHz\_(CDCl<sub>3</sub>: 7.26 ppm)]

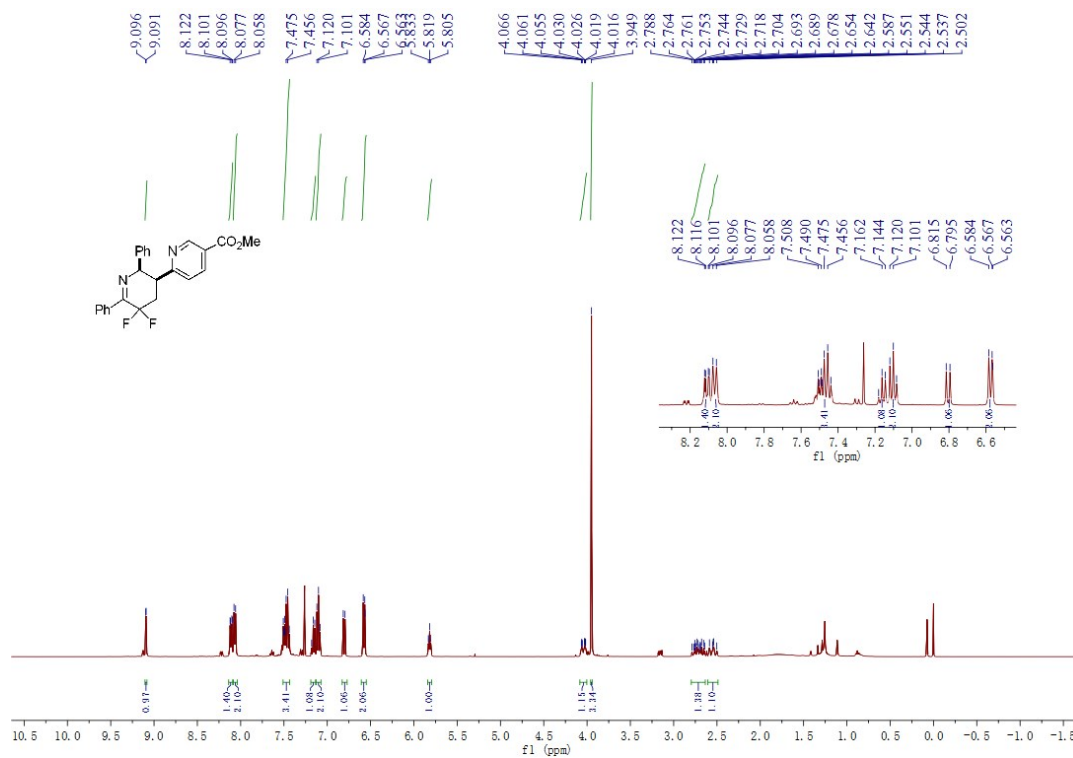

[<sup>13</sup>C\_NMR\_100 MHz\_(CDCl<sub>3</sub>: 77.00 ppm)]

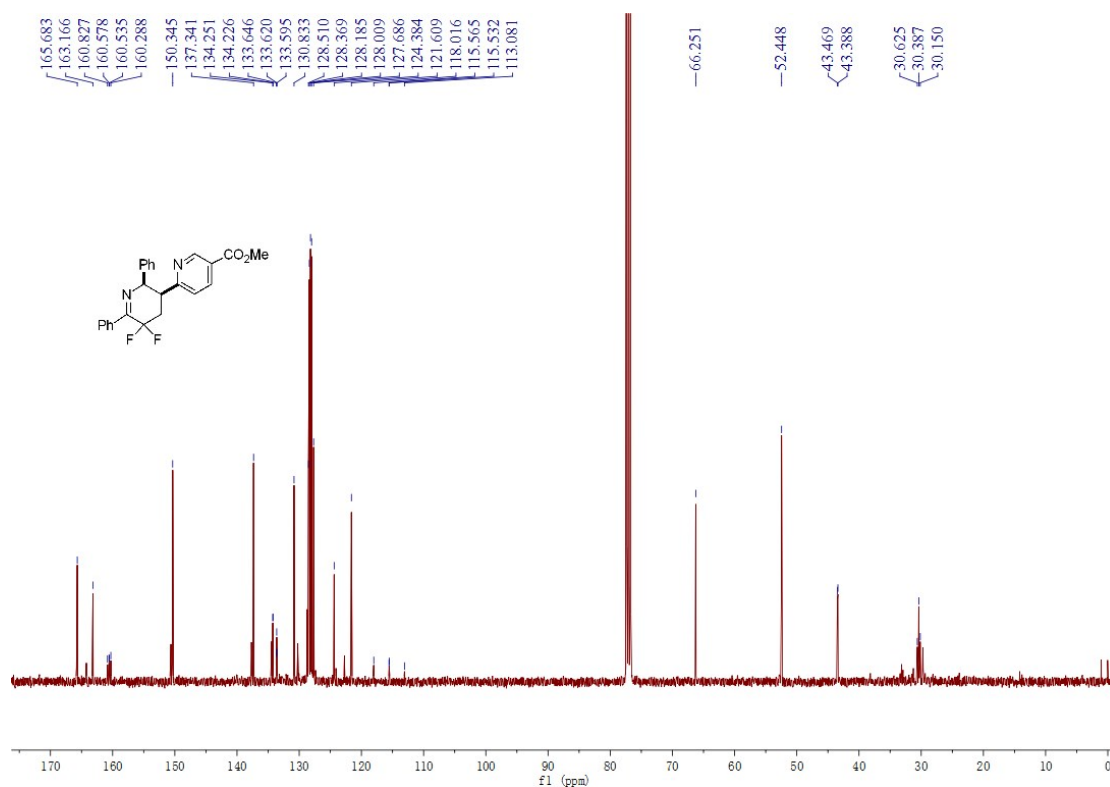

[<sup>19</sup>F\_NMR\_375 MHz]

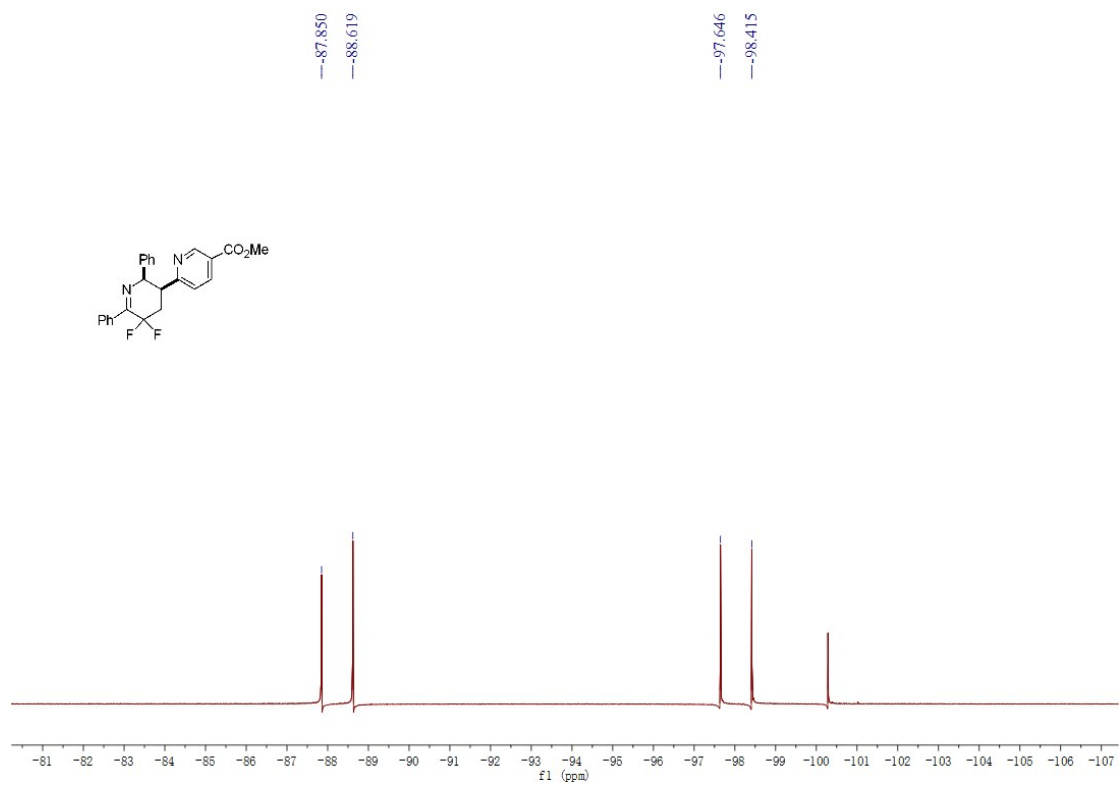

**3-Chloro-5',5'-difluoro-2',6'-diphenyl-2,3,4,5'-tetrahydro-2,3'-bipyridine (3g)**

[<sup>1</sup>H\_NMR\_400 MHz\_(CDCl<sub>3</sub>: 7.26 ppm)]

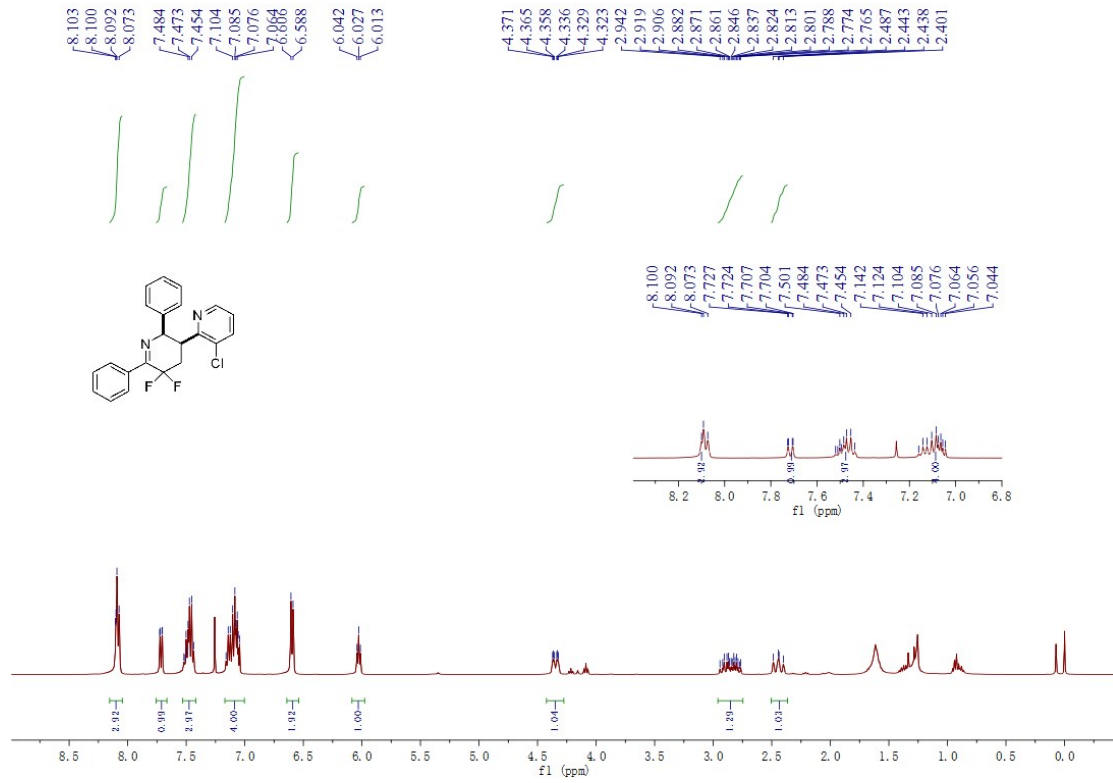

[<sup>13</sup>C\_NMR\_100 MHz\_(CDCl<sub>3</sub>: 77.00 ppm)]

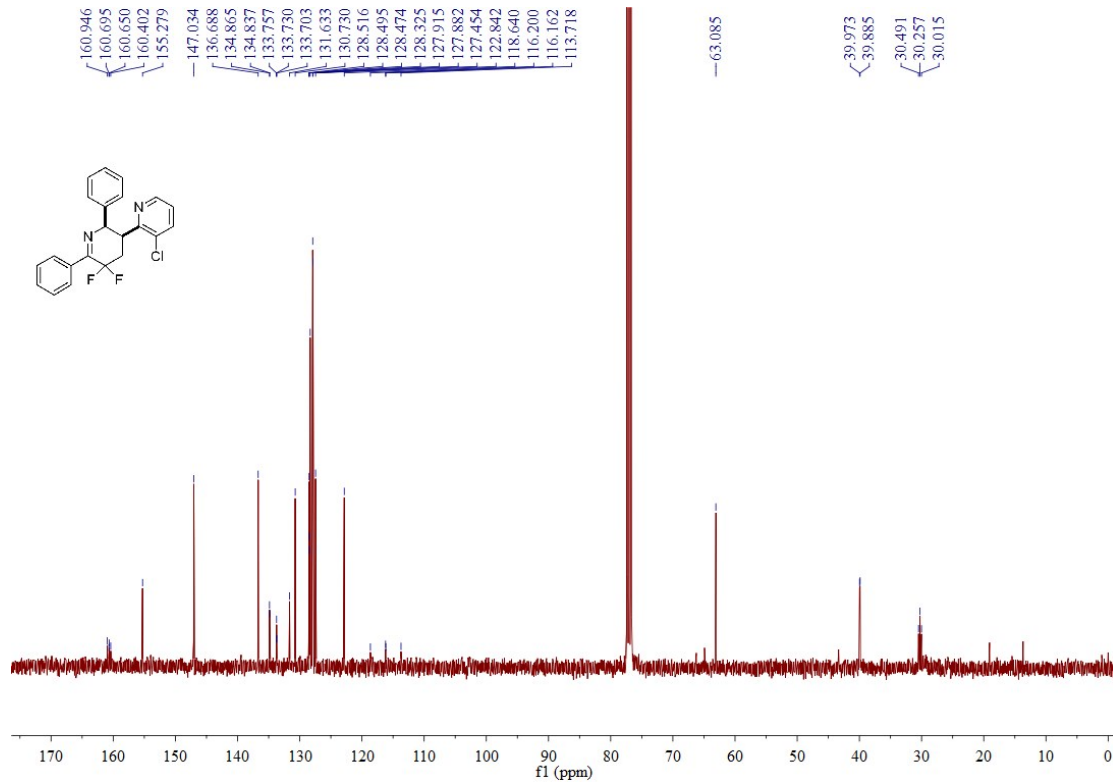

[<sup>19</sup>F\_NMR\_375 MHz]

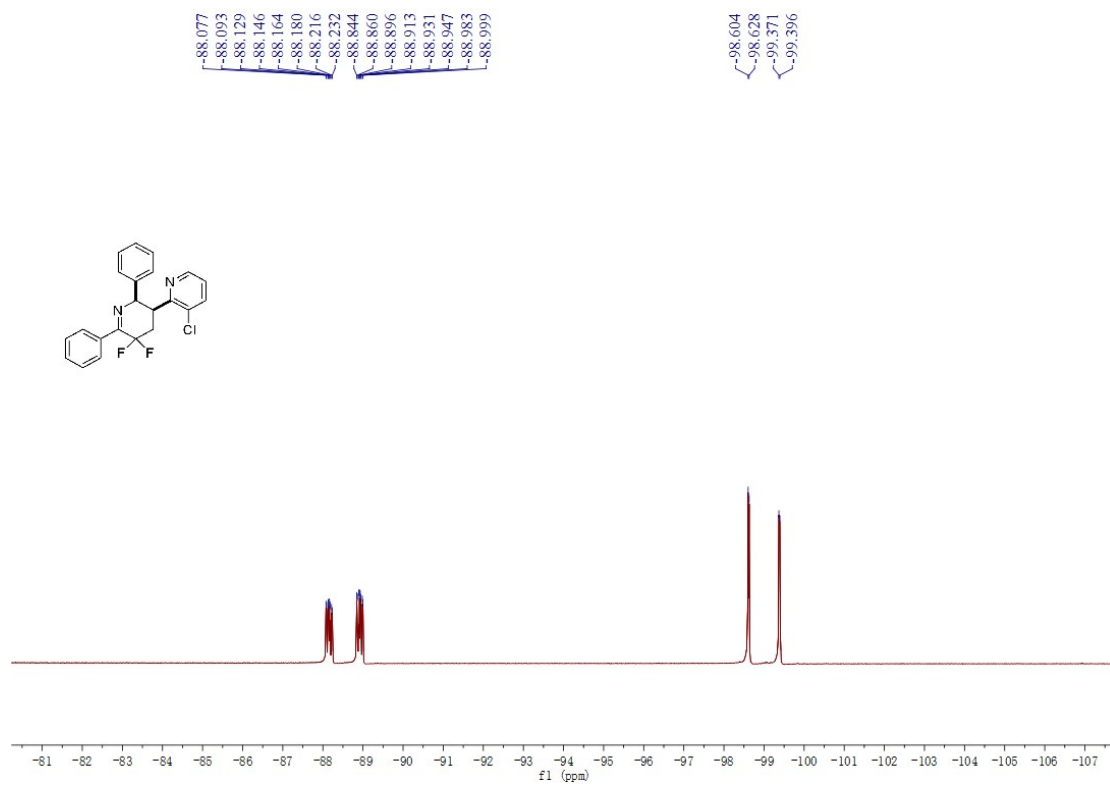

**5',5'-Difluoro-3-methyl-2',6'-diphenyl-2',3',4',5'-tetrahydro-[2,3'-bipyridine]-5-**

### carbonitrile (3h)

[<sup>1</sup>H\_NMR\_400 MHz\_(CDCl<sub>3</sub>: 7.26 ppm)]

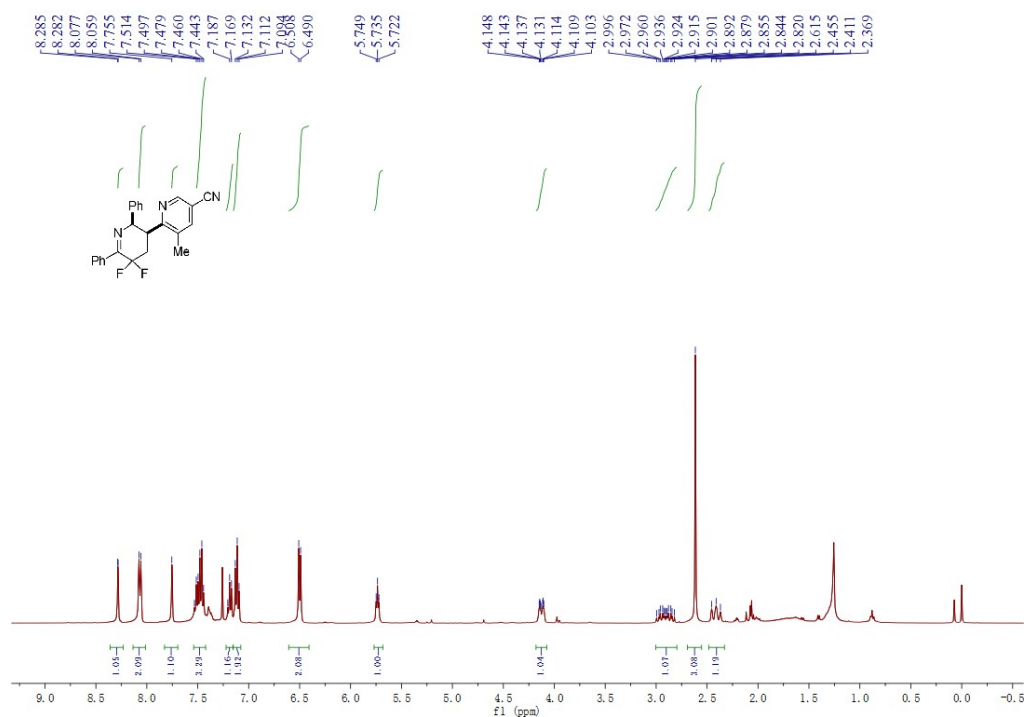

[<sup>13</sup>C\_NMR\_100 MHz\_(CDCl<sub>3</sub>: 77.00 ppm)]

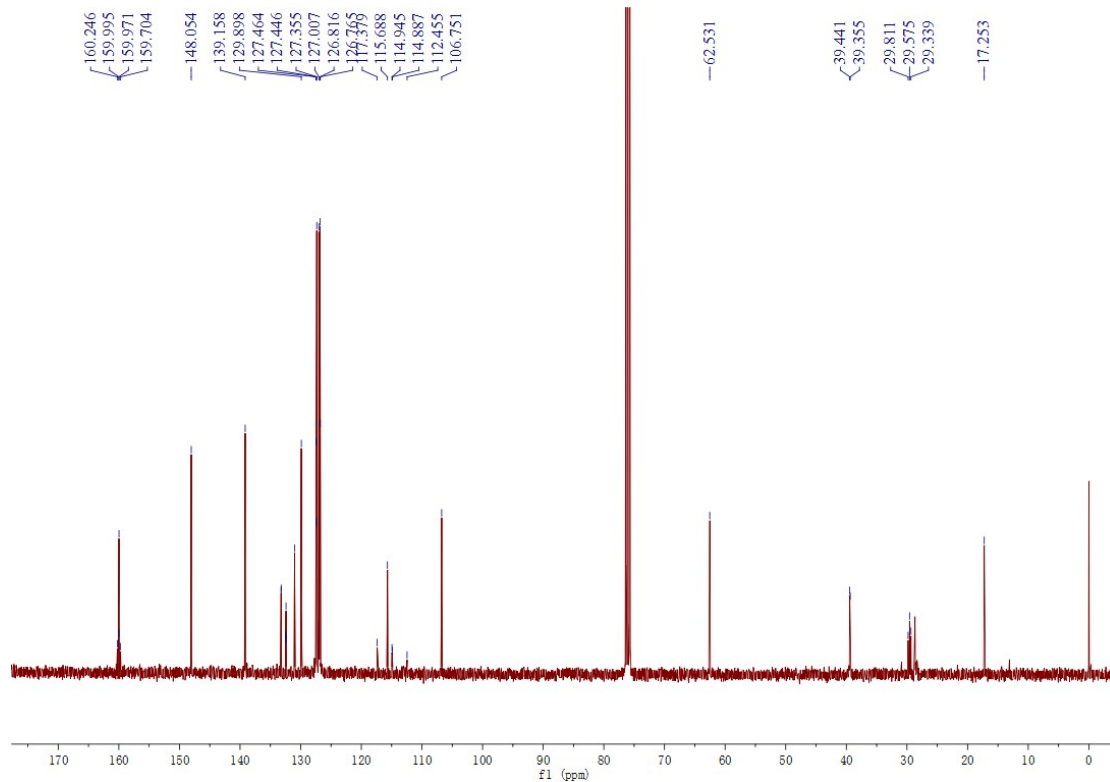

[<sup>19</sup>F\_NMR\_375 MHz]

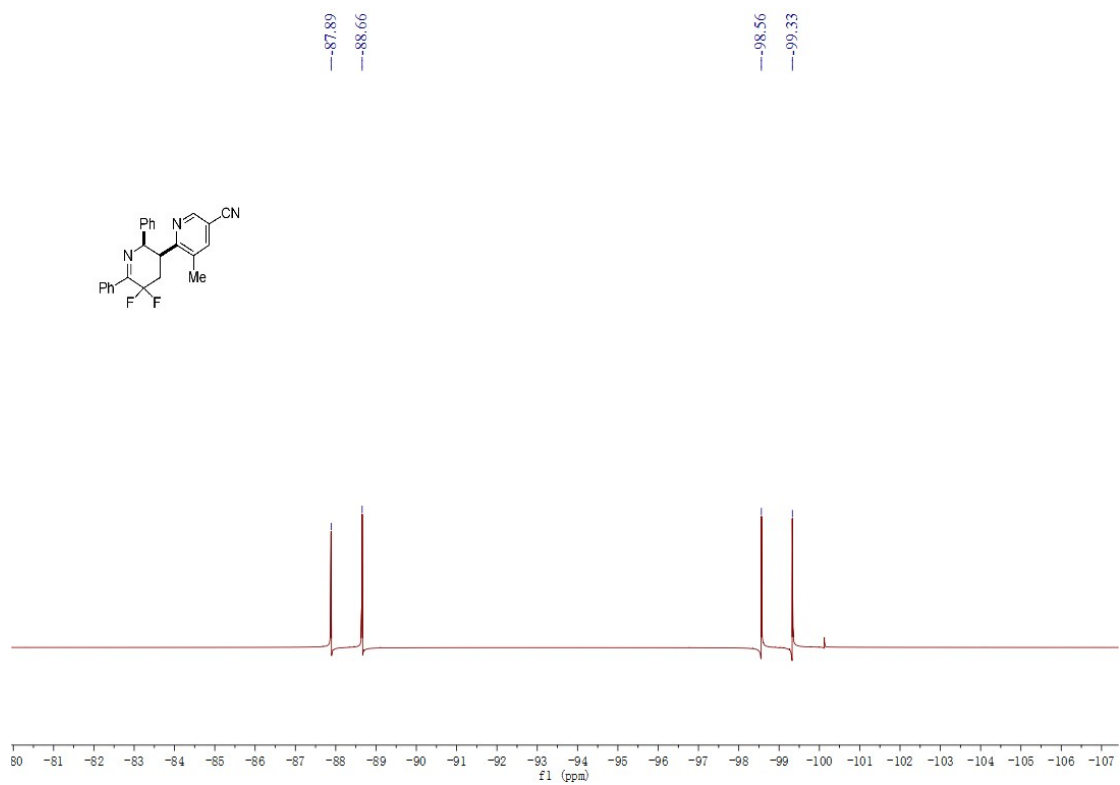

**5-Bromo-5',5'-difluoro-3-methyl-2',6'-diphenyl-2',3',4',5'-tetrahydro-2,3'-**

### bipyridine (3i)

[<sup>1</sup>H\_NMR\_400 MHz\_(CDCl<sub>3</sub>: 7.26 ppm)]

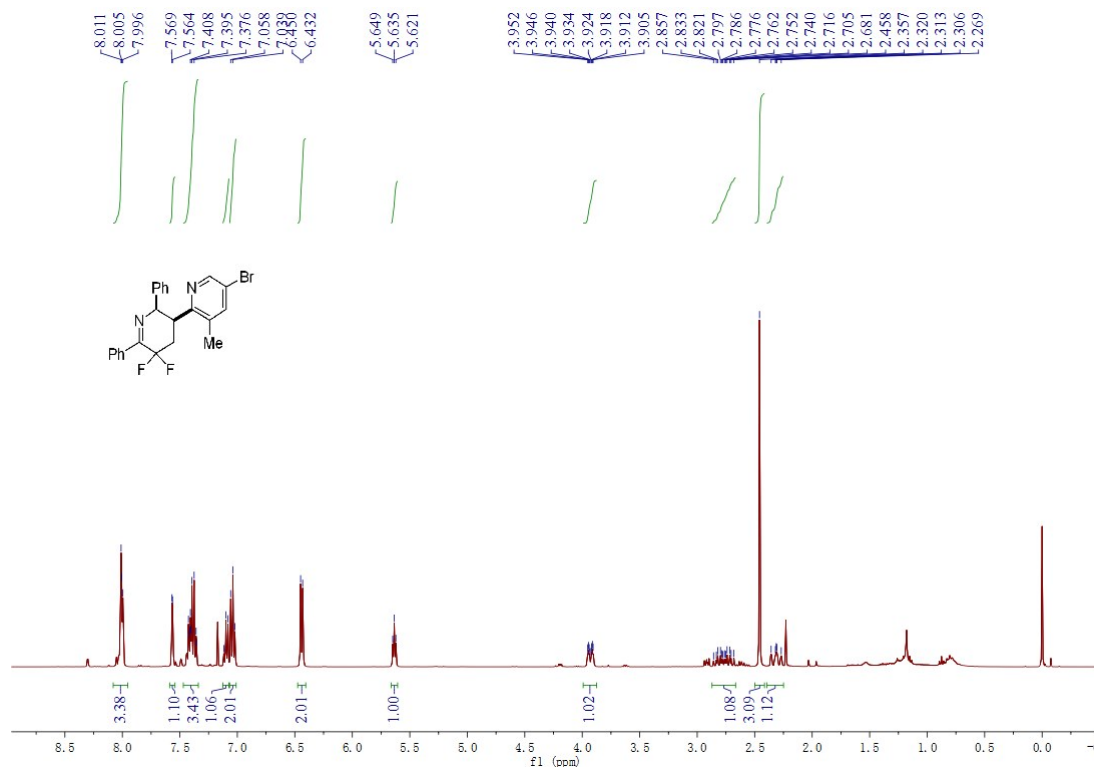

[<sup>13</sup>C\_NMR\_100 MHz\_(CDCl<sub>3</sub>: 77.00 ppm)]

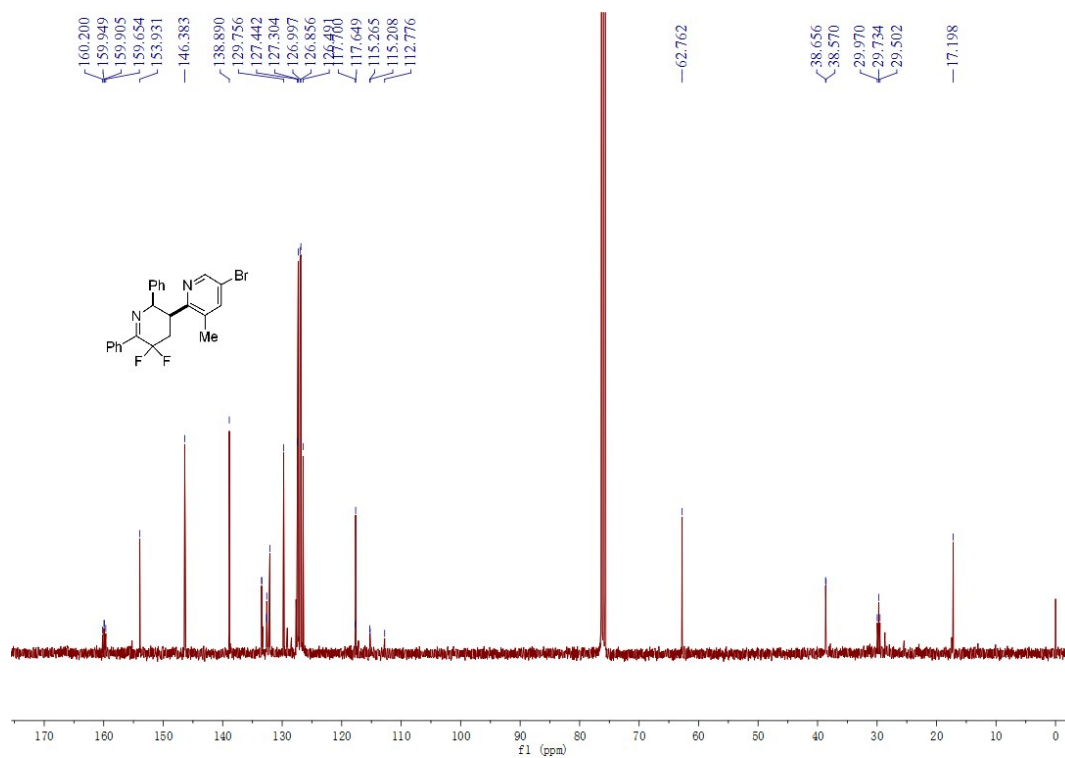

[<sup>19</sup>F\_NMR\_375 MHz]

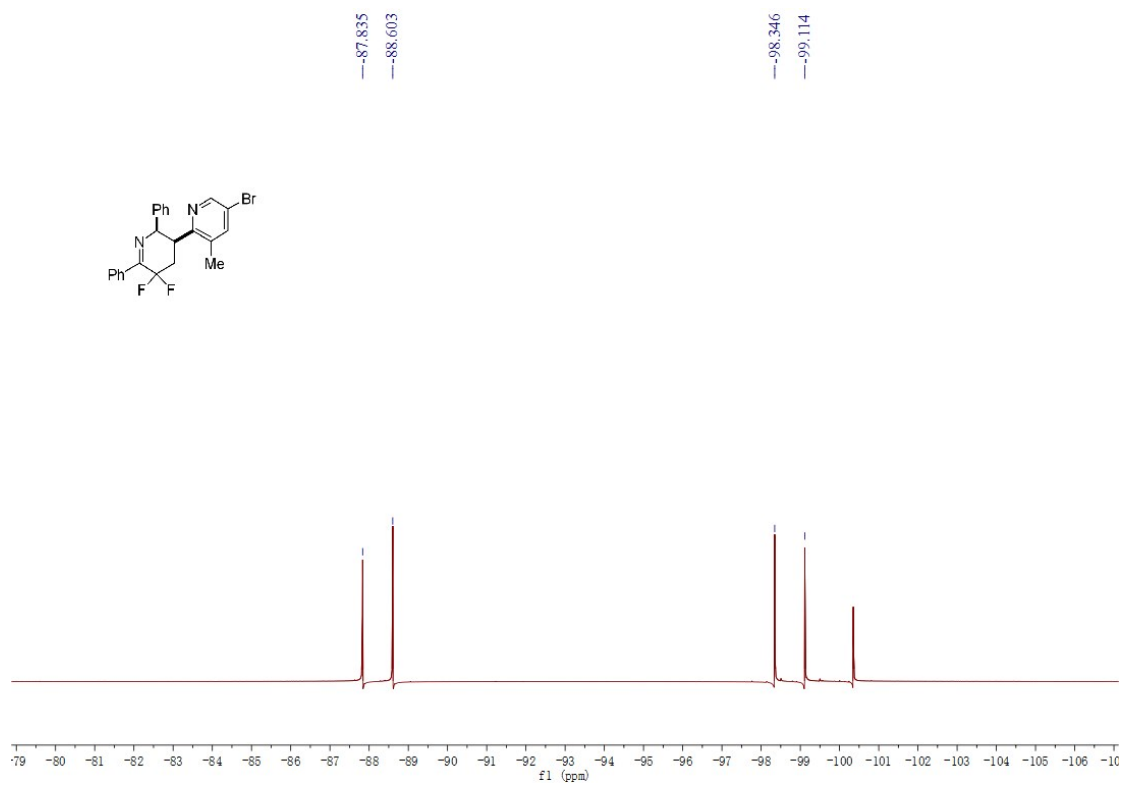

**2-(5,5-Difluoro-2,6-diphenyl-2,3,4,5-tetrahydropyridin-3-yl)quinoline (3j)**



[<sup>1</sup>H\_NMR\_400 MHz\_(CDCl<sub>3</sub>: 7.26 ppm)]

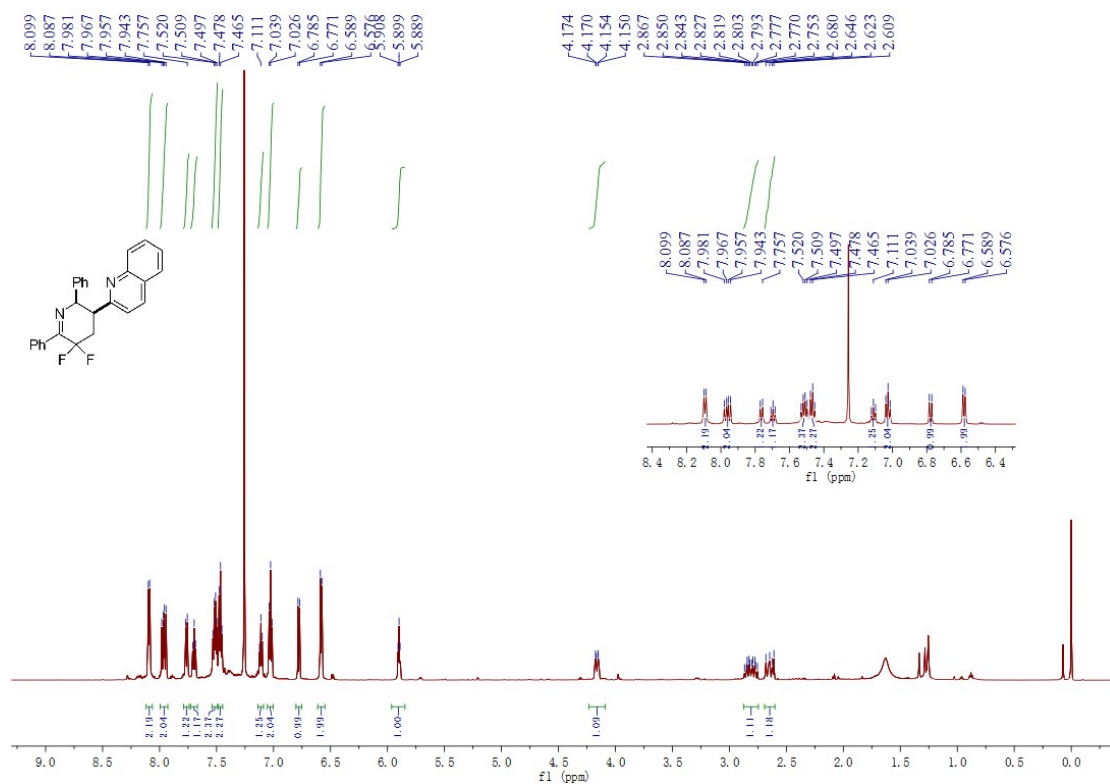

[<sup>13</sup>C\_NMR\_100 MHz\_(CDCl<sub>3</sub>: 77.00 ppm)]

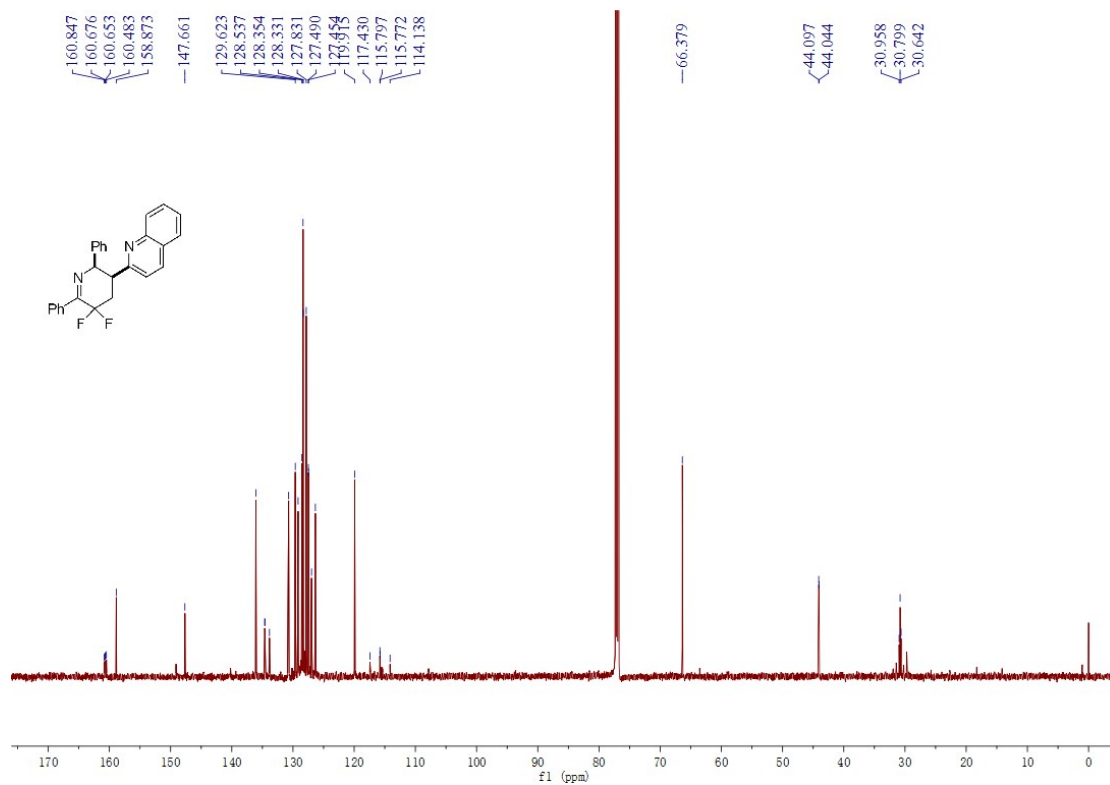

[<sup>19</sup>F\_NMR\_375 MHz]

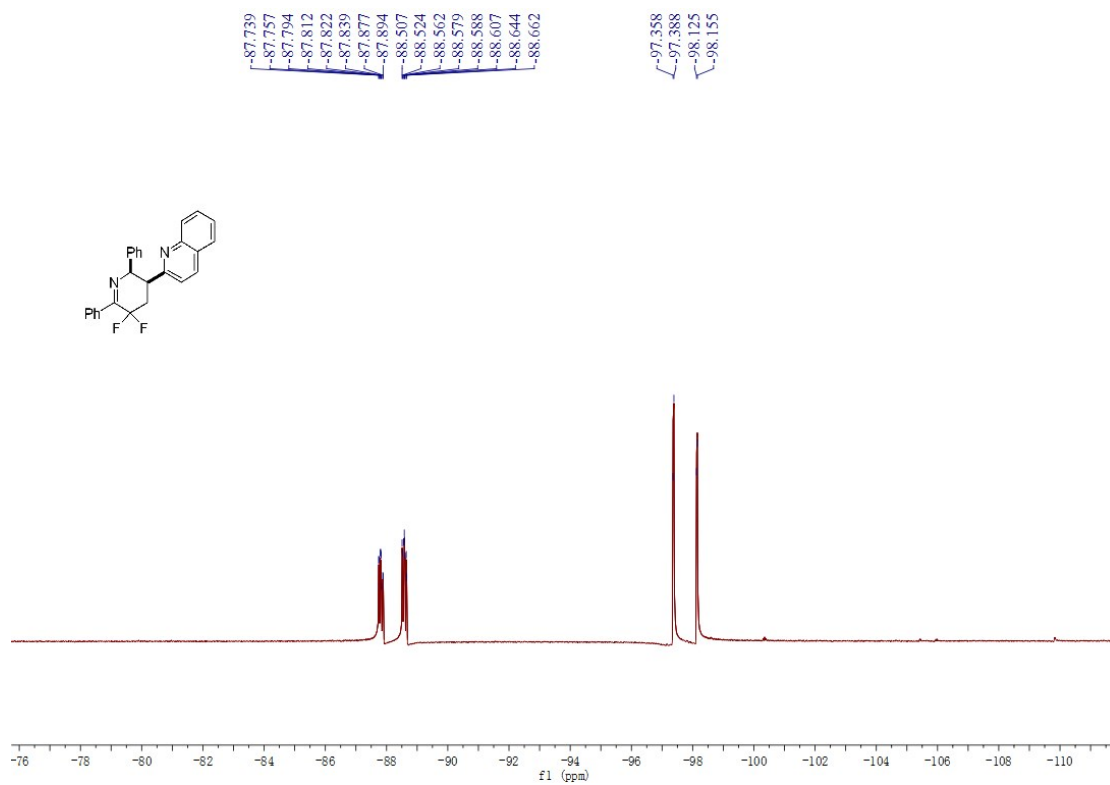

**6-Chloro-2-(5,5-difluoro-2,6-diphenyl-2,3,4,5-tetrahydropyridin-3-yl)quinoline**

**(3k)**

[<sup>1</sup>H\_NMR\_400 MHz\_(CDCl<sub>3</sub>: 7.26 ppm)]

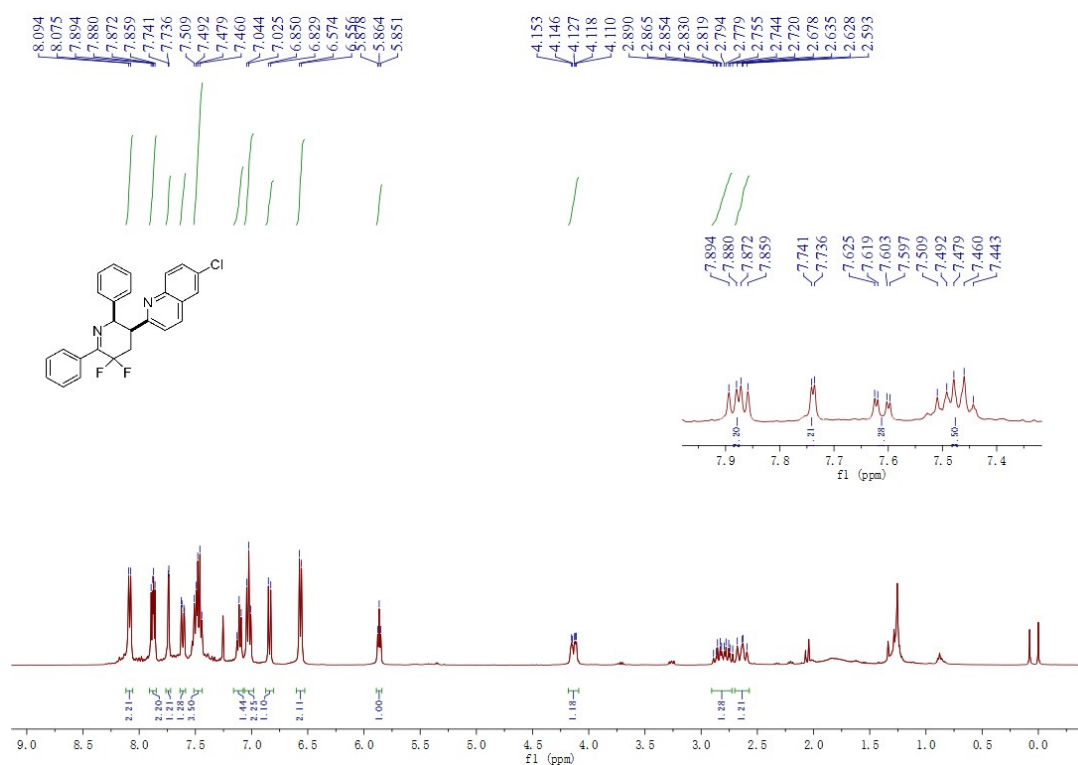

[<sup>13</sup>C\_NMR\_100 MHz\_(CDCl<sub>3</sub>: 77.00 ppm)]

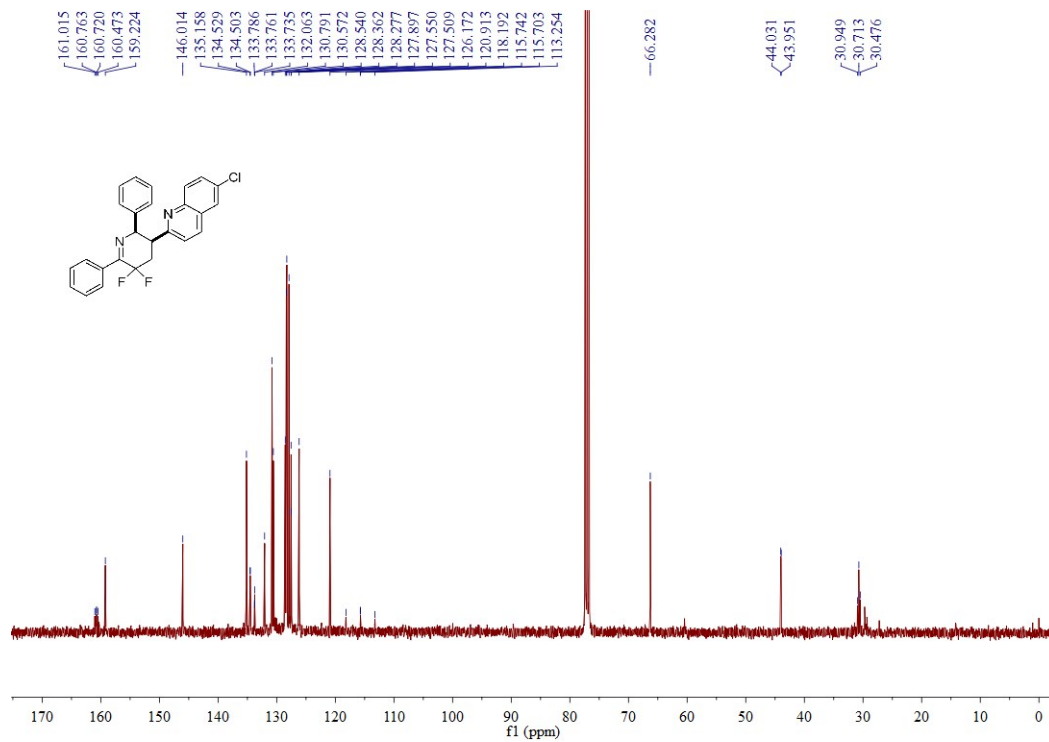

[<sup>19</sup>F\_NMR\_375 MHz]

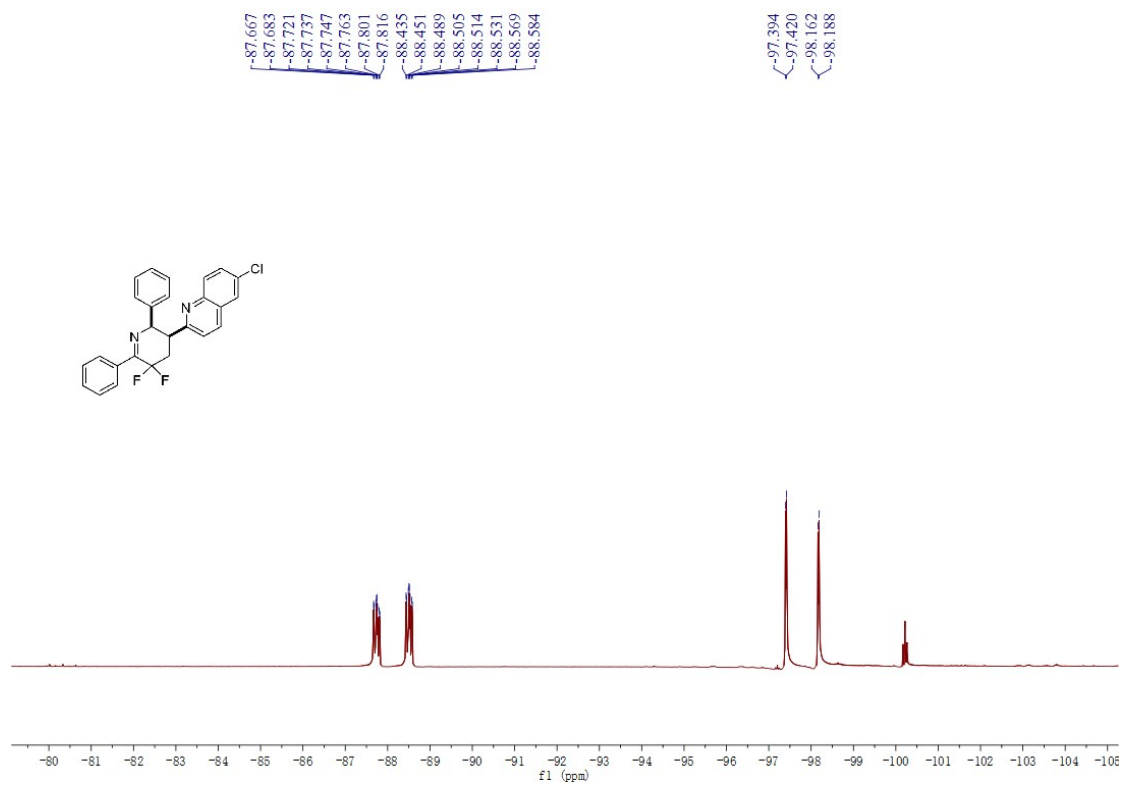

**2-(5,5-Difluoro-2,6-diphenyl-2,3,4,5-tetrahydropyridin-3-yl)-6-methylquinoline**

(31)

[<sup>1</sup>H\_NMR\_400 MHz\_(CDCl<sub>3</sub>: 7.26 ppm)]

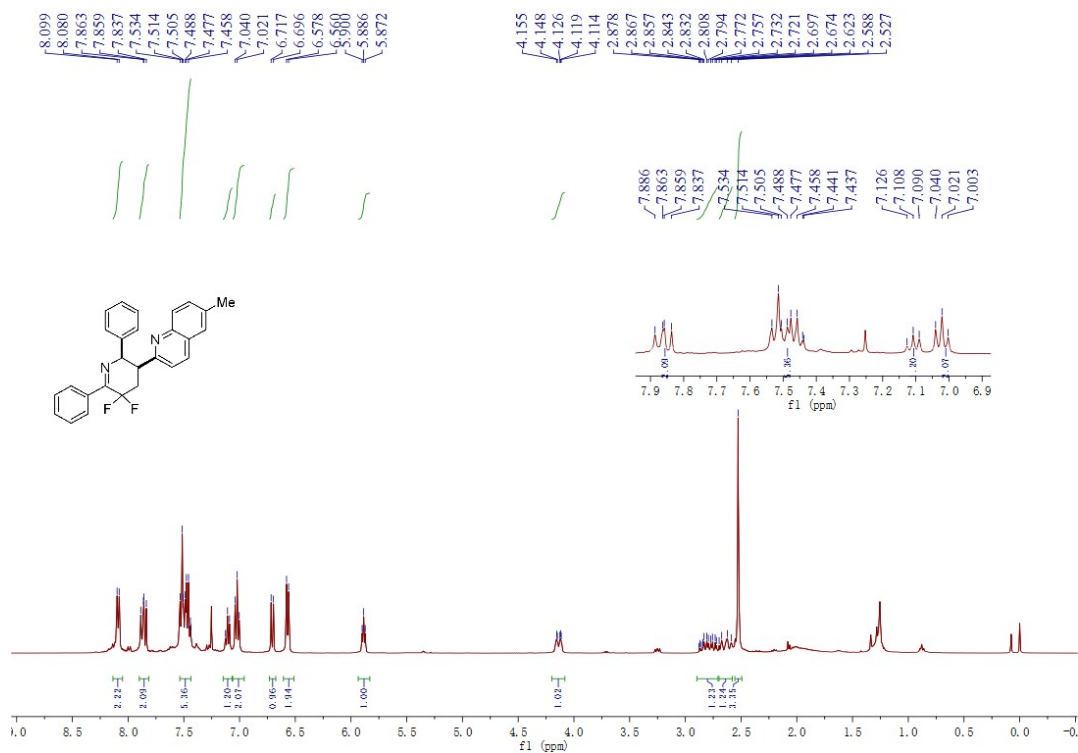

[<sup>13</sup>C\_NMR\_100 MHz\_(CDCl<sub>3</sub>: 77.00 ppm)]

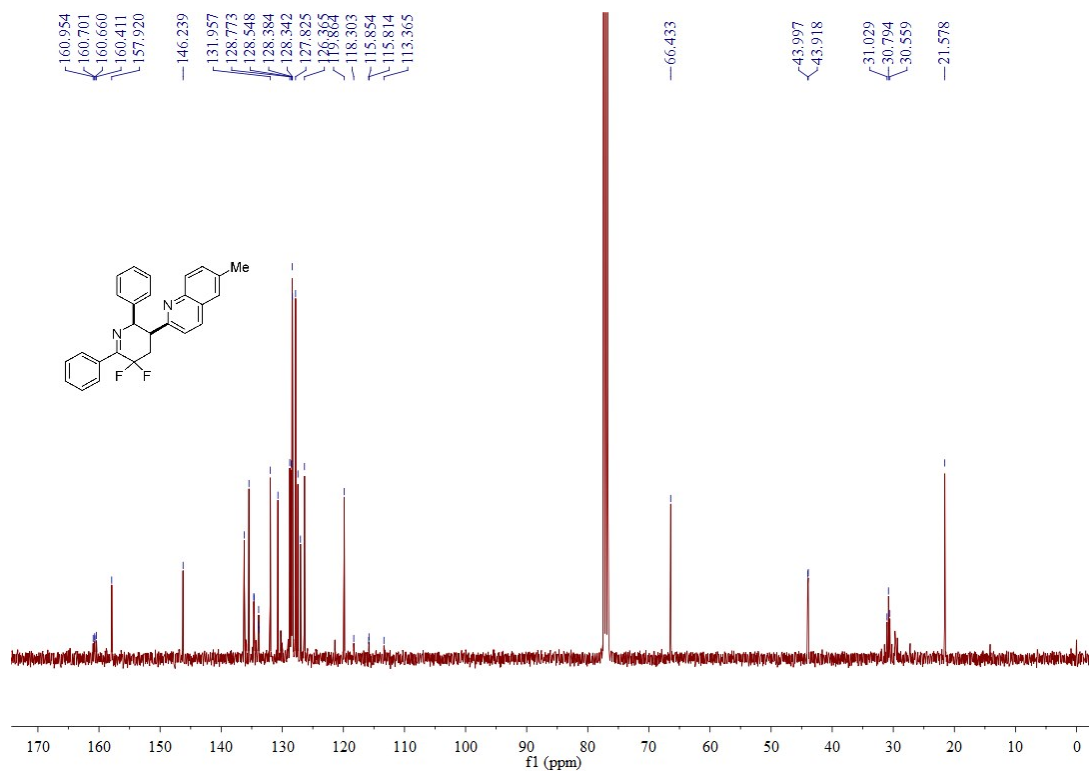

[<sup>19</sup>F\_NMR\_375 MHz]

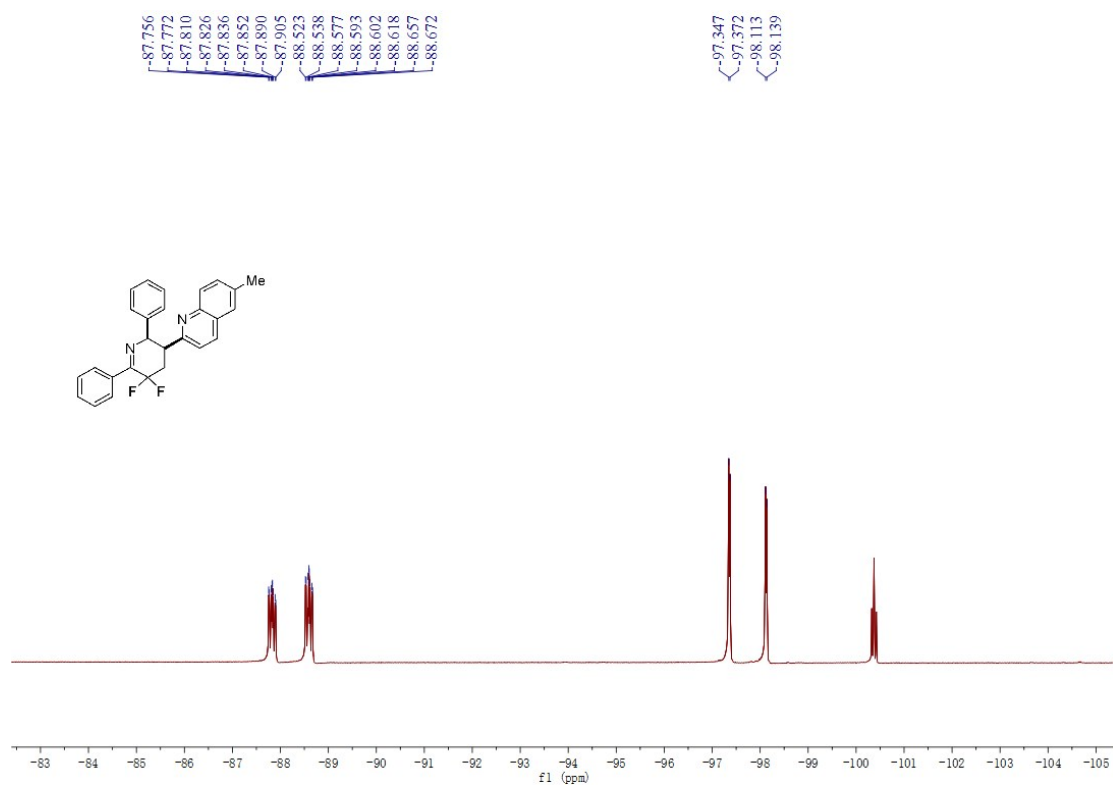

**2-(5,5-Difluoro-2,6-diphenyl-2,3,4,5-tetrahydropyridin-3-yl)-6-methoxyquinoline**

**(3m)**

[<sup>1</sup>H\_NMR\_400 MHz\_(CDCl<sub>3</sub>: 7.26 ppm)]

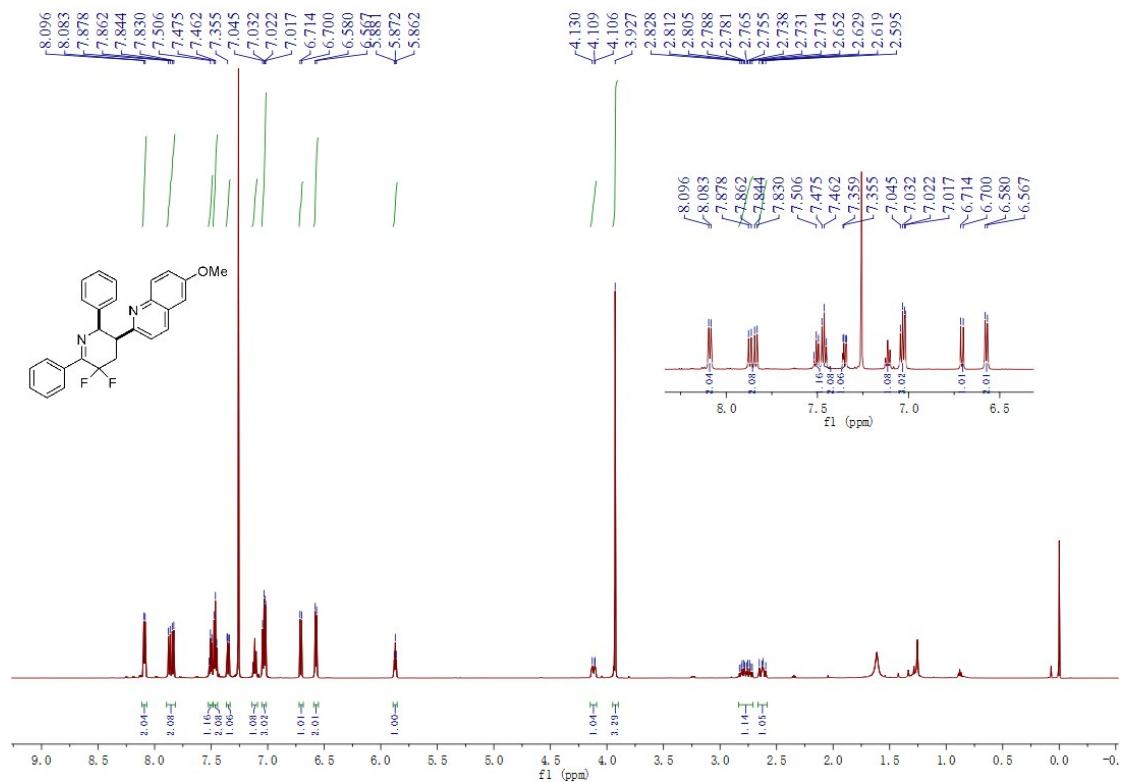

[<sup>13</sup>C\_NMR\_100 MHz\_(CDCl<sub>3</sub>: 77.00 ppm)]

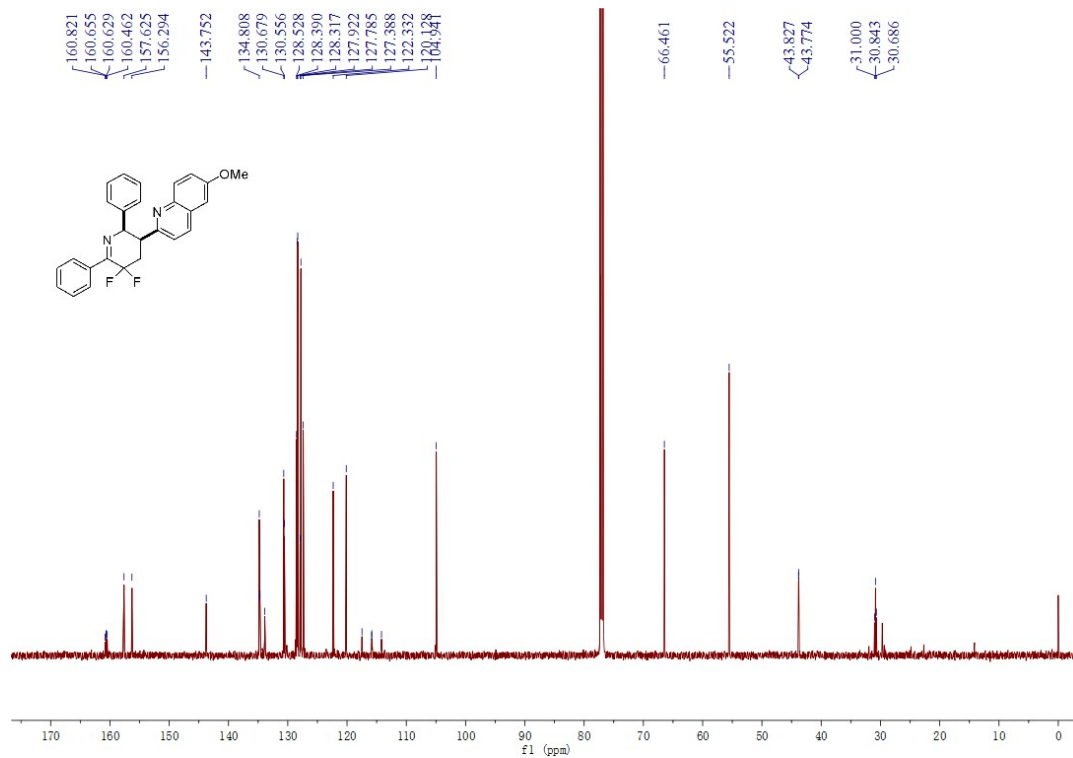

[<sup>19</sup>F\_NMR\_375 MHz]

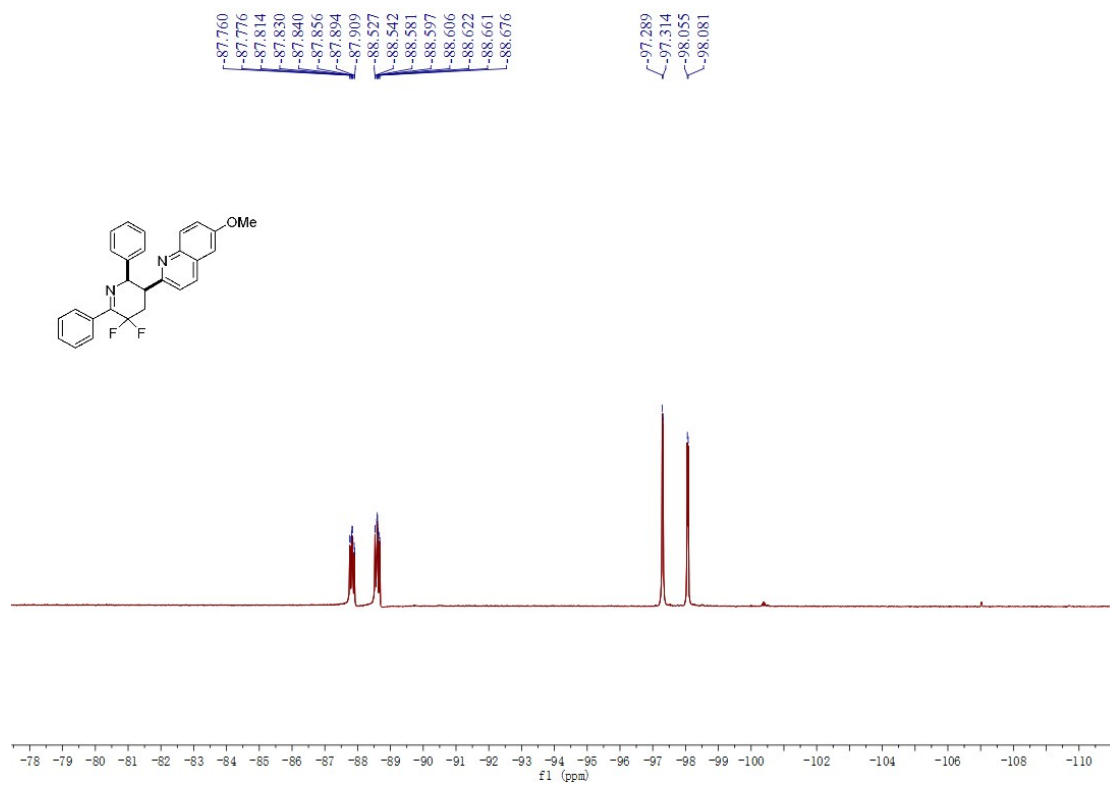

**2-(5,5-Difluoro-2,6-diphenyl-2,3,4,5-tetrahydropyridin-3-yl)-4-methylquinoline**



**(3n)** $[^1\text{H\_NMR\_400 MHz\_}(\text{CDCl}_3: 7.26 \text{ ppm})]$ 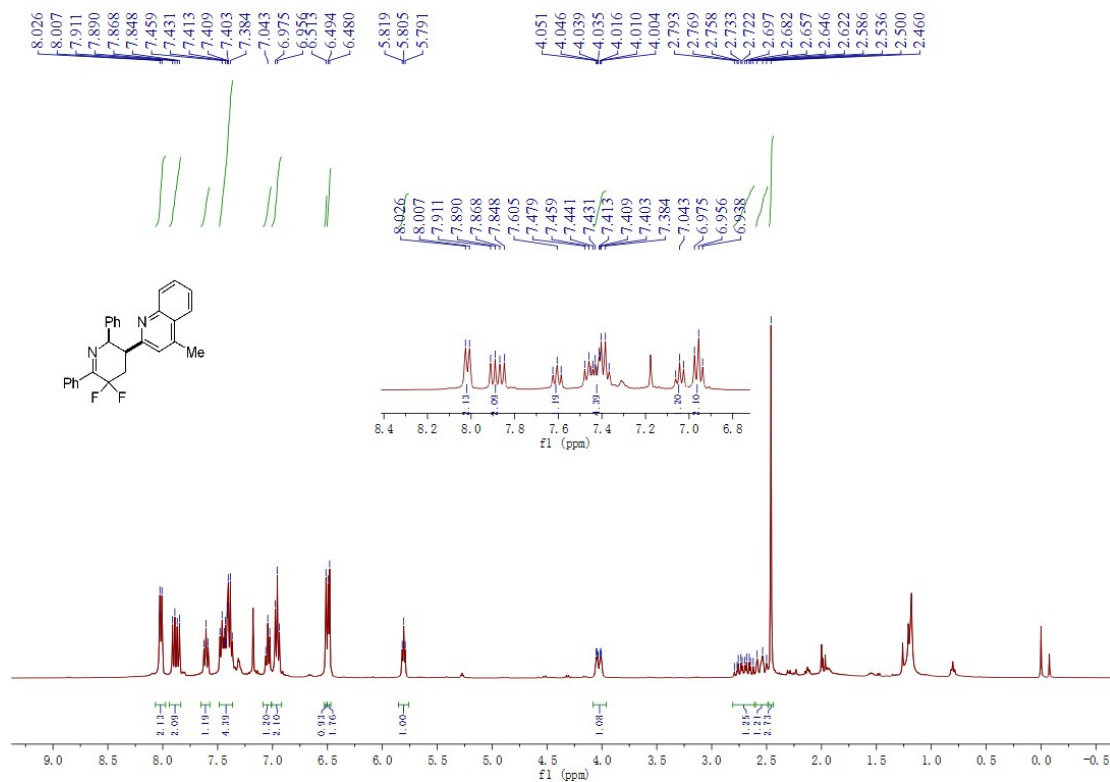 $[^{13}\text{C\_NMR\_100 MHz\_}(\text{CDCl}_3: 77.00 \text{ ppm})]$ 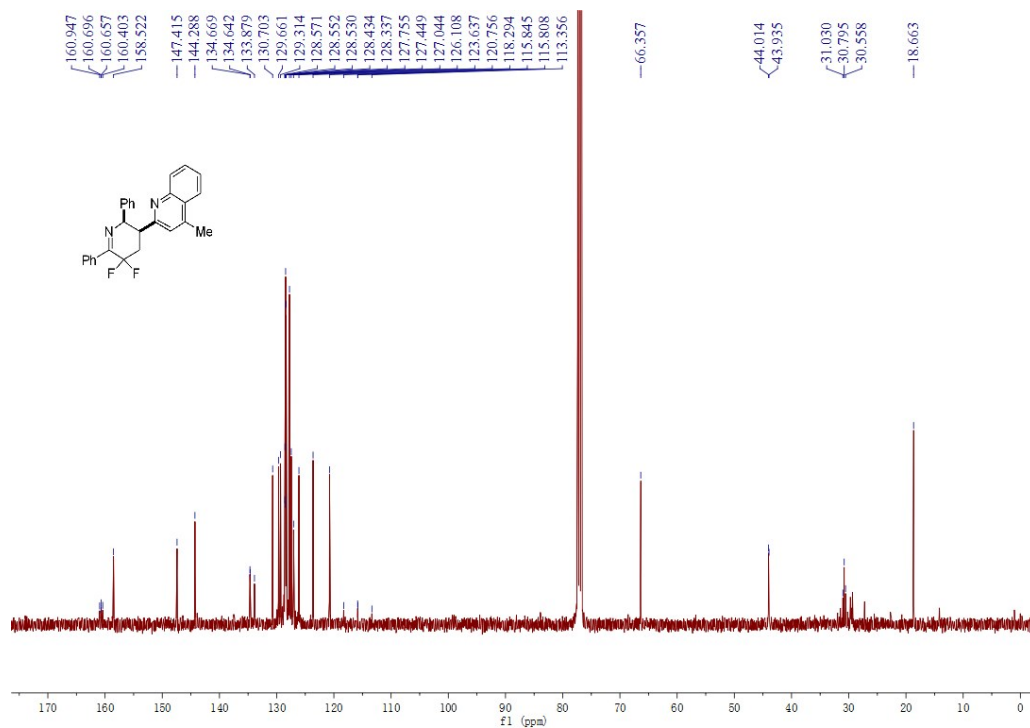 $[^{19}\text{F\_NMR\_375 MHz}]$

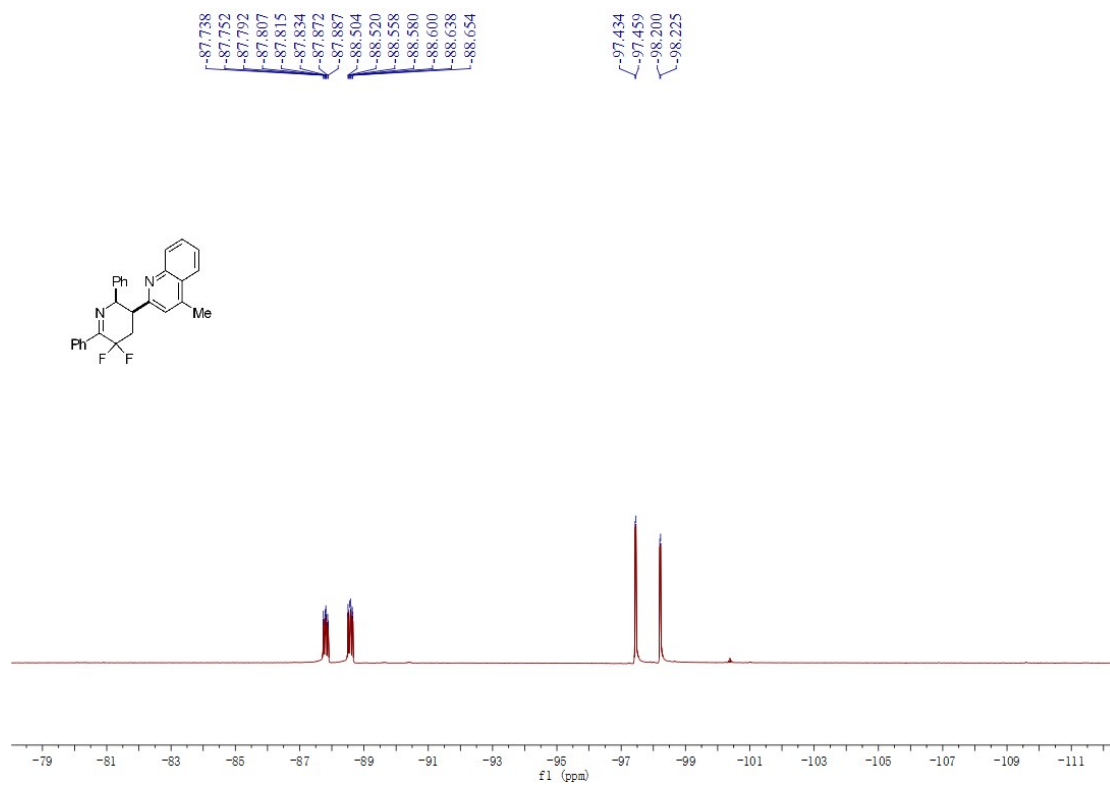

**5-Bromo-2-(5,5-difluoro-2,6-diphenyl-2,3,4,5-tetrahydropyridin-3-yl)quinoline**

(30)

[<sup>1</sup>H\_NMR\_400 MHz\_(CDCl<sub>3</sub>: 7.26 ppm)]

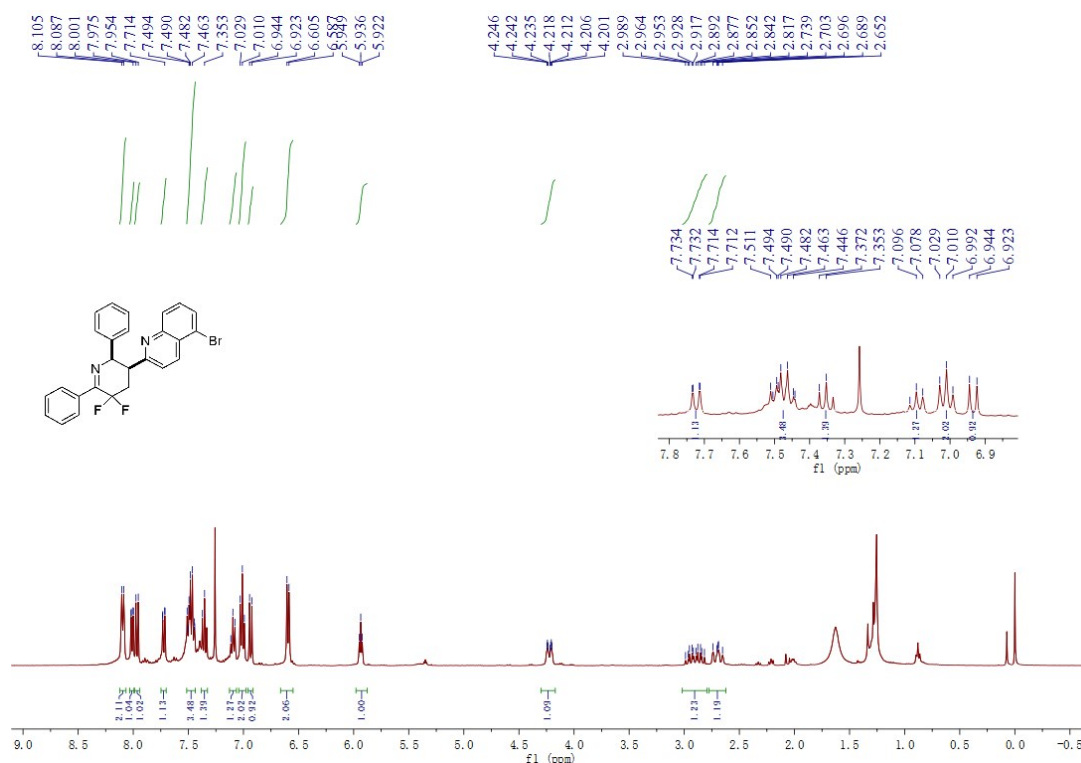

[<sup>13</sup>C\_NMR\_100 MHz\_(CDCl<sub>3</sub>: 77.00 ppm)]

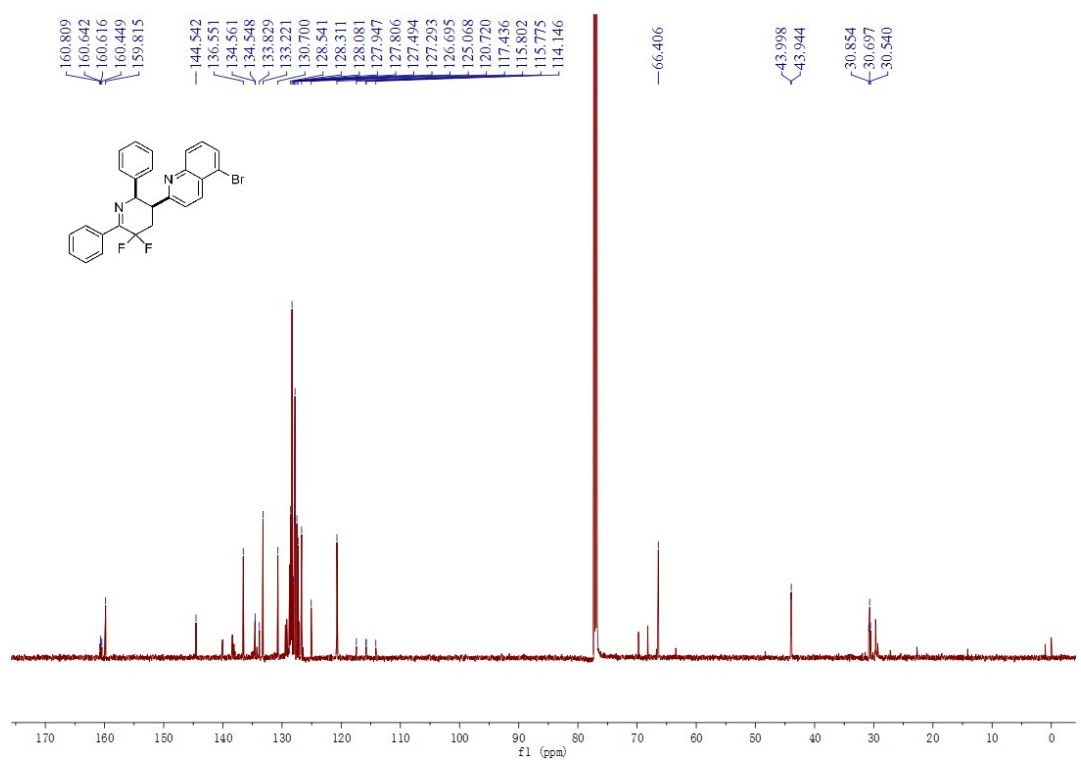

[<sup>19</sup>F\_NMR\_375 MHz]

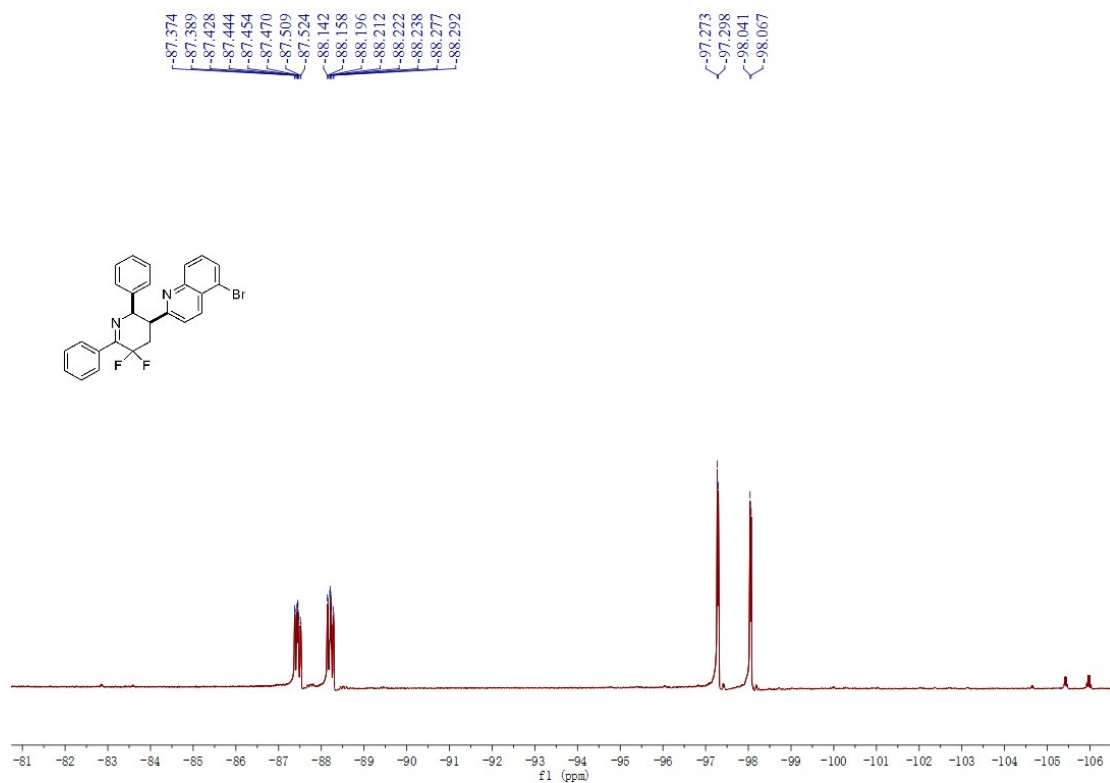

**5',5'-Difluoro-3-methyl-2'-phenyl-6'-(p-tolyl)-2',3',4',5'-tetrahydro-[2,3'-]**

### bipyridine]-5-carbonitrile (3p)

[<sup>1</sup>H\_NMR\_400 MHz\_(CDCl<sub>3</sub>: 7.26 ppm)]

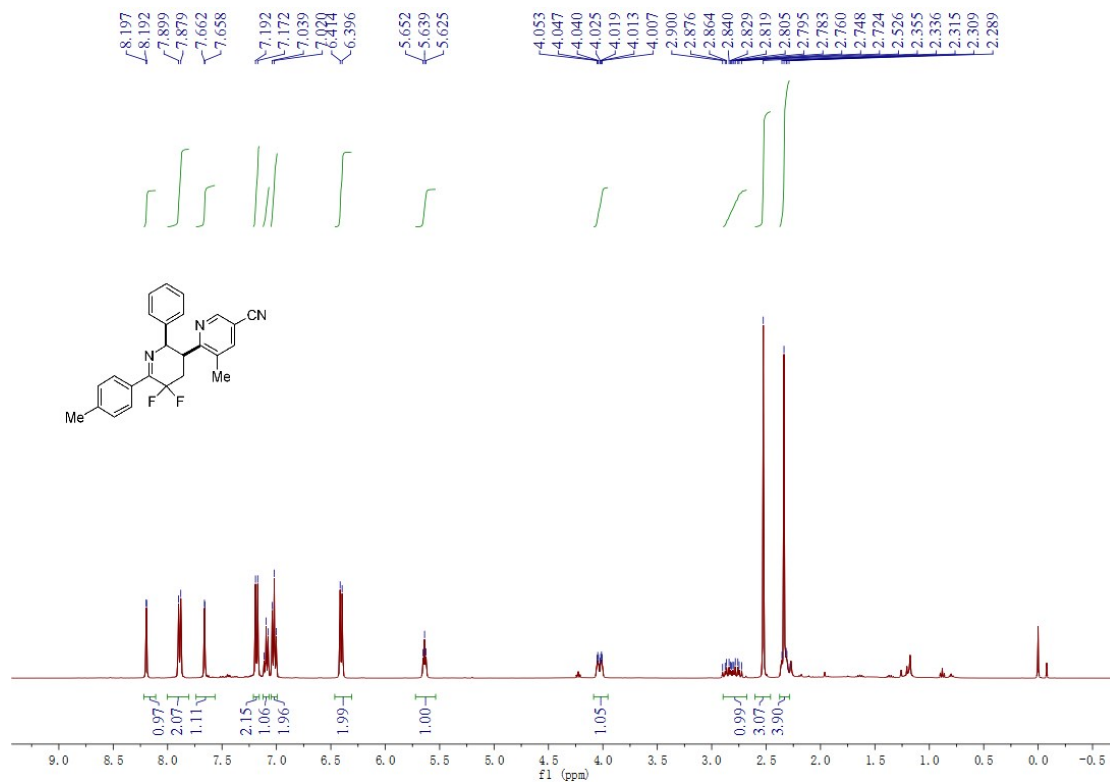

[<sup>13</sup>C\_NMR\_100 MHz\_(CDCl<sub>3</sub>: 77.00 ppm)]

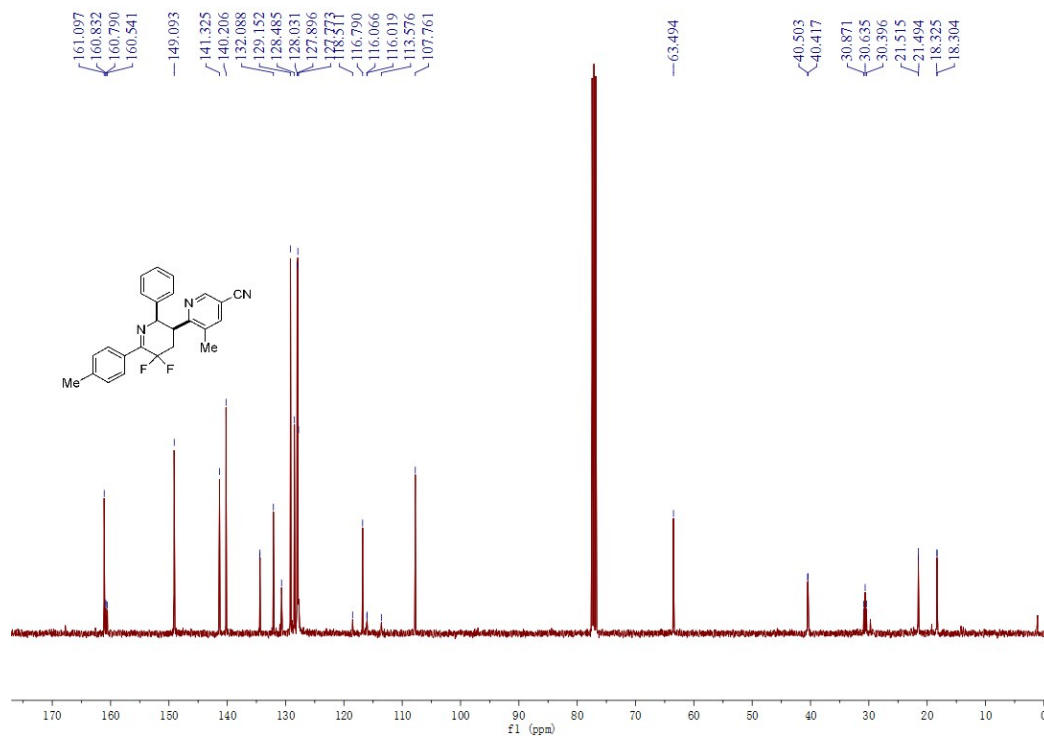

[<sup>19</sup>F\_NMR\_375 MHz]

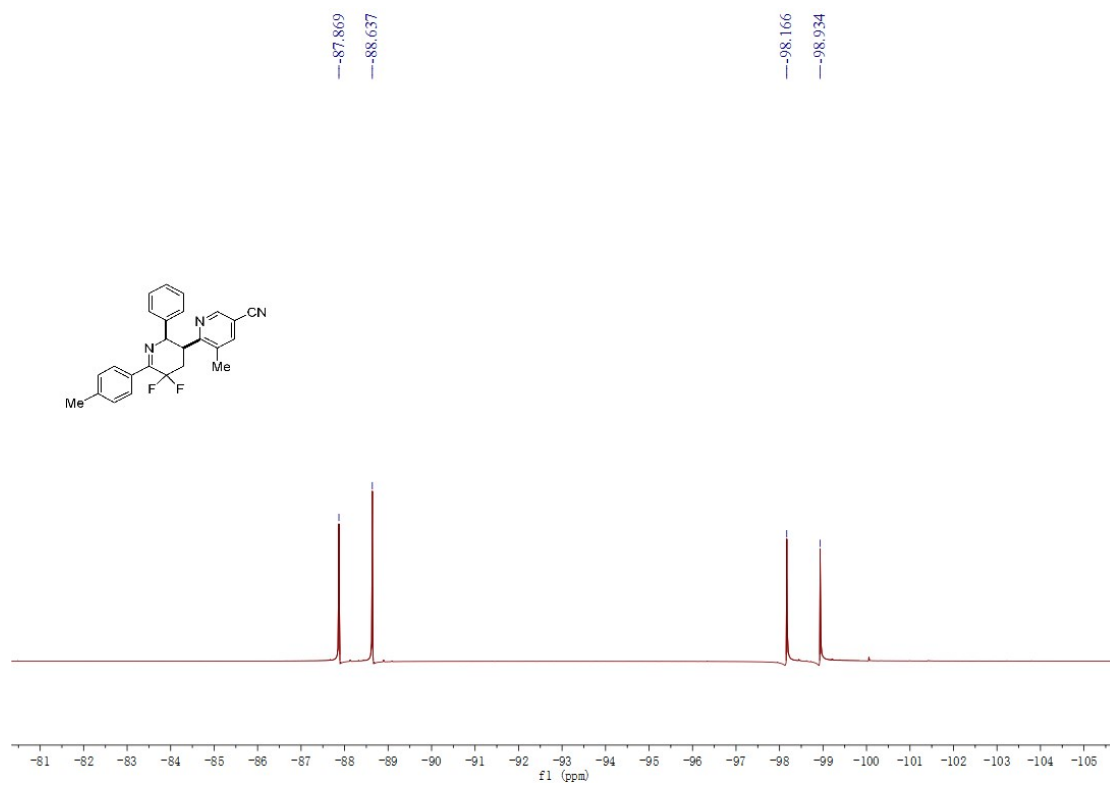

5',5'-Difluoro-6'-(4-methoxyphenyl)-3-methyl-2'-phenyl-2',3',4',5'-tetrahydro-

### [2,3'-bipyridine]-5-carbonitrile (3q)

[<sup>1</sup>H\_NMR\_400 MHz\_(CDCl<sub>3</sub>: 7.26 ppm)]

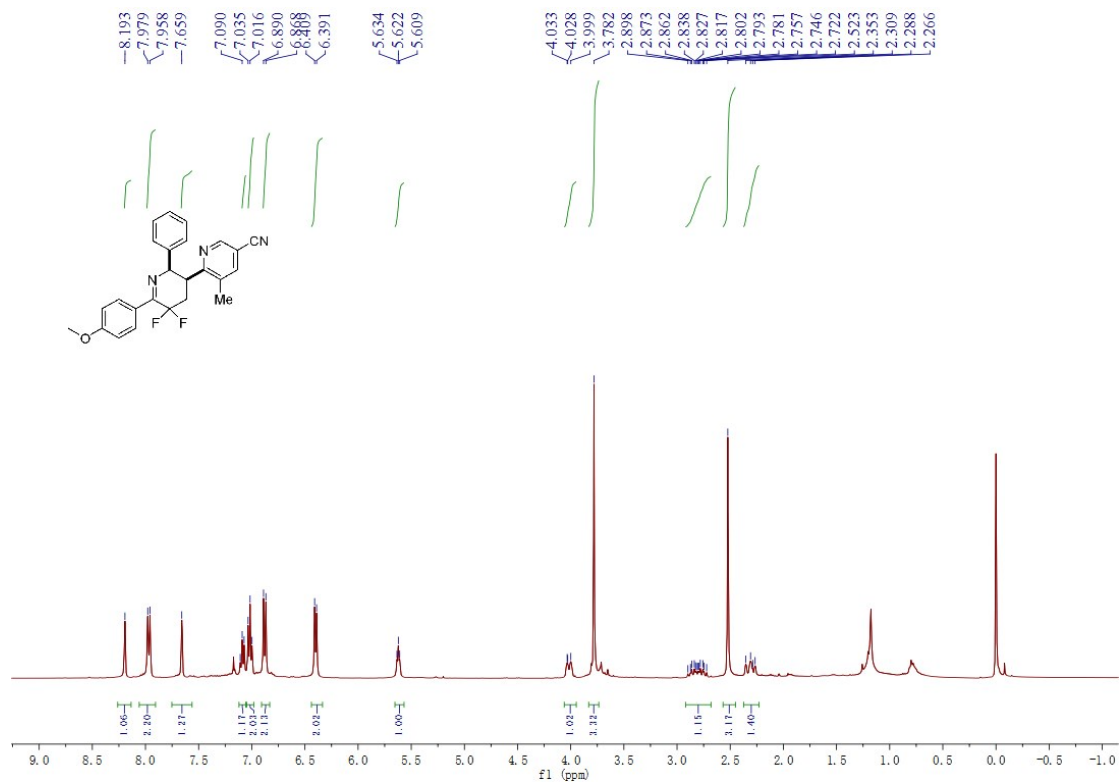

[<sup>13</sup>C\_NMR\_100 MHz\_(CDCl<sub>3</sub>: 77.00 ppm)]

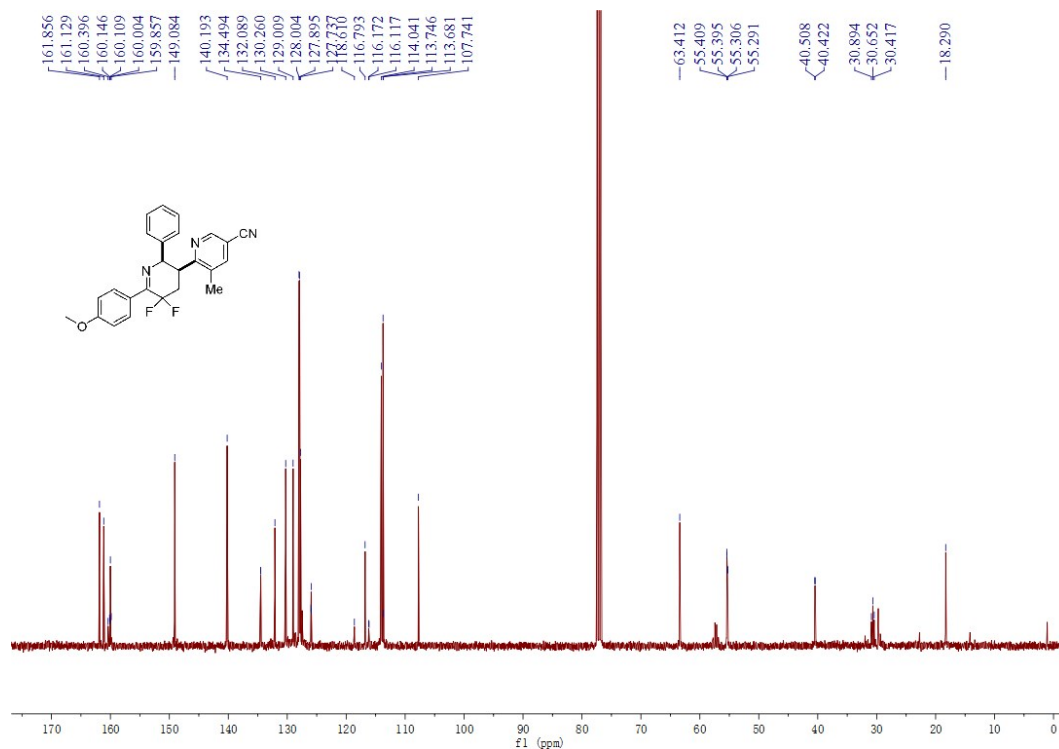

[<sup>19</sup>F\_NMR\_375 MHz]

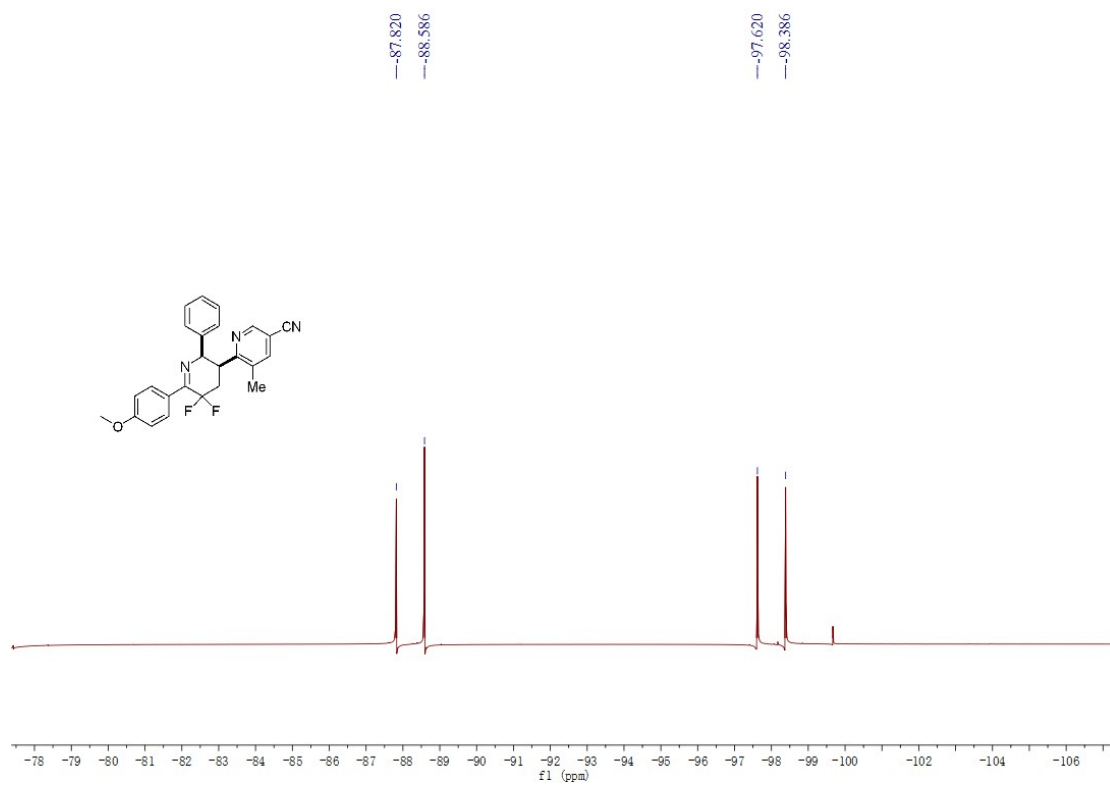

**5',5'-Difluoro-3-methyl-2'-phenyl-6'-(m-tolyl)-2,3,4,5'-tetrahydro-[2,3'-**



### bipyridine]-5-carbonitrile (3r)

[<sup>1</sup>H\_NMR\_400 MHz\_(CDCl<sub>3</sub>: 7.26 ppm)]

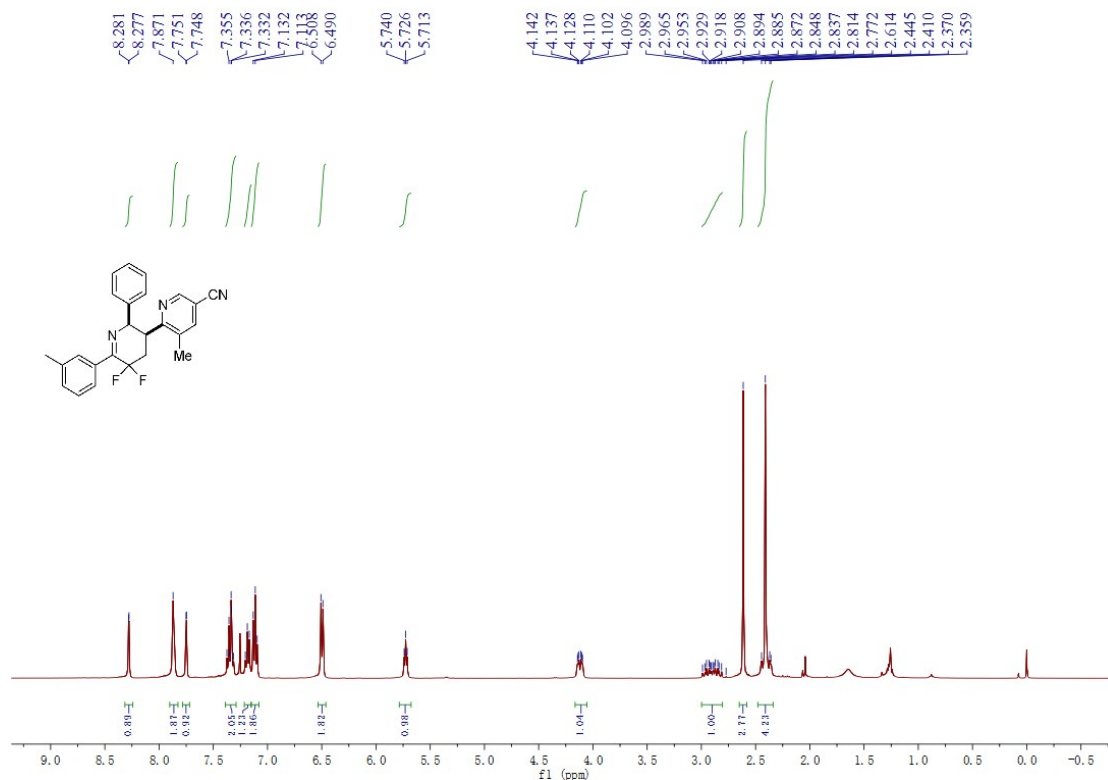

[<sup>13</sup>C\_NMR\_100 MHz\_(CDCl<sub>3</sub>: 77.00 ppm)]

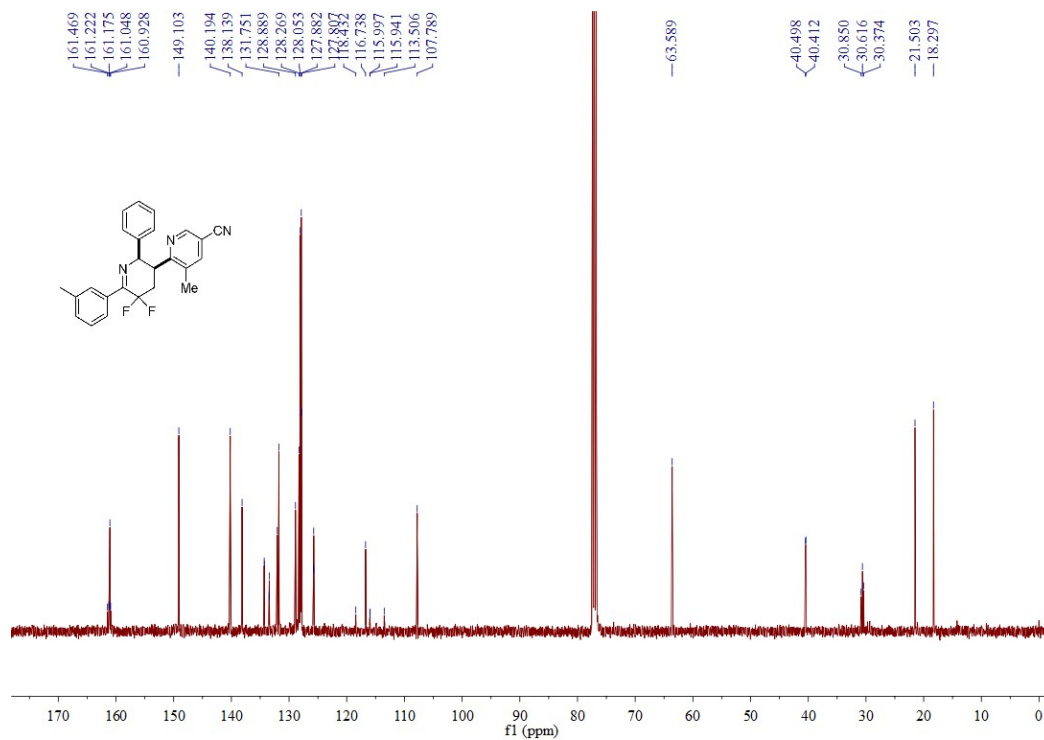

[<sup>19</sup>F\_NMR\_375 MHz]

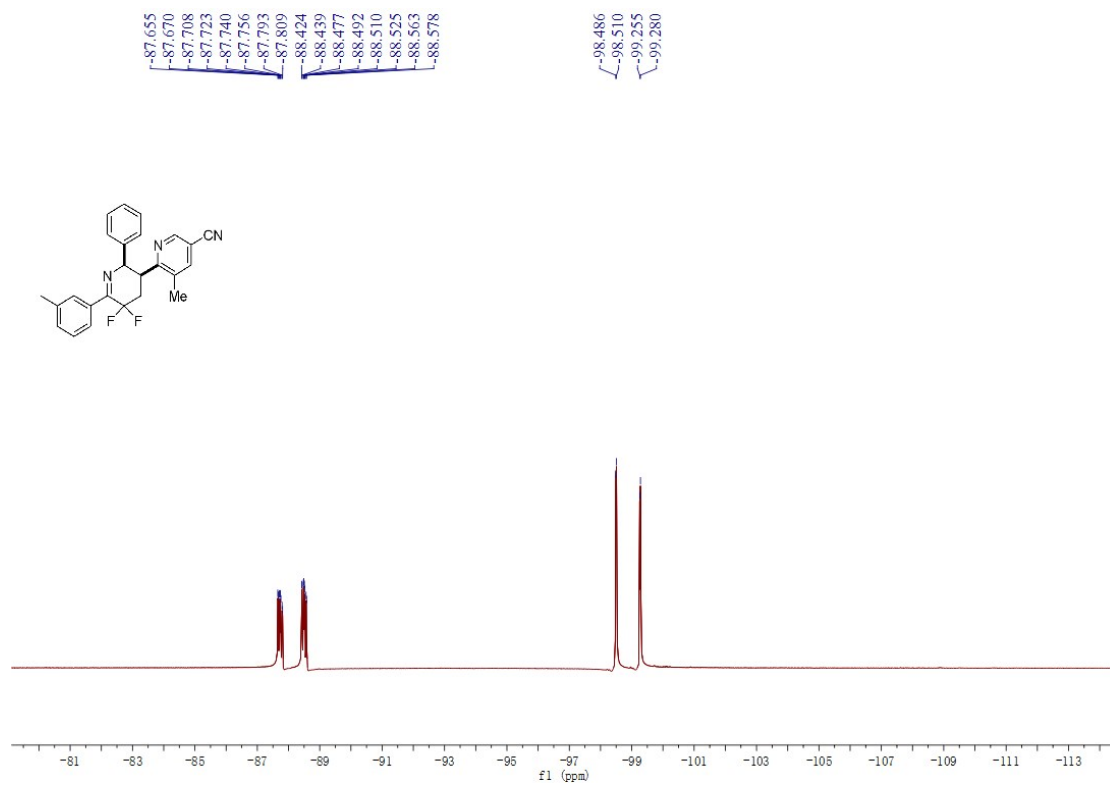

**5',5'-Difluoro-6'-(4-fluorophenyl)-3-methyl-2'-phenyl-2',3',4',5'-tetrahydro-[2,3'-]**

### bipyridine]-5-carbonitrile (3s)

[<sup>1</sup>H\_NMR\_400 MHz\_(CDCl<sub>3</sub>: 7.26 ppm)]

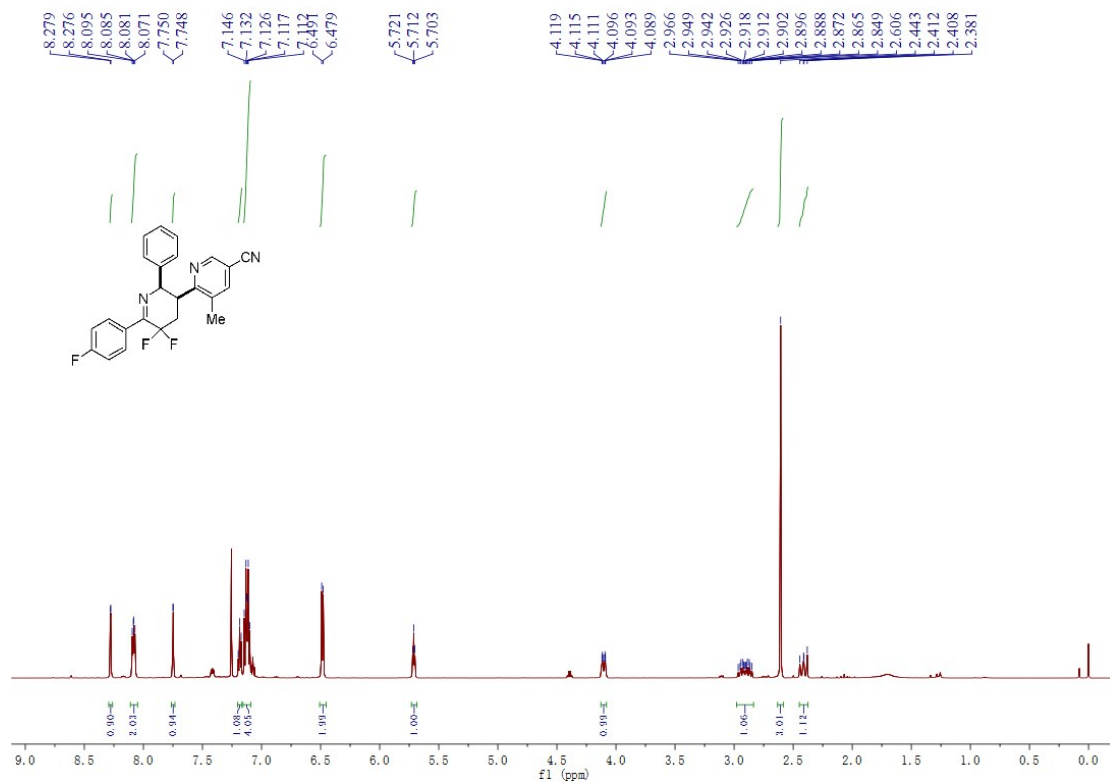

[<sup>13</sup>C\_NMR\_100 MHz\_(CDCl<sub>3</sub>: 77.00 ppm)]

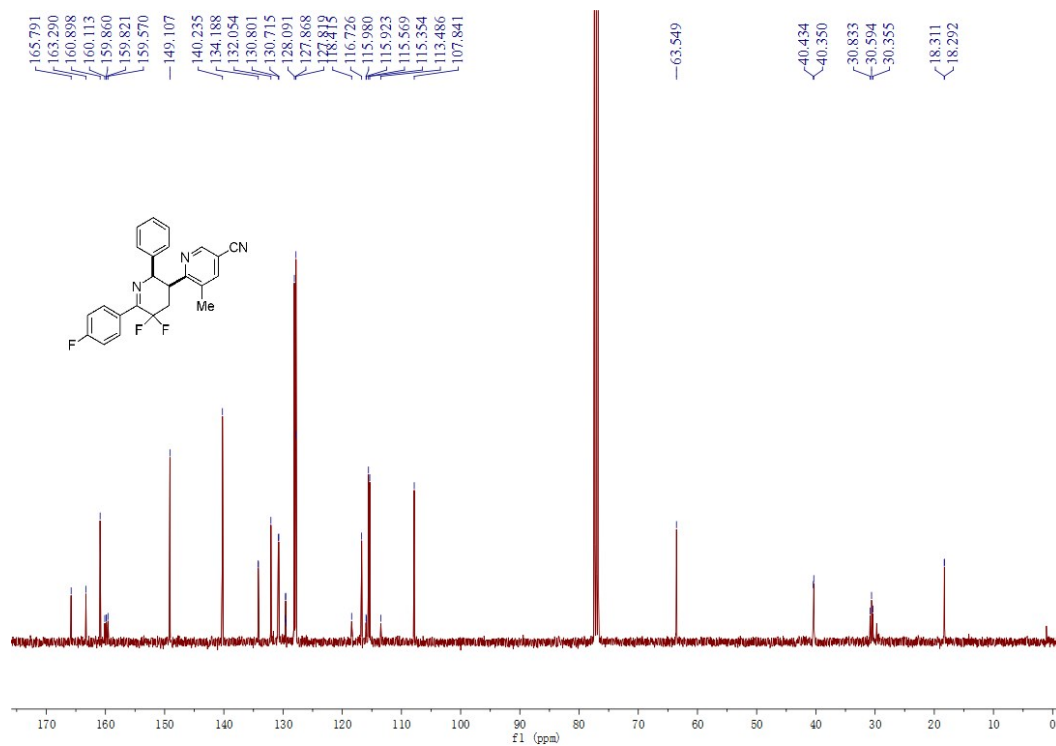

[<sup>19</sup>F\_NMR\_375 MHz]

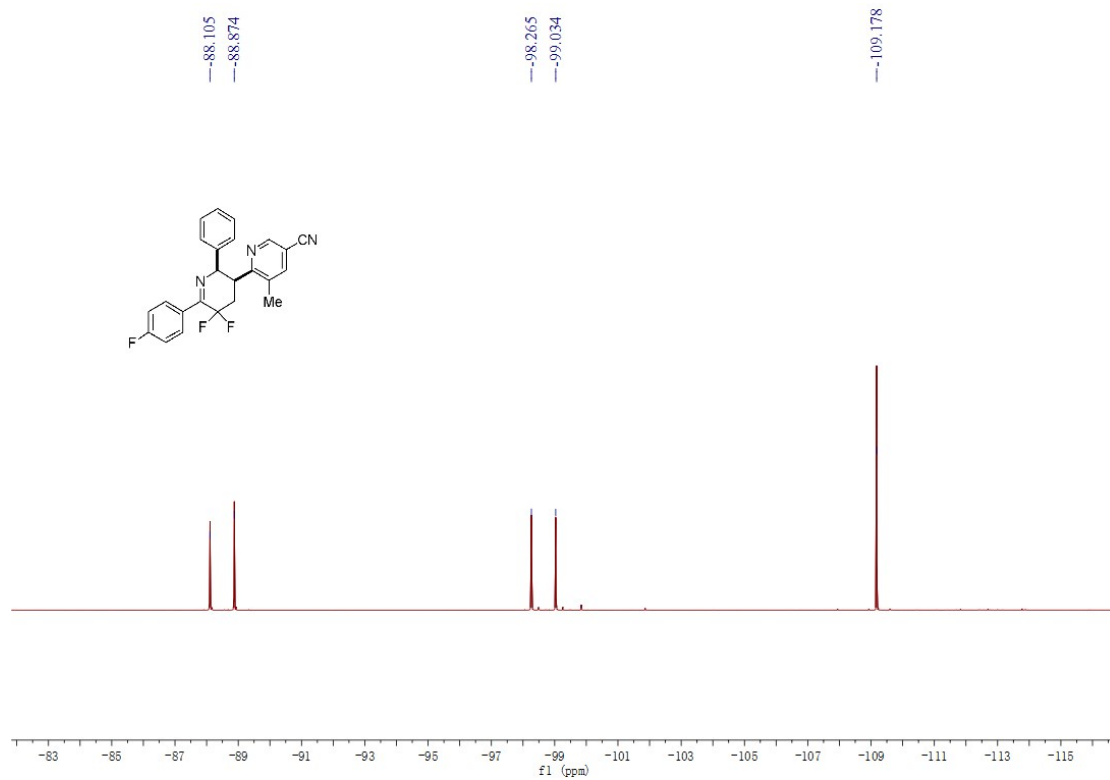

6'-(4-Bromophenyl)-5',5'-difluoro-3-methyl-2'-phenyl-2',3',4',5'-tetrahydro-[2,3'-]

### bipyridine]-5-carbonitrile (3t)

[<sup>1</sup>H\_NMR\_400 MHz\_(CDCl<sub>3</sub>: 7.26 ppm)]

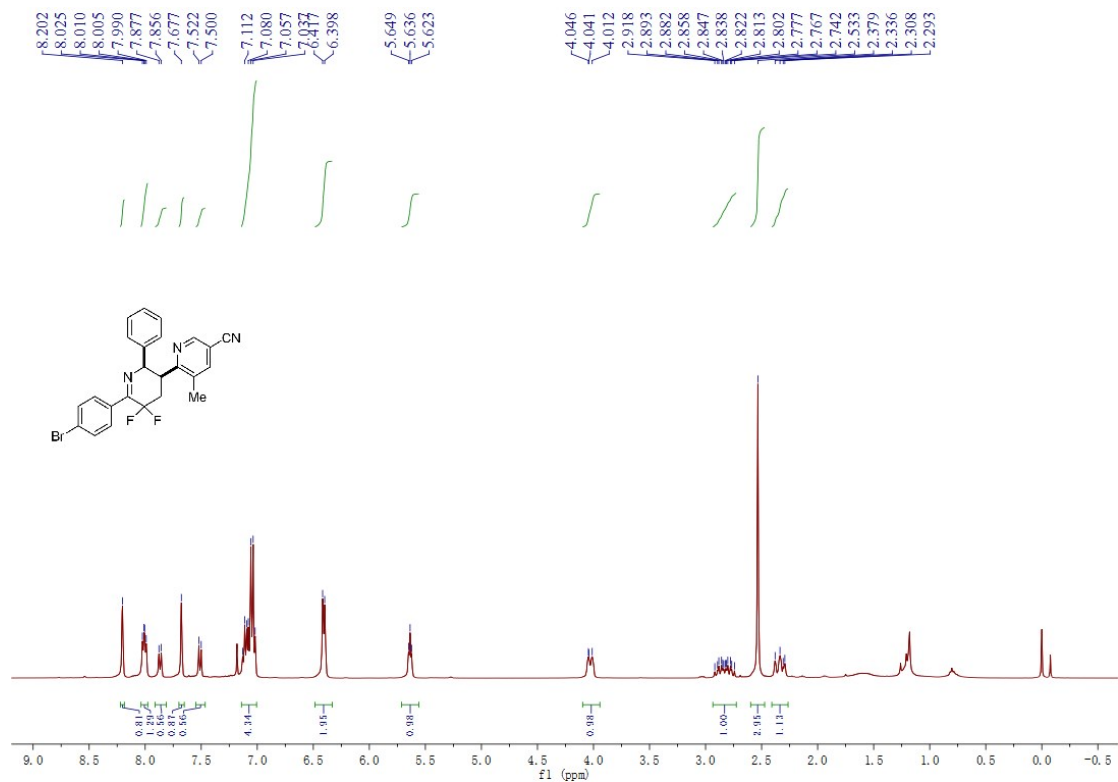

[<sup>13</sup>C\_NMR\_100 MHz\_(CDCl<sub>3</sub>: 77.00 ppm)]

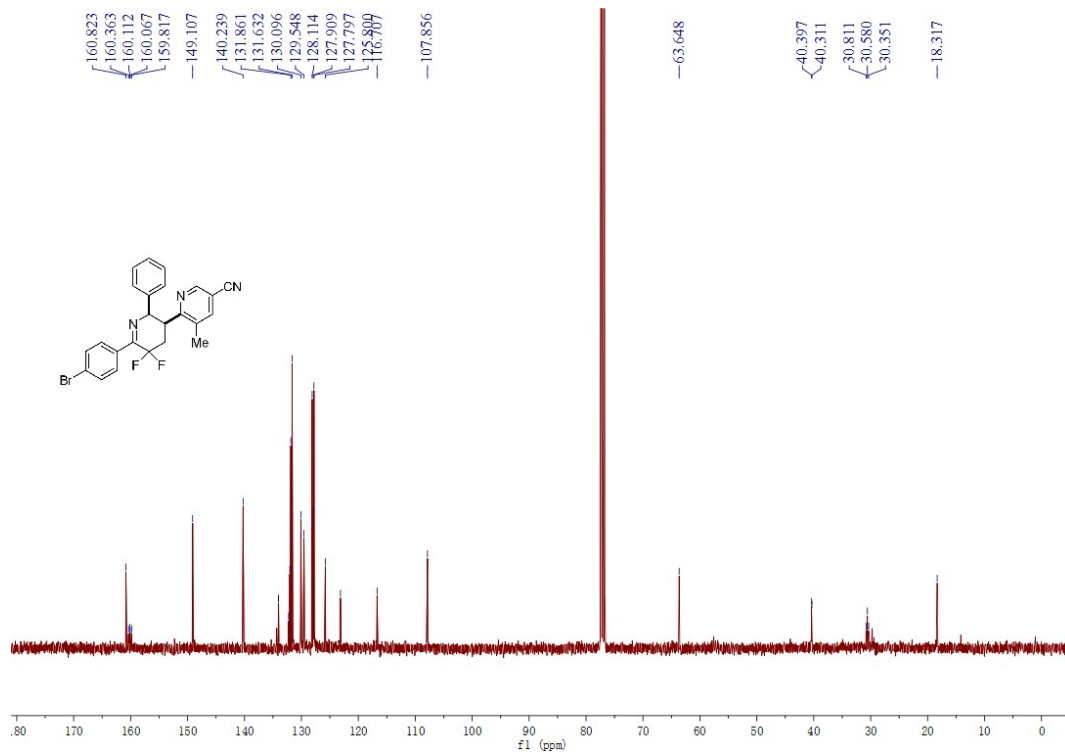

[<sup>19</sup>F\_NMR\_375 MHz]

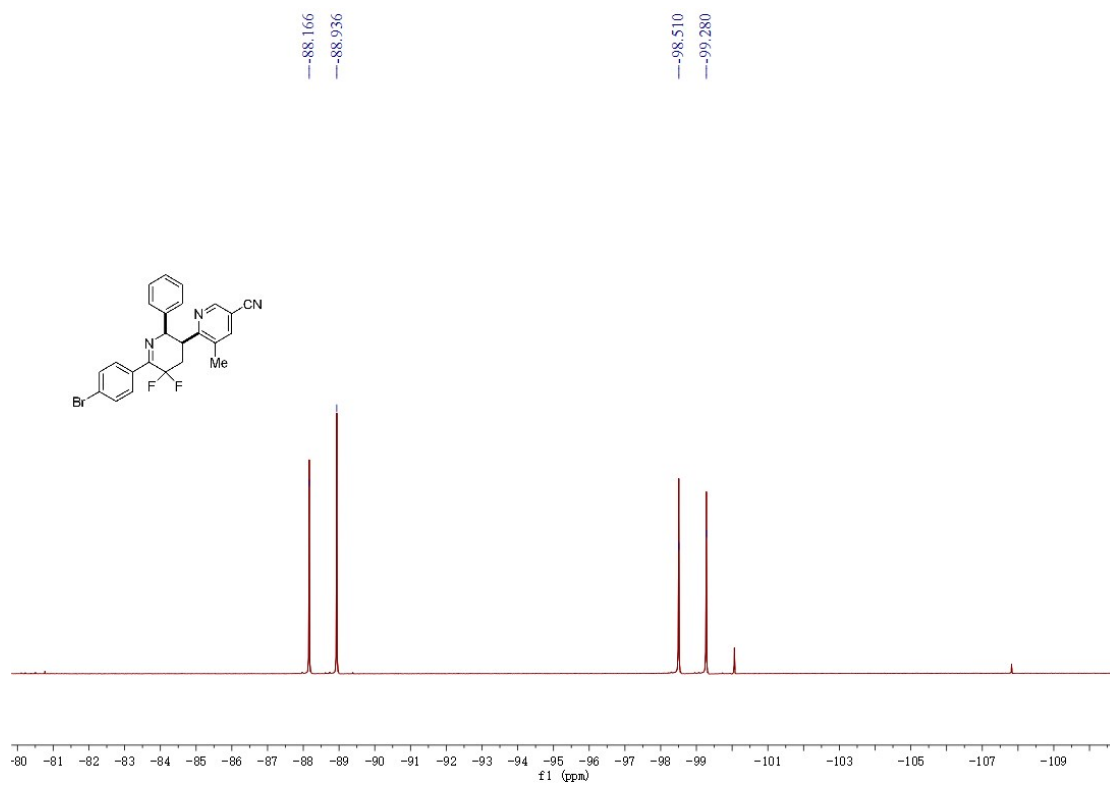

5',5'-Difluoro-6'-(3-fluorophenyl)-3-methyl-2'-phenyl-2',3',4',5'-tetrahydro-[2,3'-

### bipyridine]-5-carbonitrile (3u)

[<sup>1</sup>H\_NMR\_400 MHz\_(CDCl<sub>3</sub>: 7.26 ppm)]

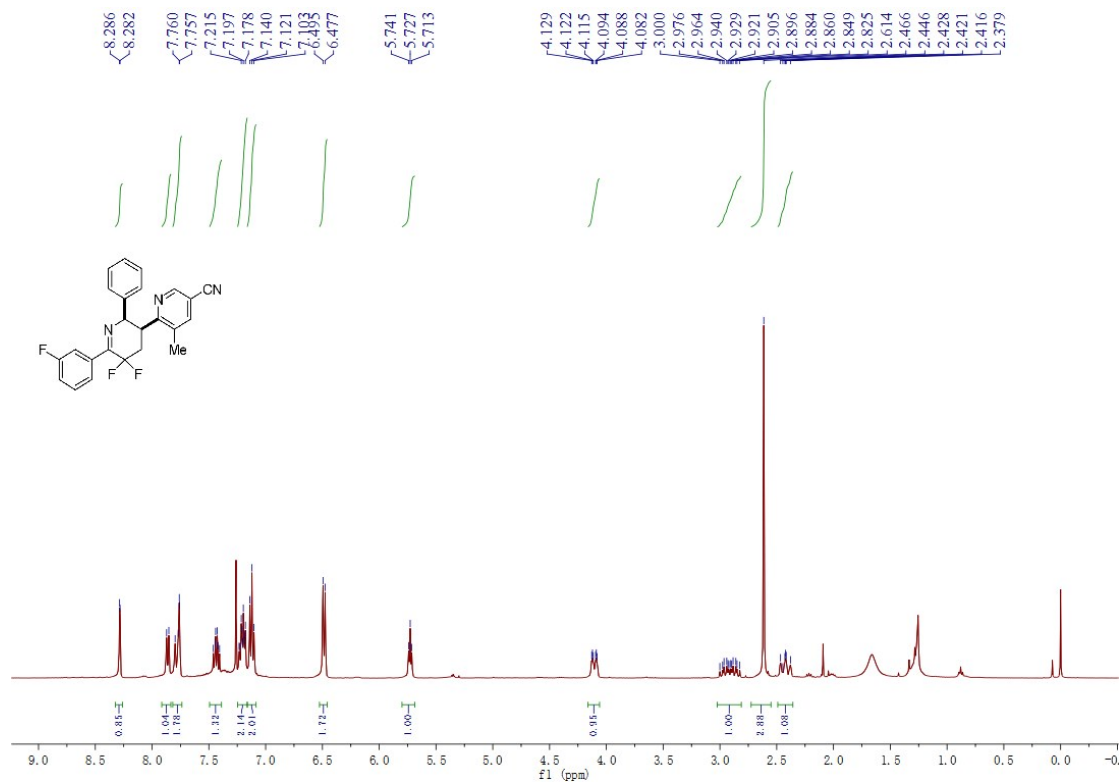

[<sup>13</sup>C\_NMR\_100 MHz\_(CDCl<sub>3</sub>: 77.00 ppm)]

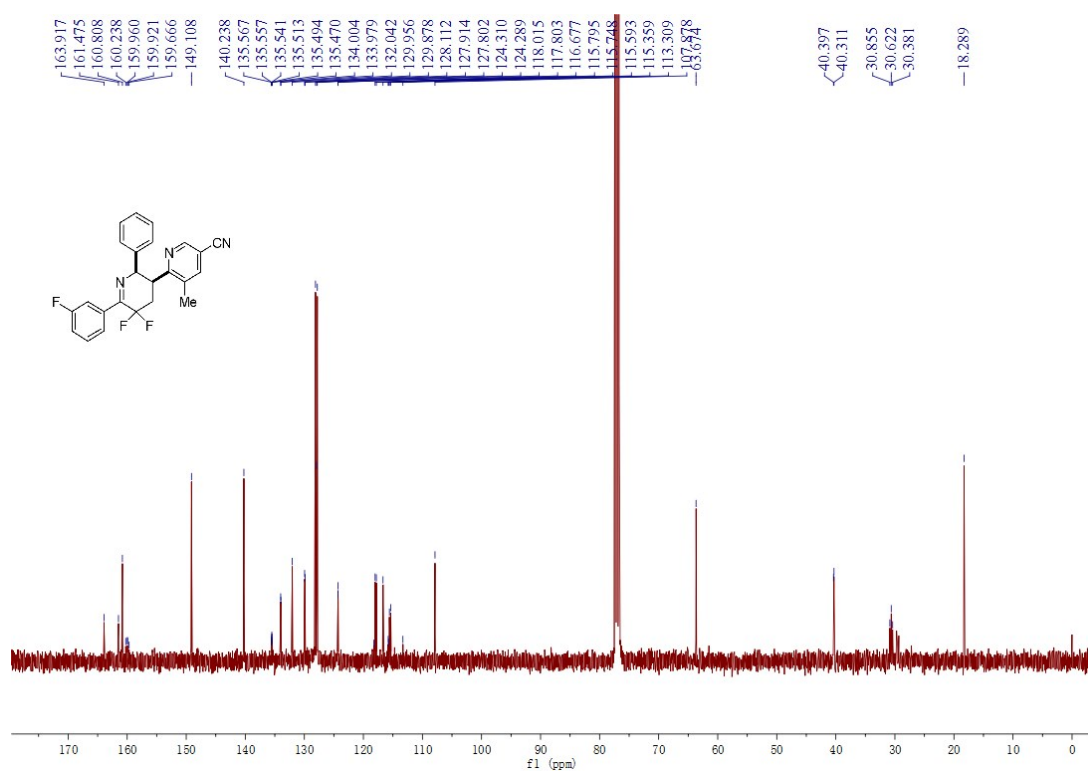

[<sup>19</sup>F\_NMR\_375 MHz]

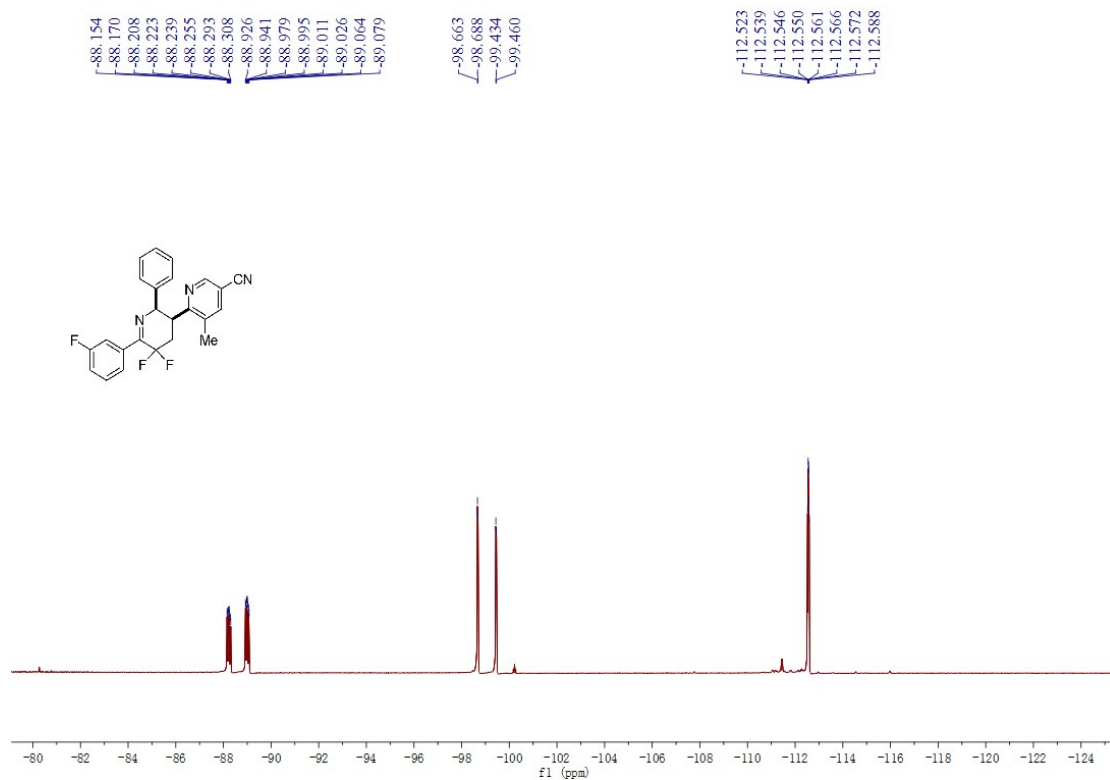



**6'-(3-Chlorophenyl)-5',5'-difluoro-3-methyl-2'-phenyl-2',3',4',5'-tetrahydro-[2,3'-bipyridine]-5-carbonitrile (3v)**

[<sup>1</sup>H\_NMR\_400 MHz\_(CDCl<sub>3</sub>: 7.26 ppm)]

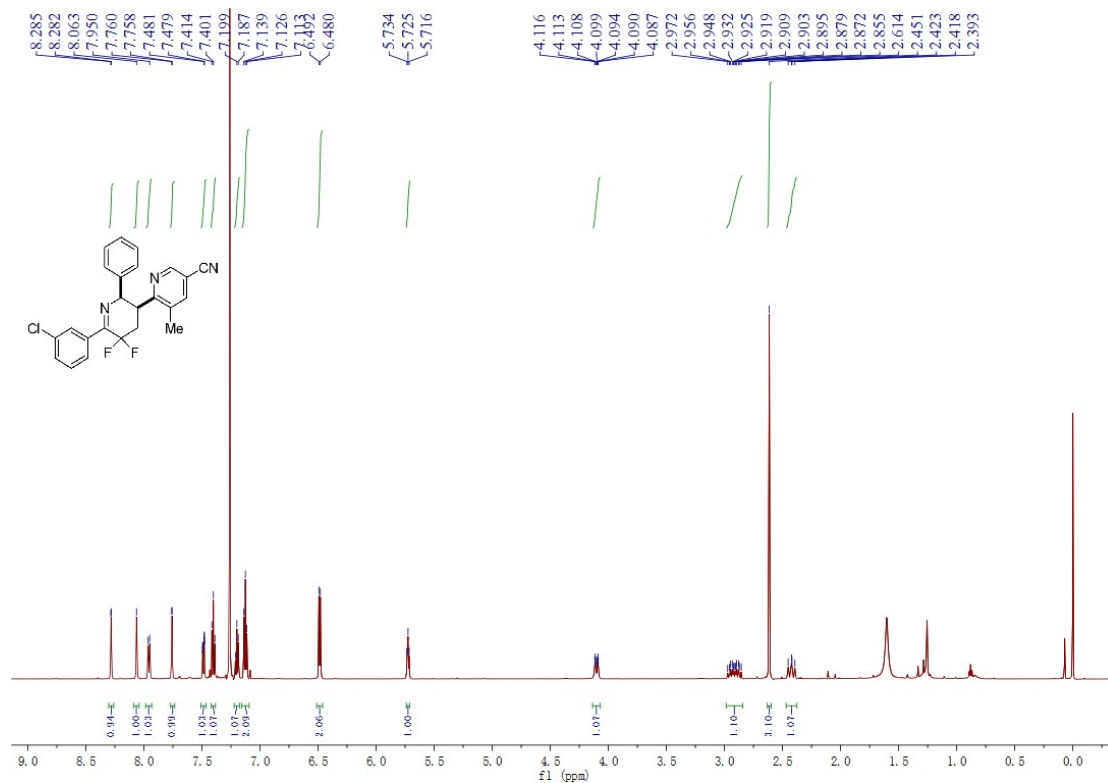

[<sup>13</sup>C\_NMR\_100 MHz\_(CDCl<sub>3</sub>: 77.00 ppm)]

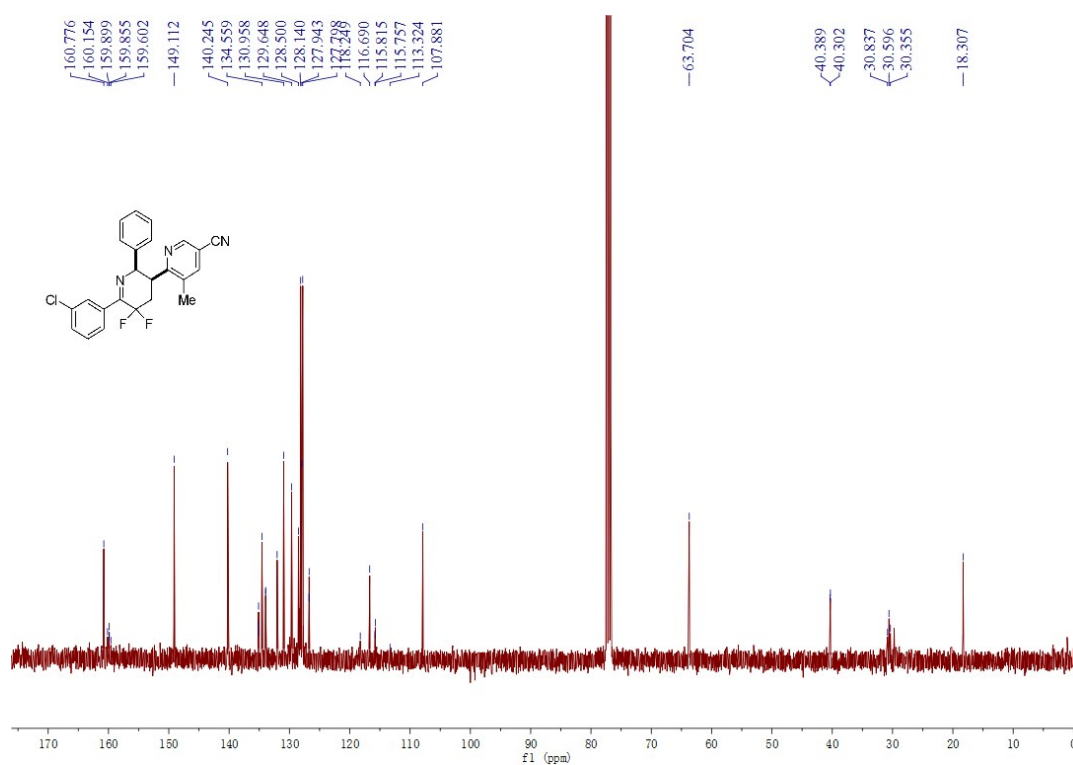

[<sup>19</sup>F\_NMR\_375 MHz]

--88.181  
--88.952

--98.739  
--99.511

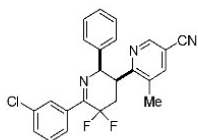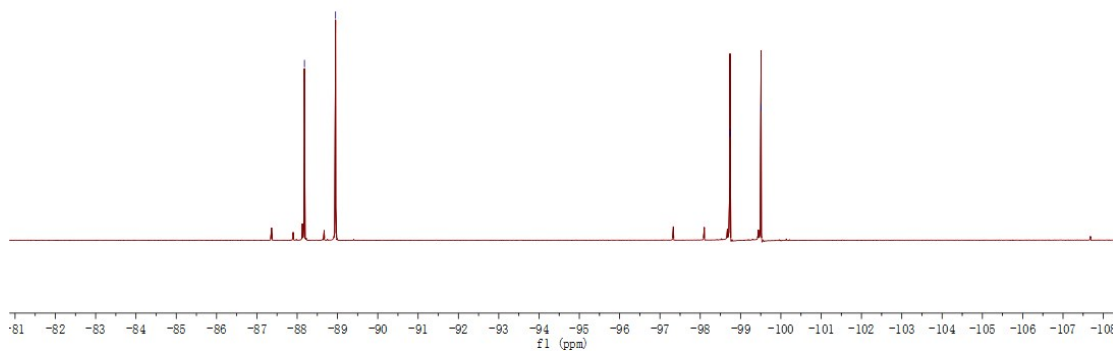

**6'-(3-Bromophenyl)-5',5'-difluoro-3-methyl-2'-phenyl-2',3',4',5'-tetrahydro-[2,3'-bipyridine]-5-carbonitrile (3w)**

[<sup>1</sup>H\_NMR\_400 MHz\_(CDCl<sub>3</sub>: 7.26 ppm)]

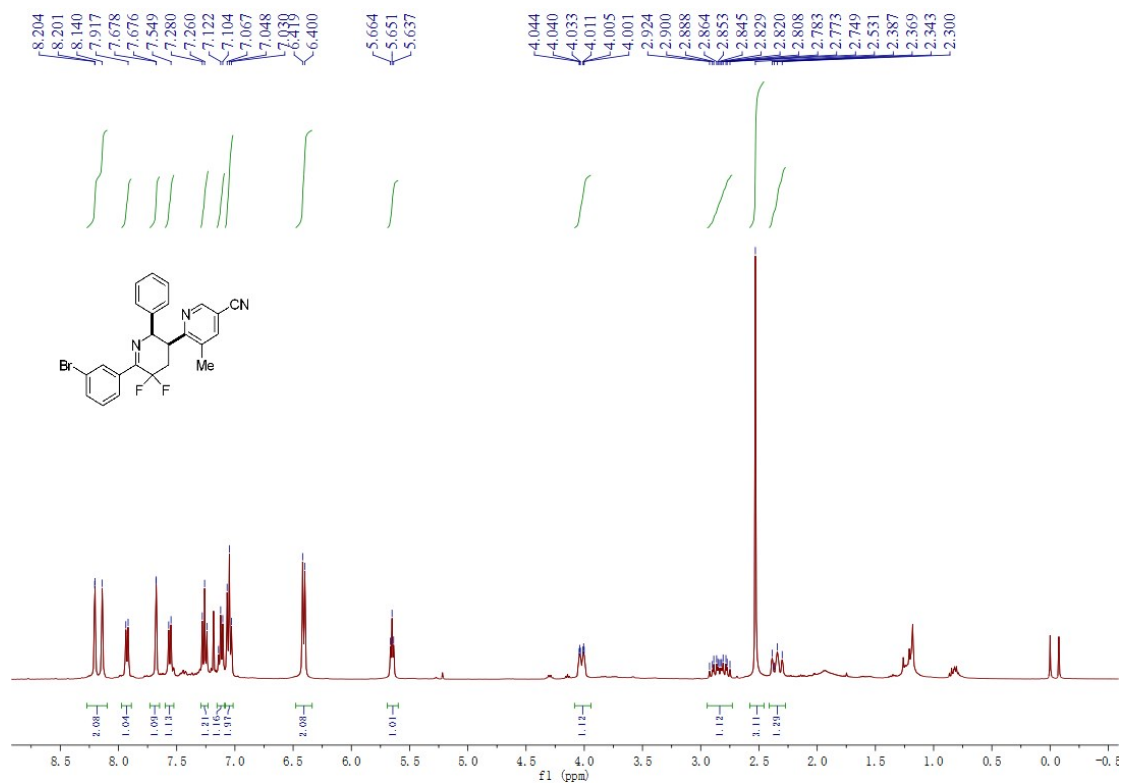

[<sup>13</sup>C\_NMR\_100 MHz\_(CDCl<sub>3</sub>: 77.00 ppm)]

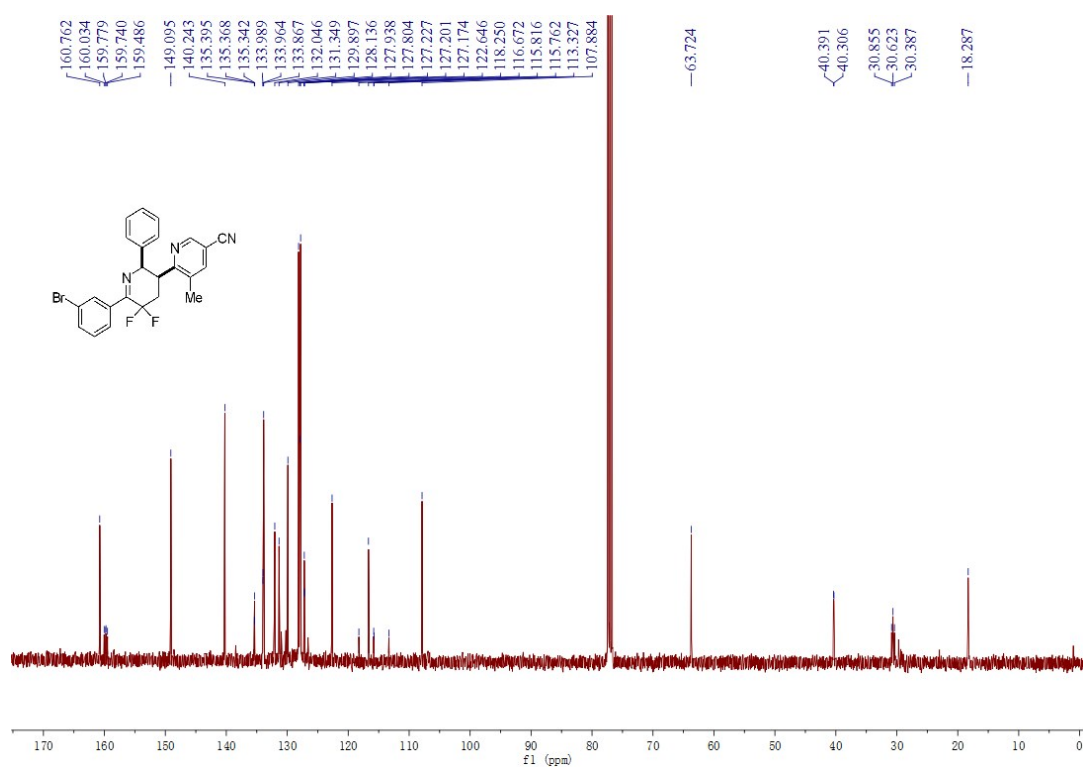

[<sup>19</sup>F\_NMR\_375 MHz]

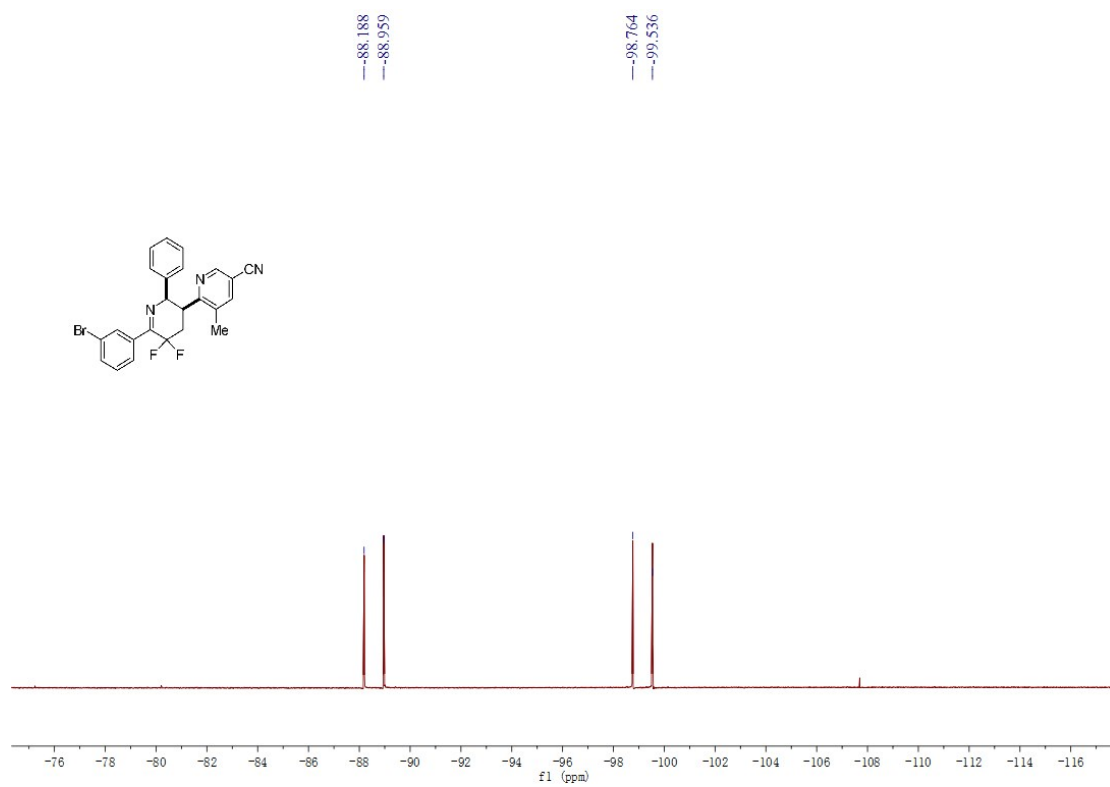

**5',5'-Difluoro-2'-(4-fluorophenyl)-3-methyl-6'-phenyl-2',3',4',5'-tetrahydro-[2,3'-bipyridine]-5-carbonitrile (3x)**

[<sup>1</sup>H\_NMR\_400 MHz\_(CDCl<sub>3</sub>: 7.26 ppm)]

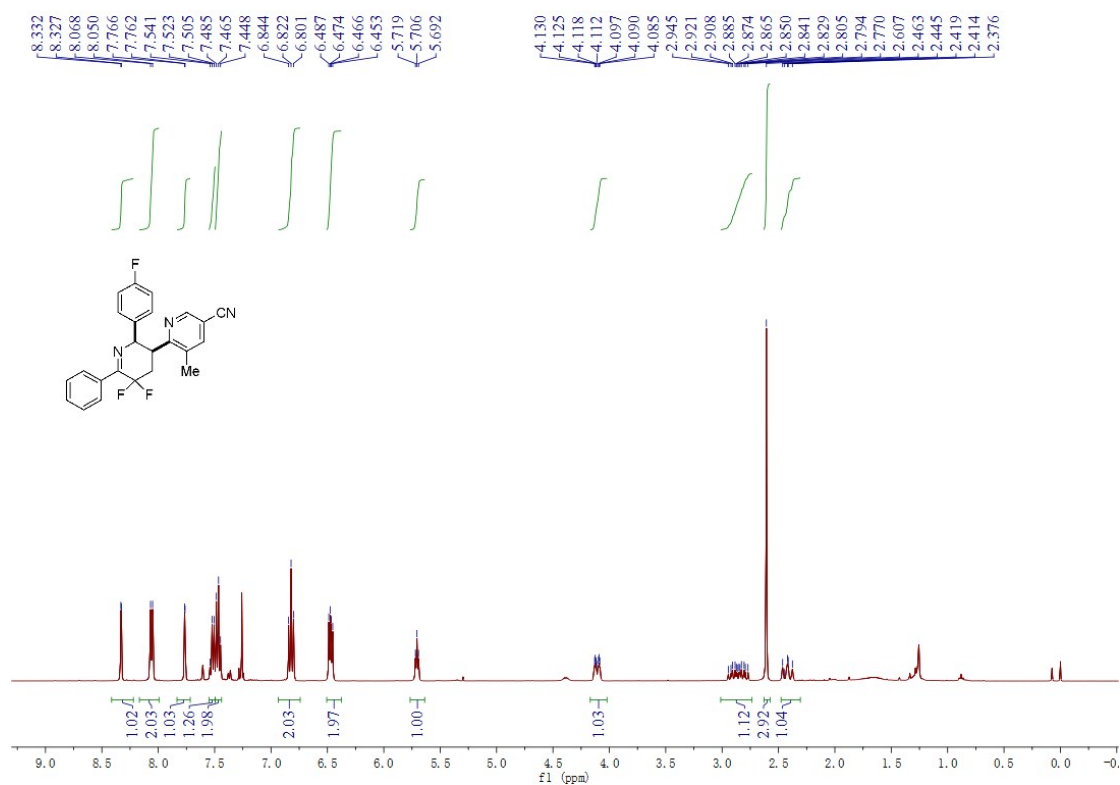

[<sup>13</sup>C\_NMR\_100 MHz\_(CDCl<sub>3</sub>: 77.00 ppm)]

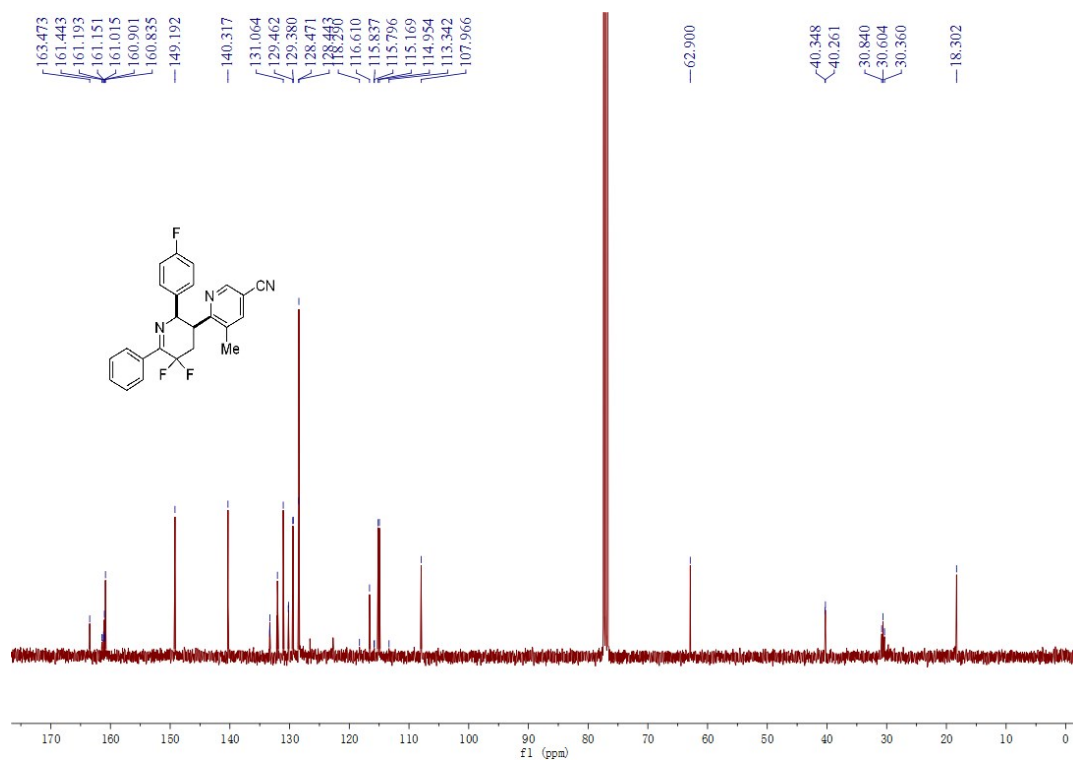

[<sup>19</sup>F\_NMR\_375 MHz]

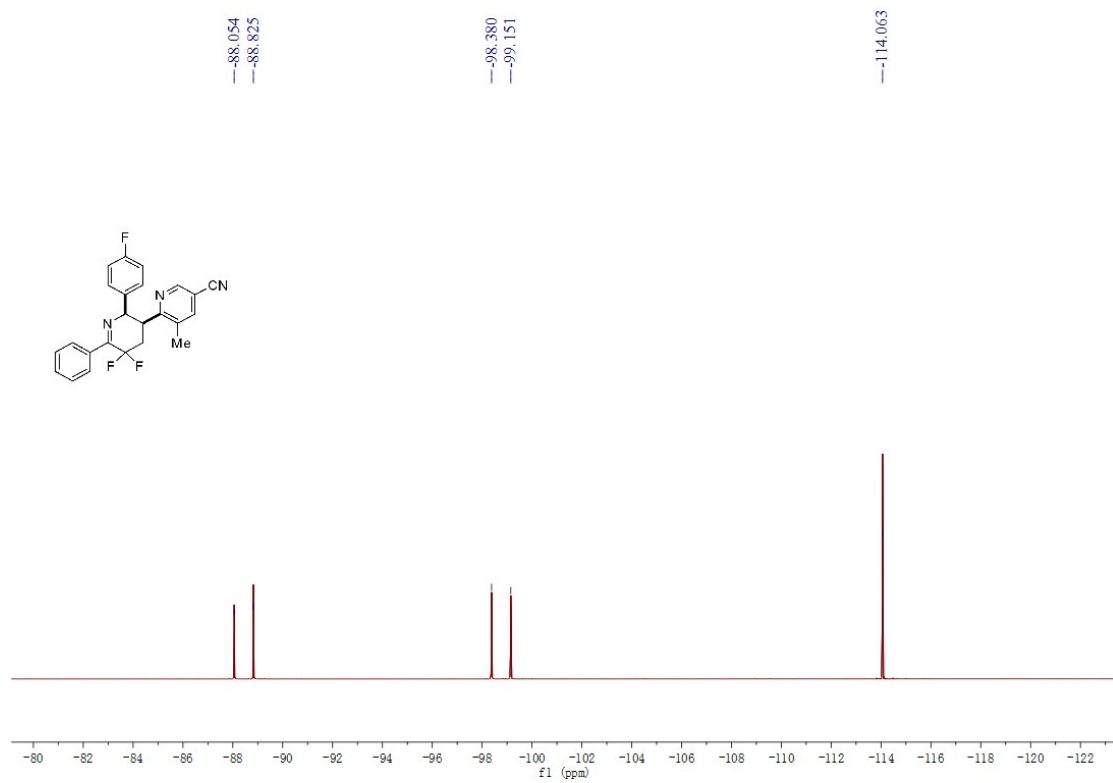

**2'-(4-Chlorophenyl)-5',5'-difluoro-3-methyl-6'-phenyl-2',3',4',5'-tetrahydro-[2,3'-bipyridine]-5-carbonitrile (3y)**

[<sup>1</sup>H\_NMR\_400 MHz\_(CDCl<sub>3</sub>: 7.26 ppm)]

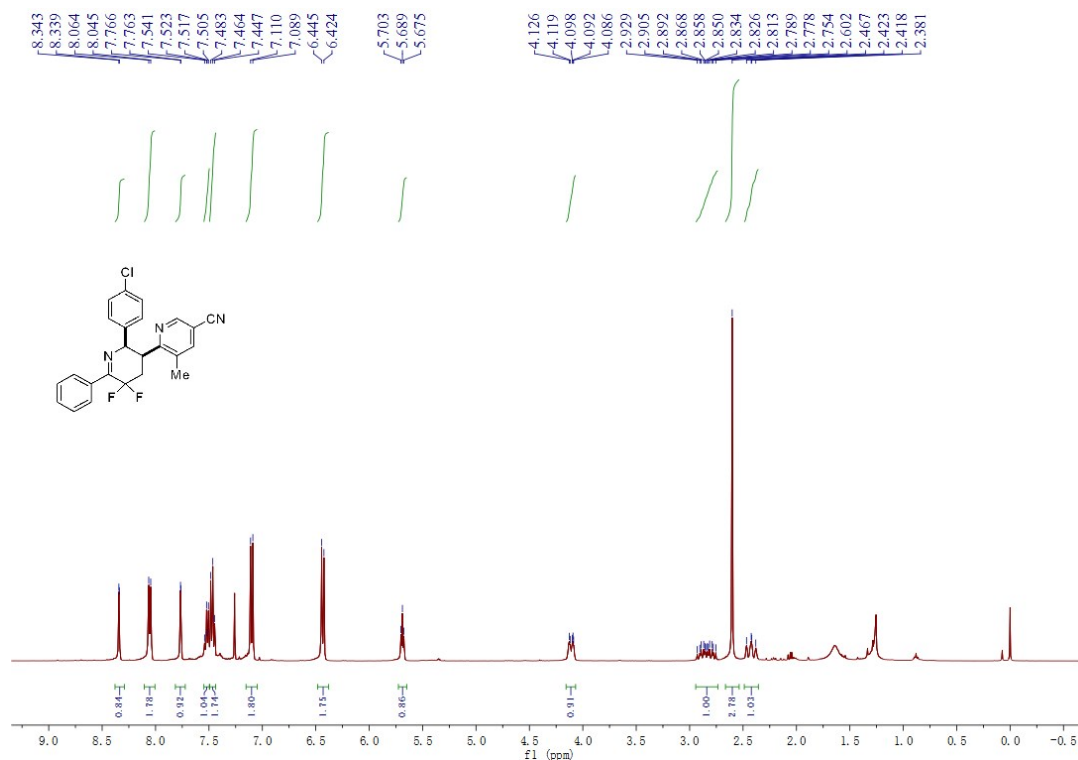

[<sup>13</sup>C\_NMR\_100 MHz\_(CDCl<sub>3</sub>: 77.00 ppm)]

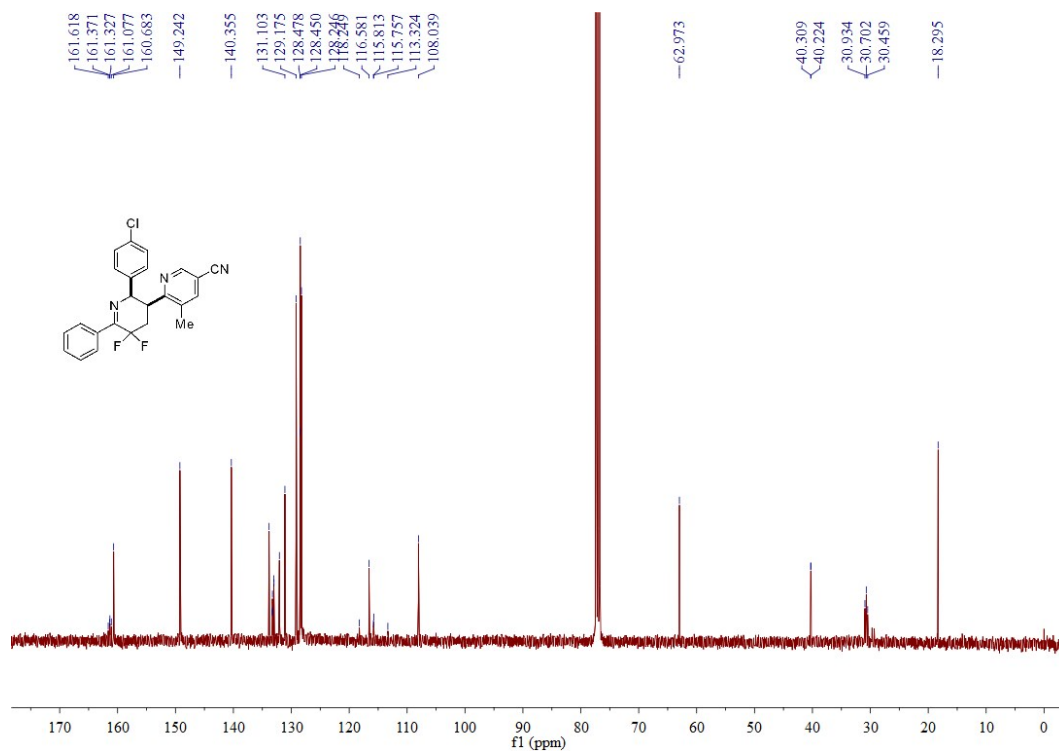

[<sup>19</sup>F\_NMR\_375 MHz]

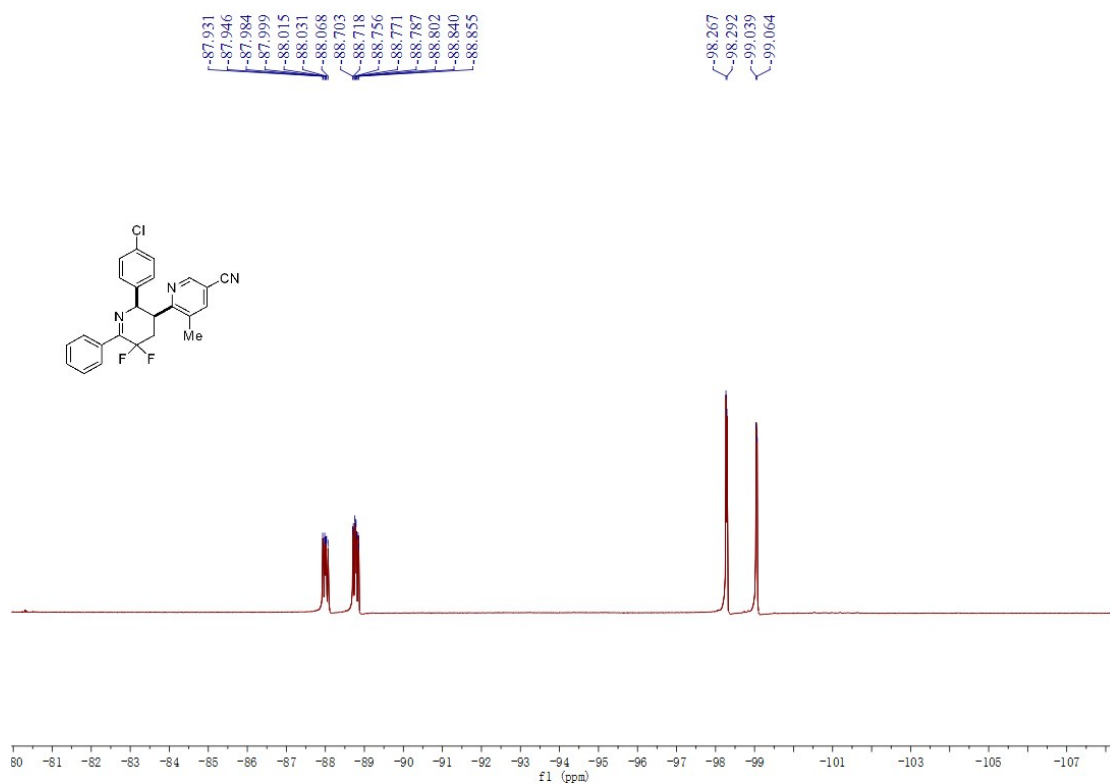



**2'-(4-Bromophenyl)-5',5'-difluoro-3-methyl-6'-phenyl-2',3',4',5'-tetrahydro-[2,3'-bipyridine]-5-carbonitrile (3z)**

[<sup>1</sup>H\_NMR\_400 MHz\_(CDCl<sub>3</sub>: 7.26 ppm)]

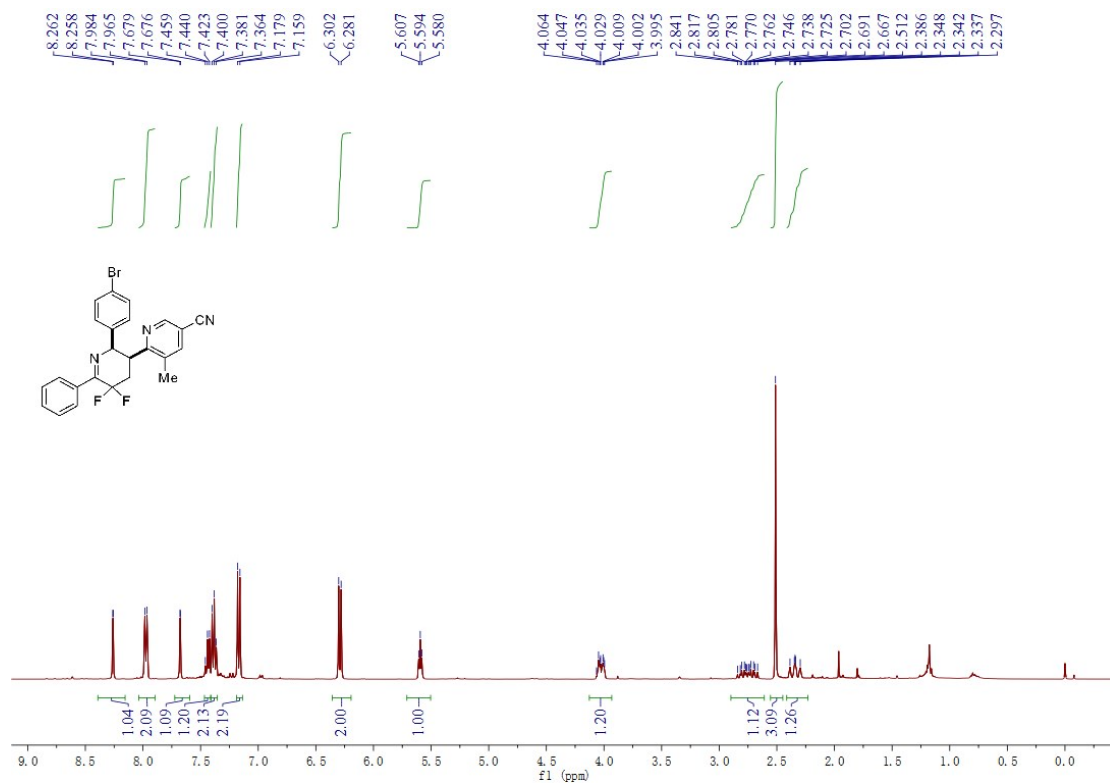

[<sup>13</sup>C\_NMR\_100 MHz\_(CDCl<sub>3</sub>: 77.00 ppm)]

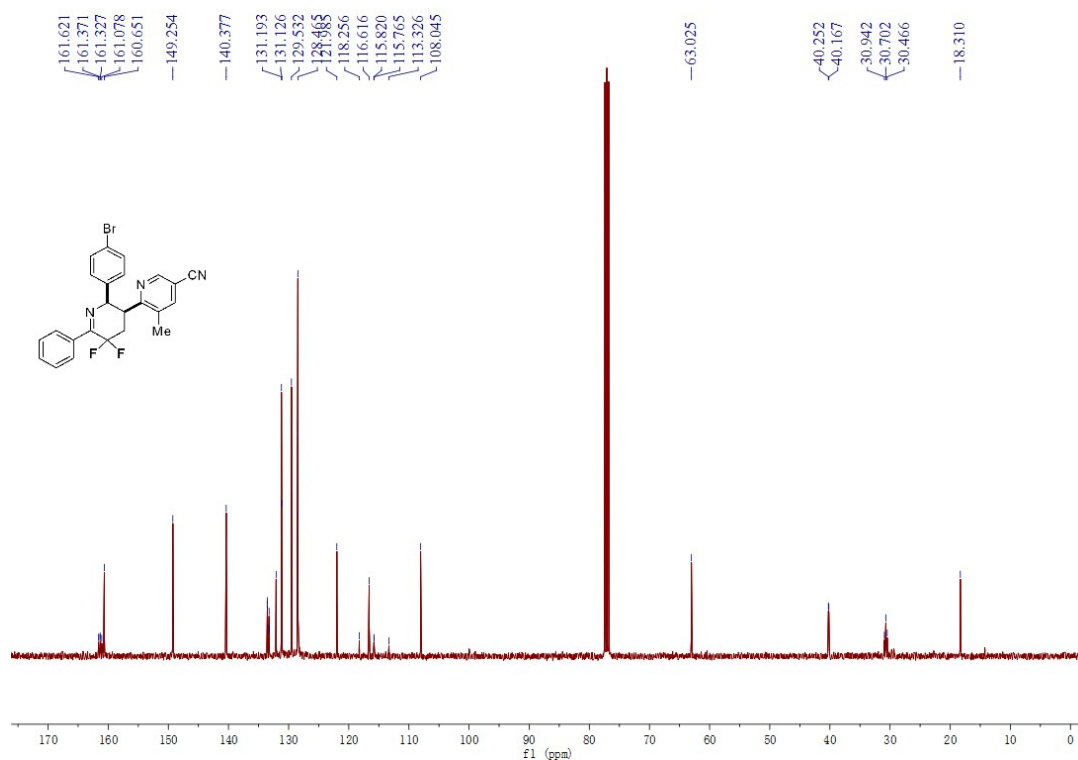

[<sup>19</sup>F\_NMR\_375 MHz]

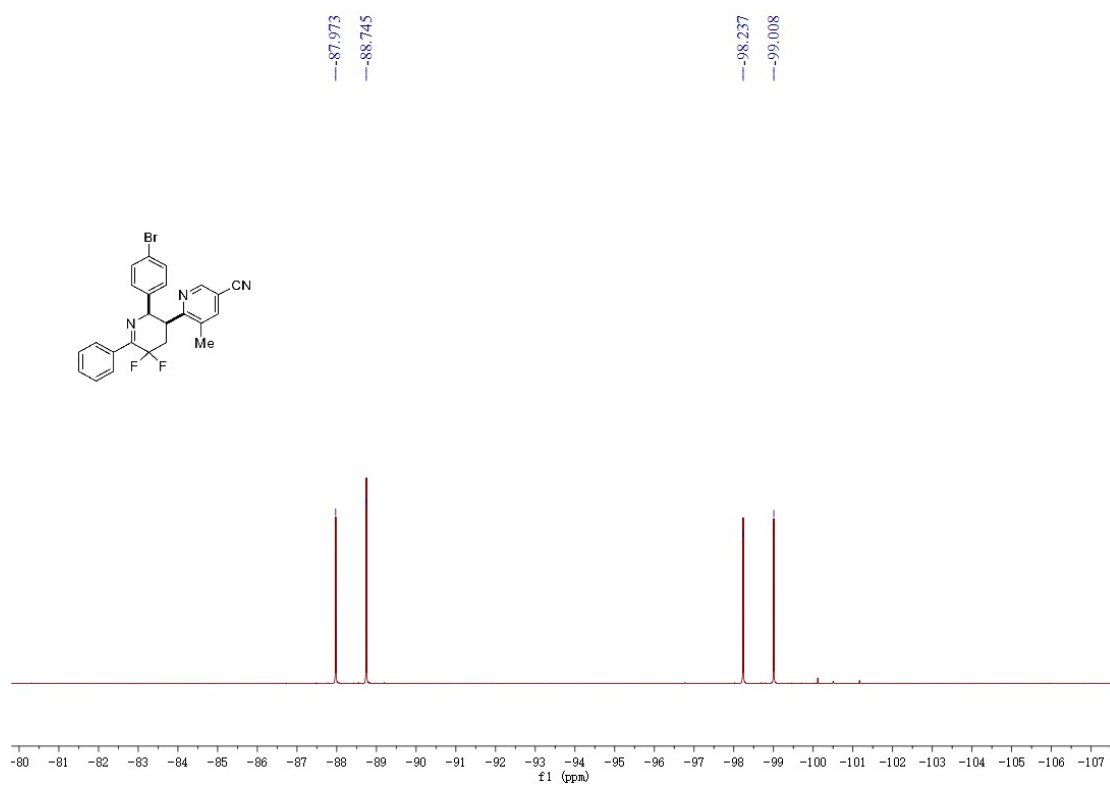

**5',5'-Difluoro-2'-(3-fluorophenyl)-3-methyl-6'-phenyl-2',3',4',5'-tetrahydro-[2,3'-bipyridine]-5-carbonitrile (3aa)**

[<sup>1</sup>H\_NMR\_400 MHz\_(CDCl<sub>3</sub>: 7.26 ppm)]

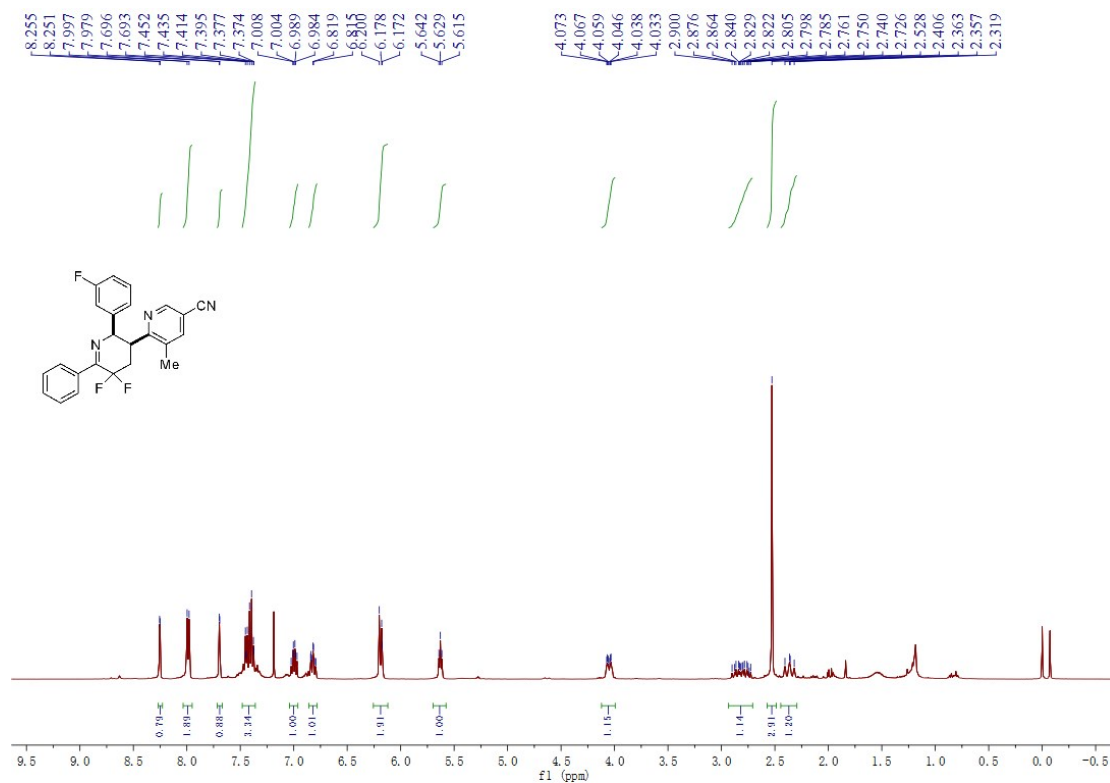

[<sup>13</sup>C\_NMR\_100 MHz\_(CDCl<sub>3</sub>: 77.00 ppm)]

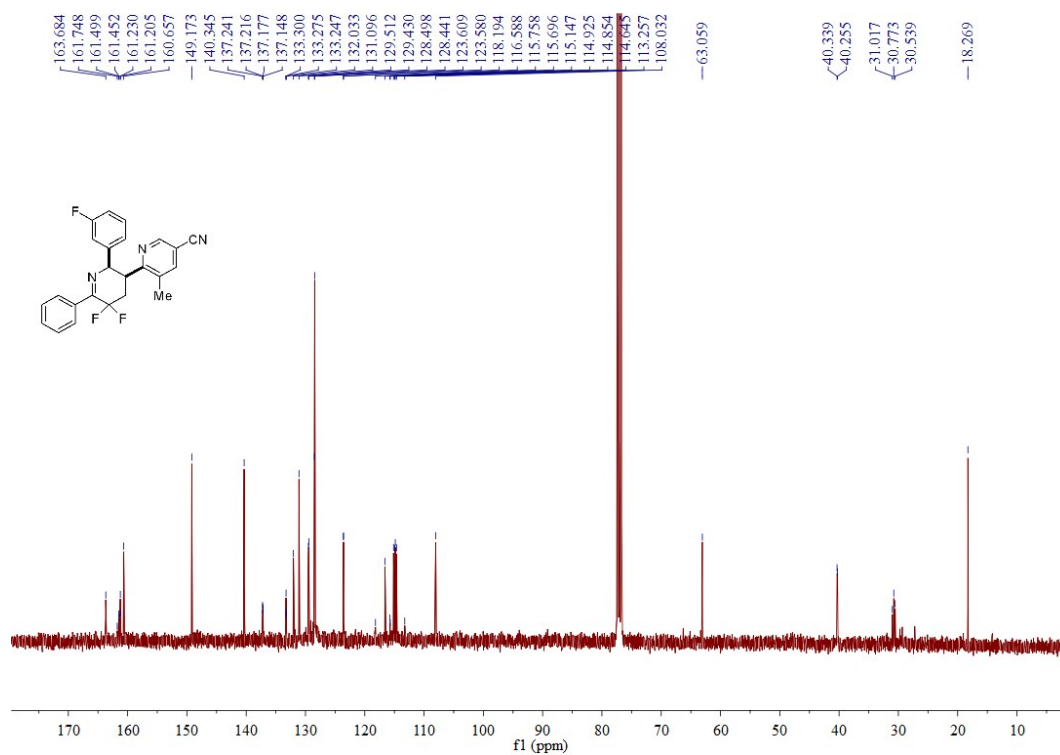

[<sup>19</sup>F\_NMR\_375 MHz]

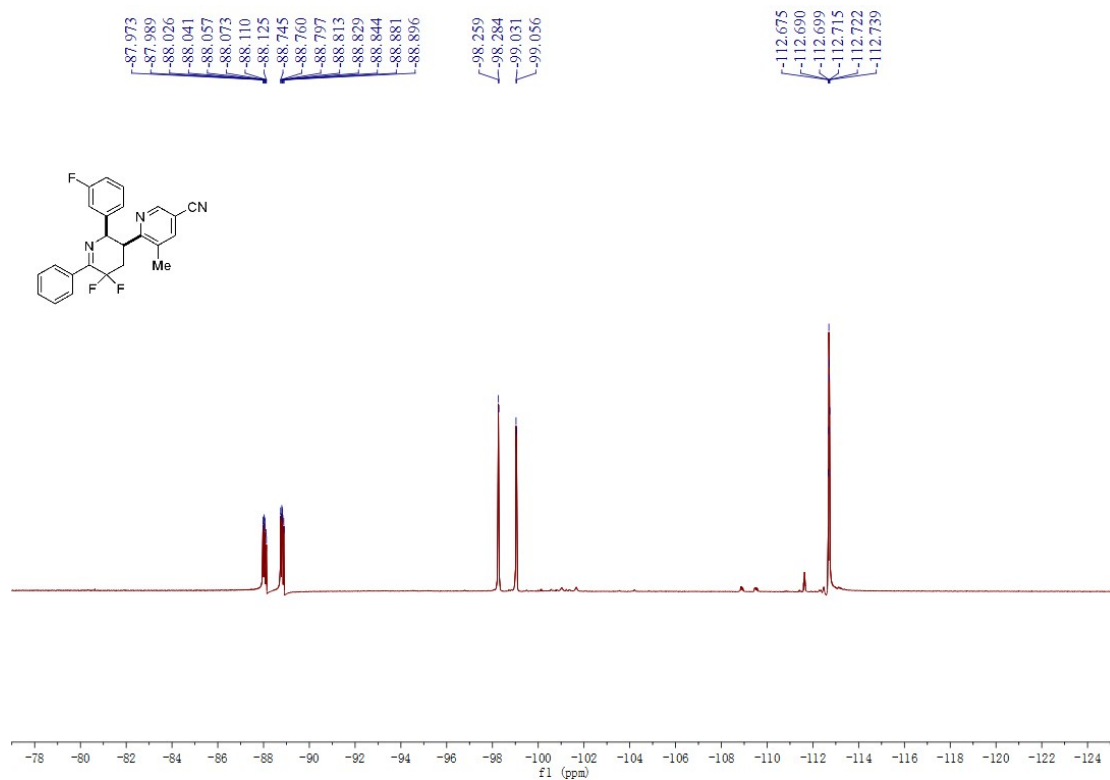

**2'-(3-Chlorophenyl)-5',5'-difluoro-3-methyl-6'-phenyl-2',3',4',5'-tetrahydro-[2,3'-bipyridine]-5-carbonitrile (3ab)**

[<sup>1</sup>H\_NMR\_400 MHz\_(CDCl<sub>3</sub>: 7.26 ppm)]

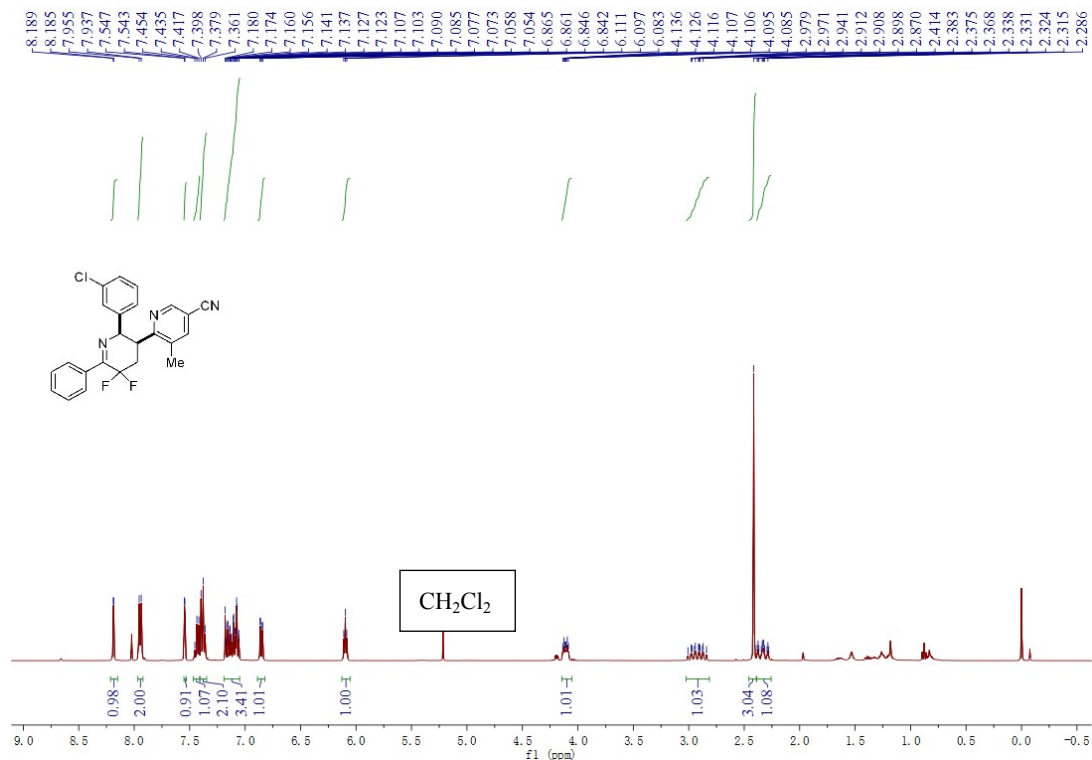

[<sup>13</sup>C\_NMR\_100 MHz\_(CDCl<sub>3</sub>: 77.00 ppm)]

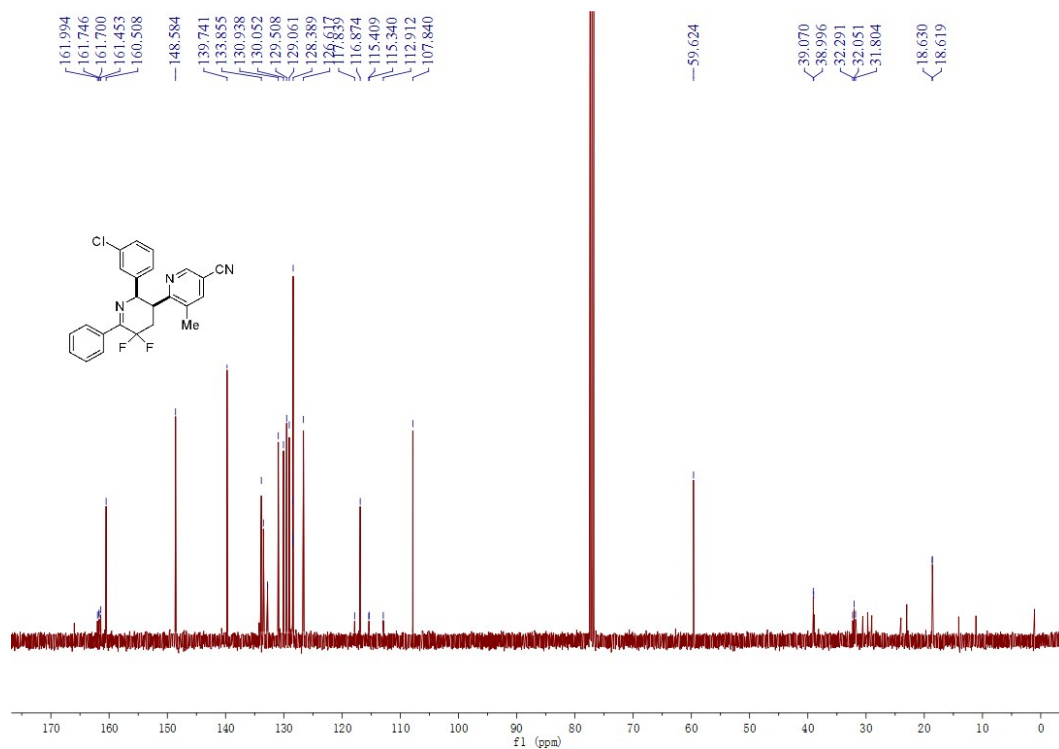

[<sup>19</sup>F\_NMR\_375 MHz]

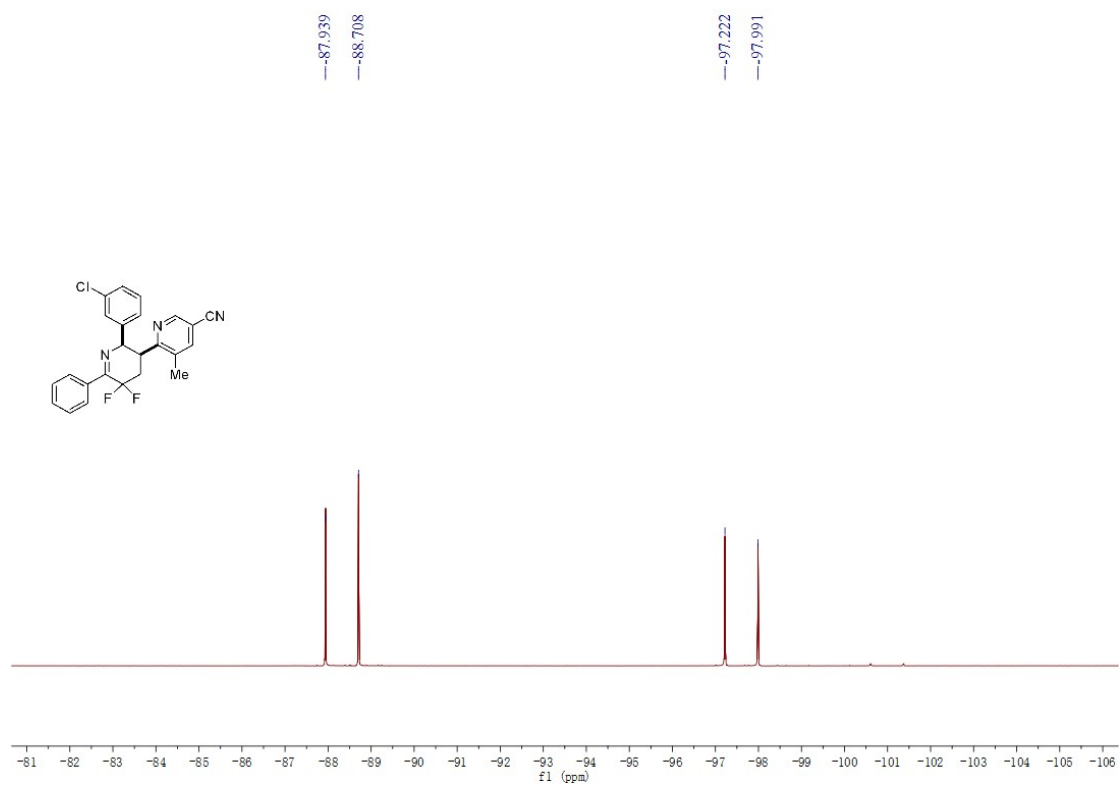

**5',5'-Difluoro-3-methyl-6'-phenyl-2'-(p-tolyl)-2',3',4',5'-tetrahydro-[2,3'-bipyridine]-5-carbonitrile (3ac)**

[<sup>1</sup>H\_NMR\_400 MHz\_(CDCl<sub>3</sub>: 7.26 ppm)]

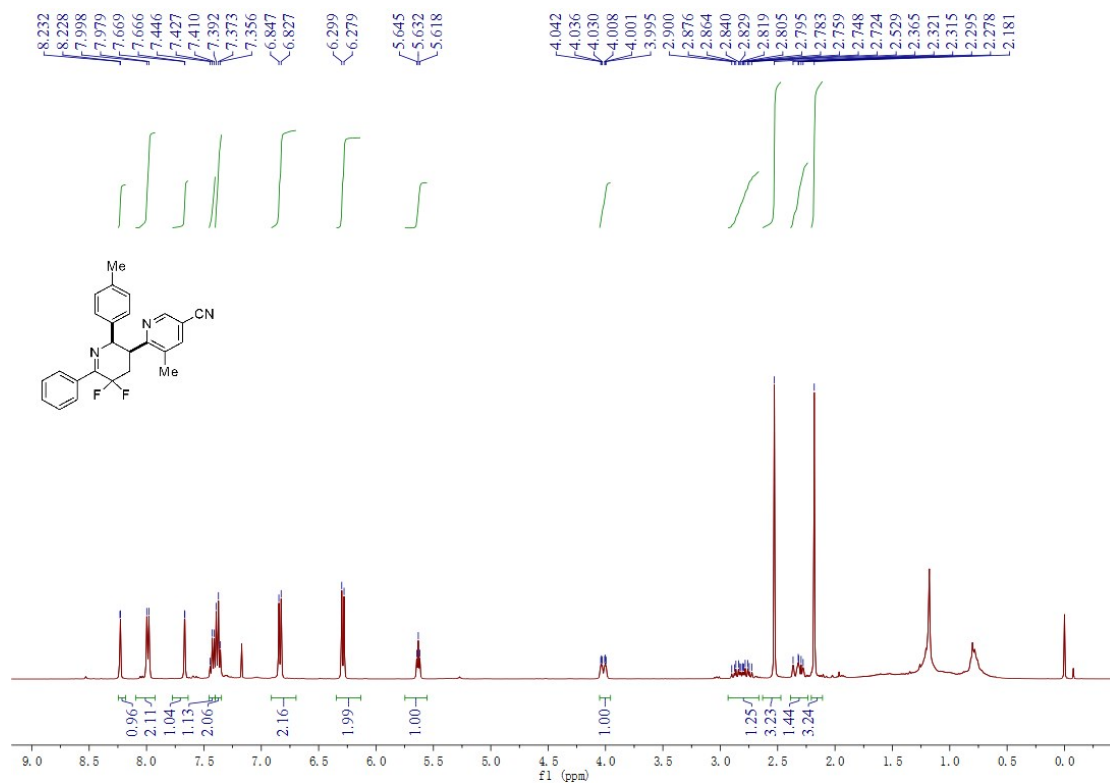

[<sup>13</sup>C\_NMR\_100 MHz\_(CDCl<sub>3</sub>: 77.00 ppm)]

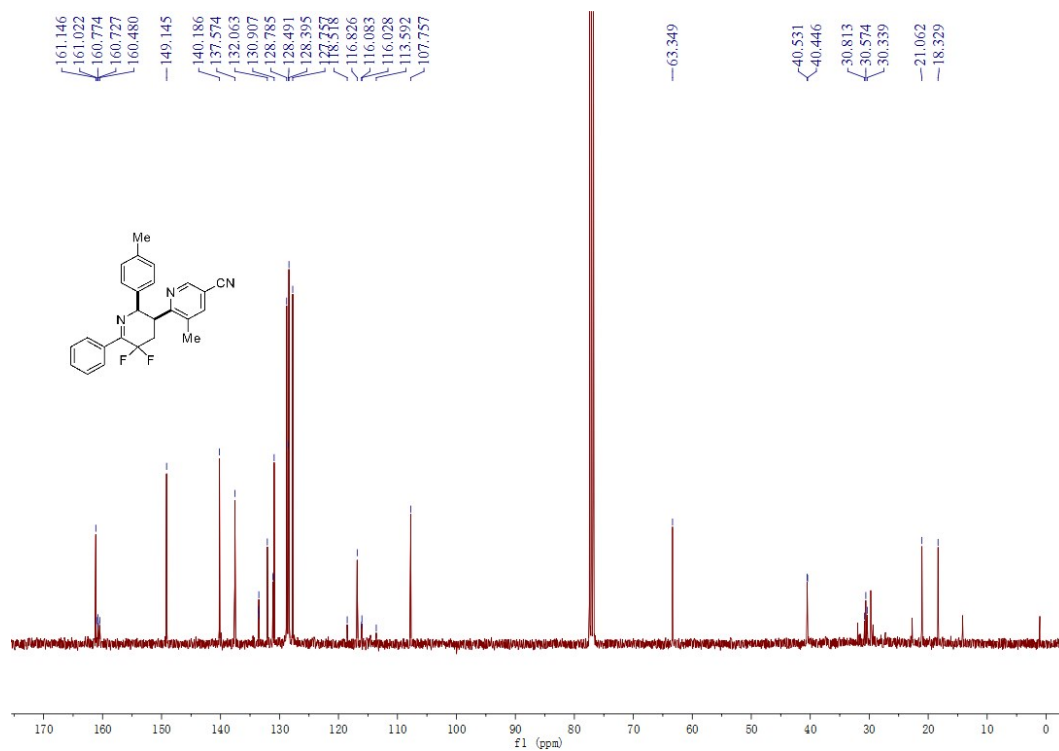

[<sup>19</sup>F\_NMR\_375 MHz]

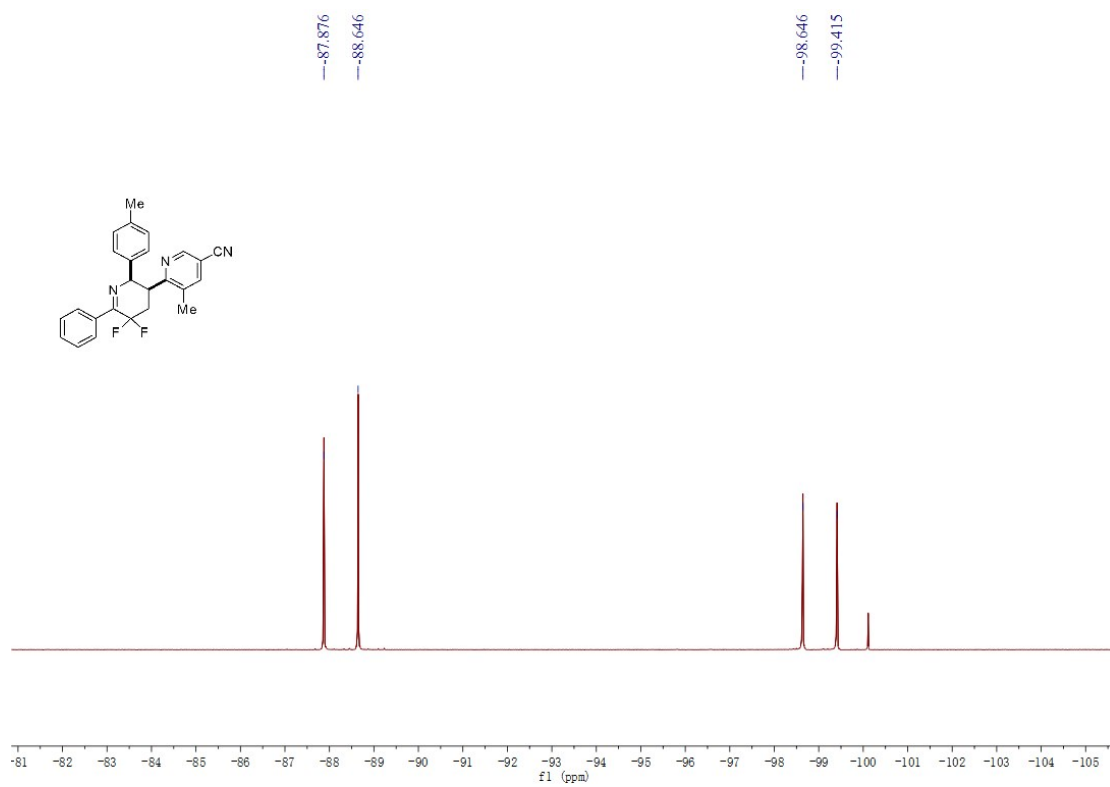



**5',5'-Difluoro-2'-(4-methoxyphenyl)-3-methyl-6'-phenyl-2',3',4',5'-tetrahydro-[2,3'-bipyridine]-5-carbonitrile (3ad)**

[<sup>1</sup>H\_NMR\_400 MHz\_(CDCl<sub>3</sub>: 7.26 ppm)]

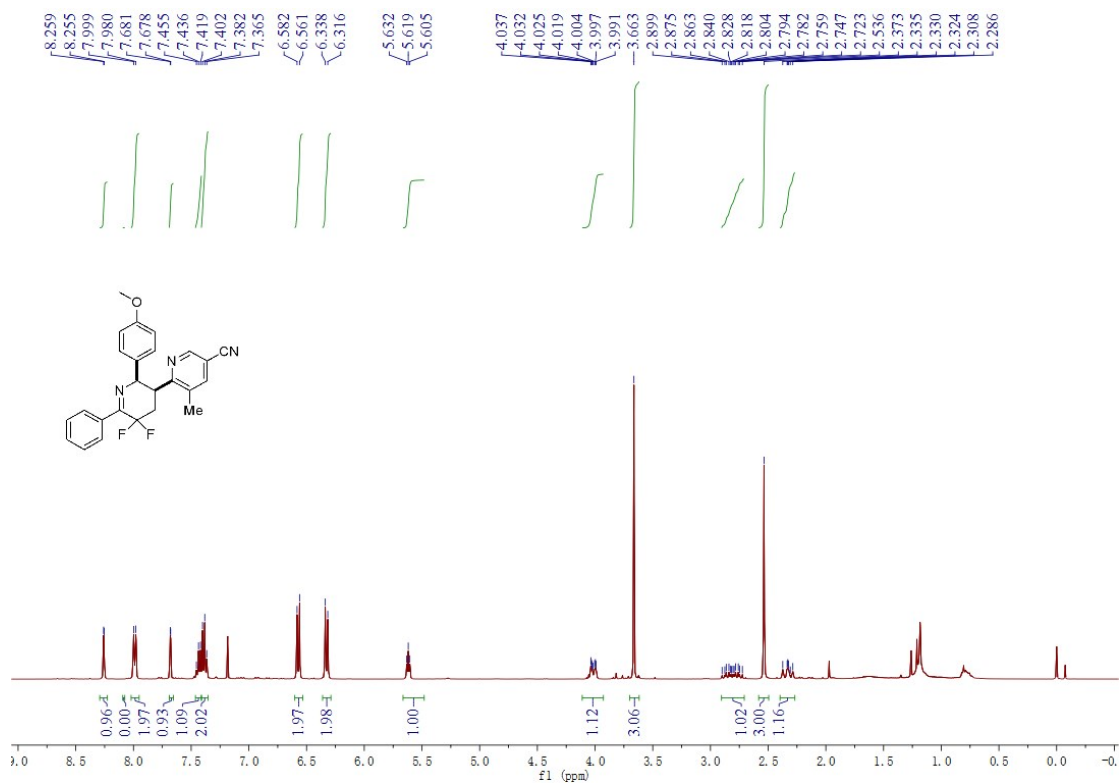

[<sup>13</sup>C\_NMR\_100 MHz\_(CDCl<sub>3</sub>: 77.00 ppm)]

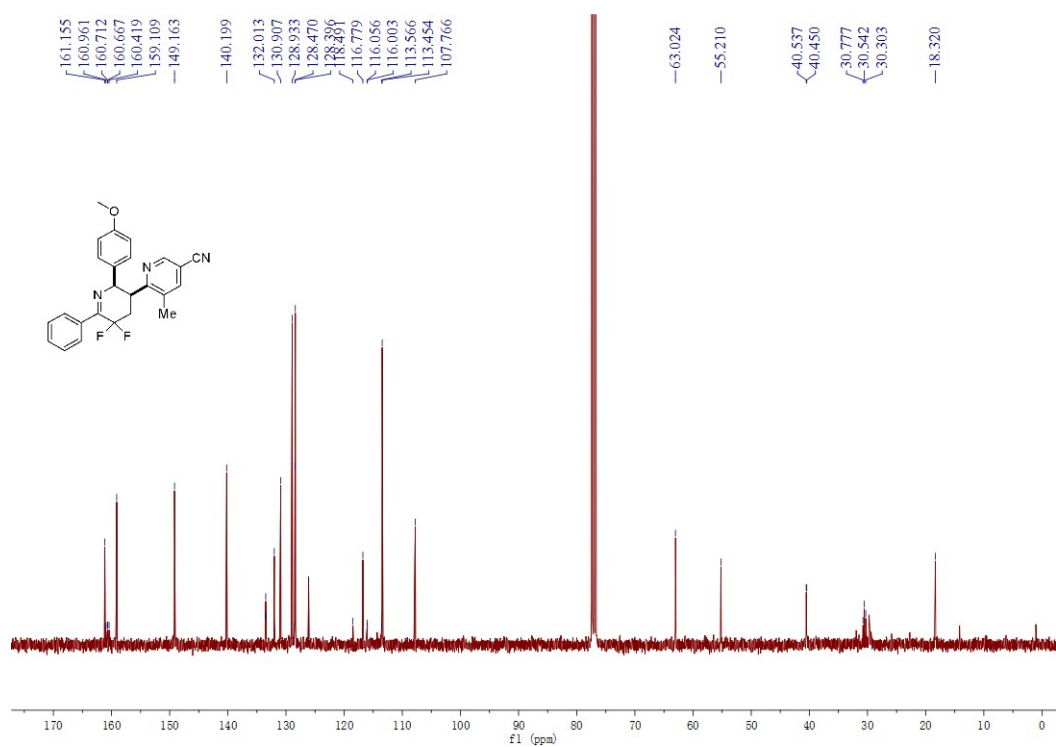

[<sup>19</sup>F\_NMR\_375 MHz]

— -87.997  
— -88.766

— -98.605  
— -99.374

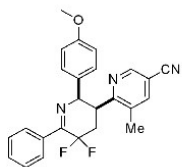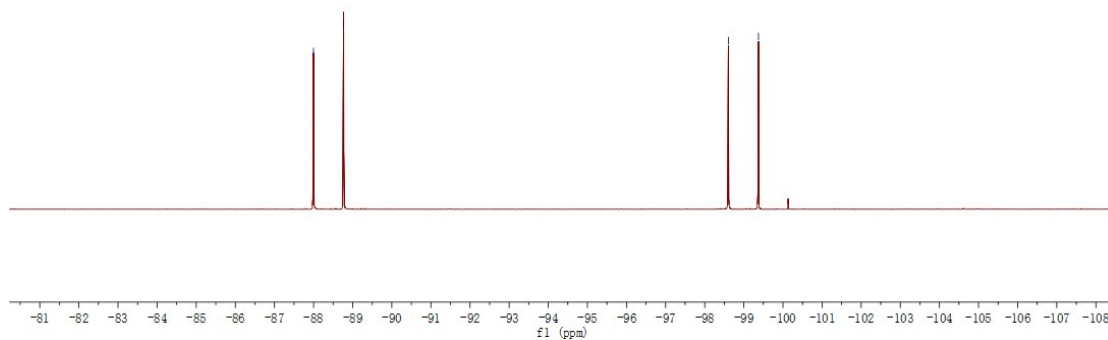

**5',5'-Difluoro-3-methyl-6'-phenyl-2'-(m-tolyl)-2',3',4',5'-tetrahydro-[2,3'-bipyridine]-5-carbonitrile (3ae)**

[<sup>1</sup>H\_NMR\_400 MHz\_(CDCl<sub>3</sub>: 7.26 ppm)]

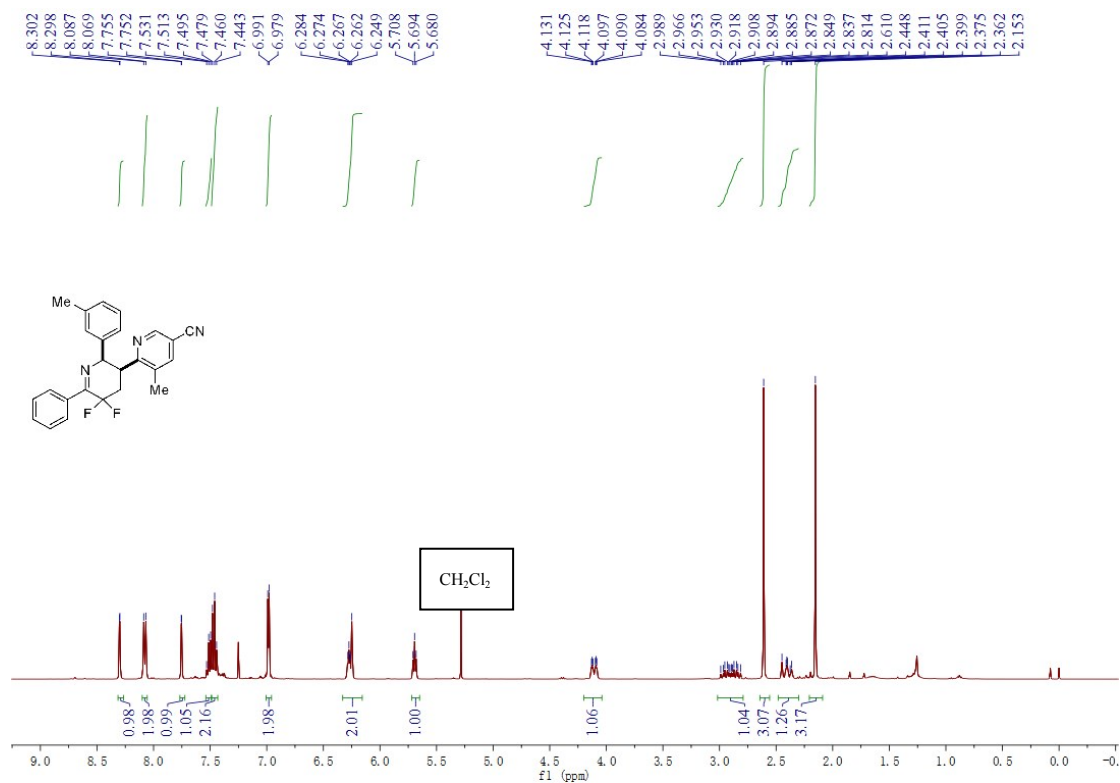

[<sup>13</sup>C\_NMR\_100 MHz\_(CDCl<sub>3</sub>: 77.00 ppm)]

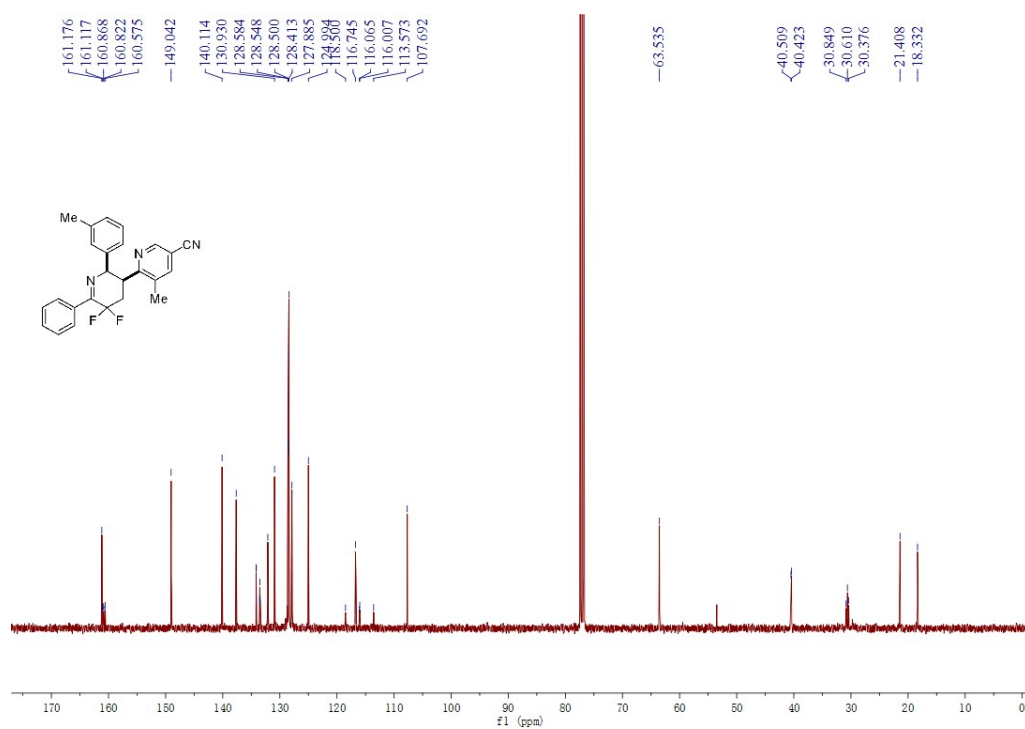

[<sup>19</sup>F\_NMR\_375 MHz]

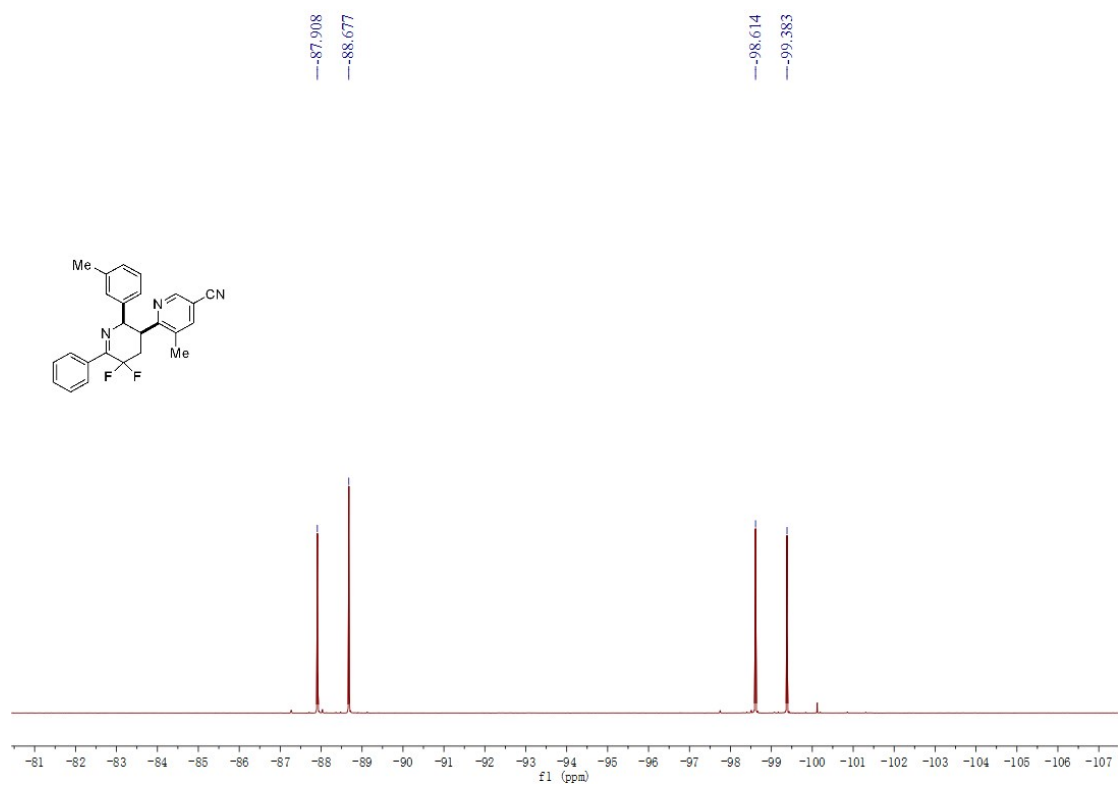

**5',5'-Difluoro-3-methyl-6'-phenyl-2'-(o-tolyl)-2',3',4',5'-tetrahydro-[2,3'-bipyridine]-5-carbonitrile (3af)**

[<sup>1</sup>H\_NMR\_400 MHz\_(CDCl<sub>3</sub>: 7.26 ppm)]

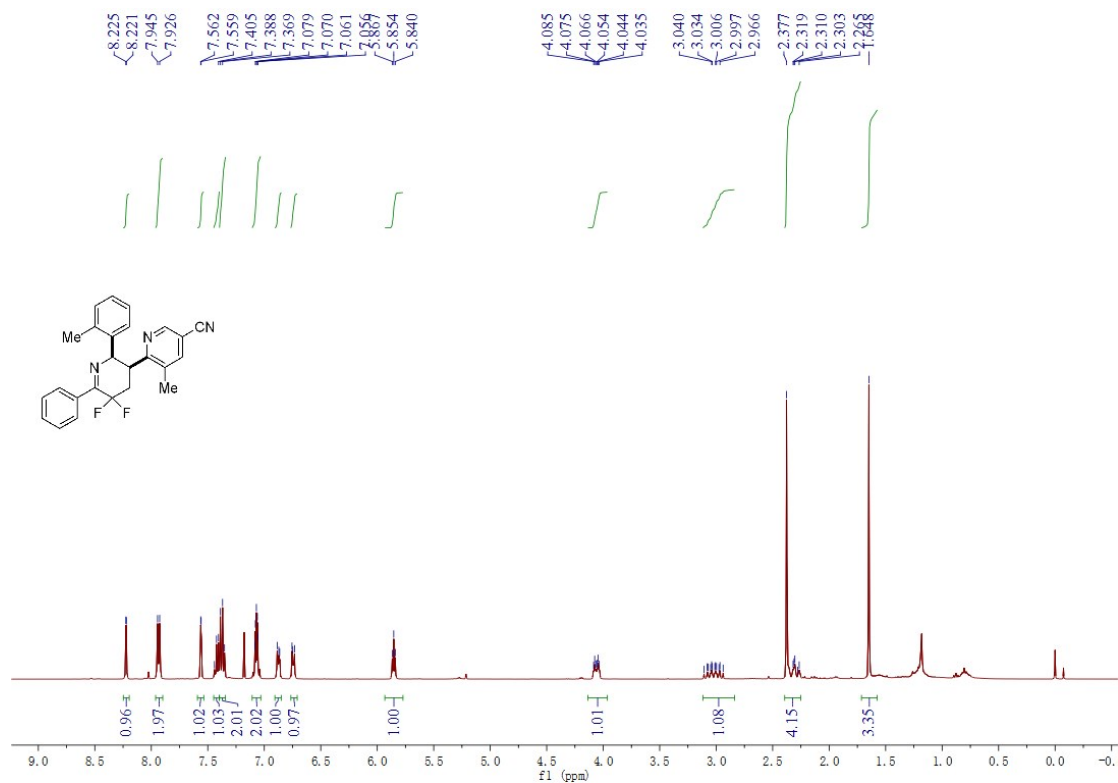

[<sup>13</sup>C\_NMR\_100 MHz\_(CDCl<sub>3</sub>: 77.00 ppm)]

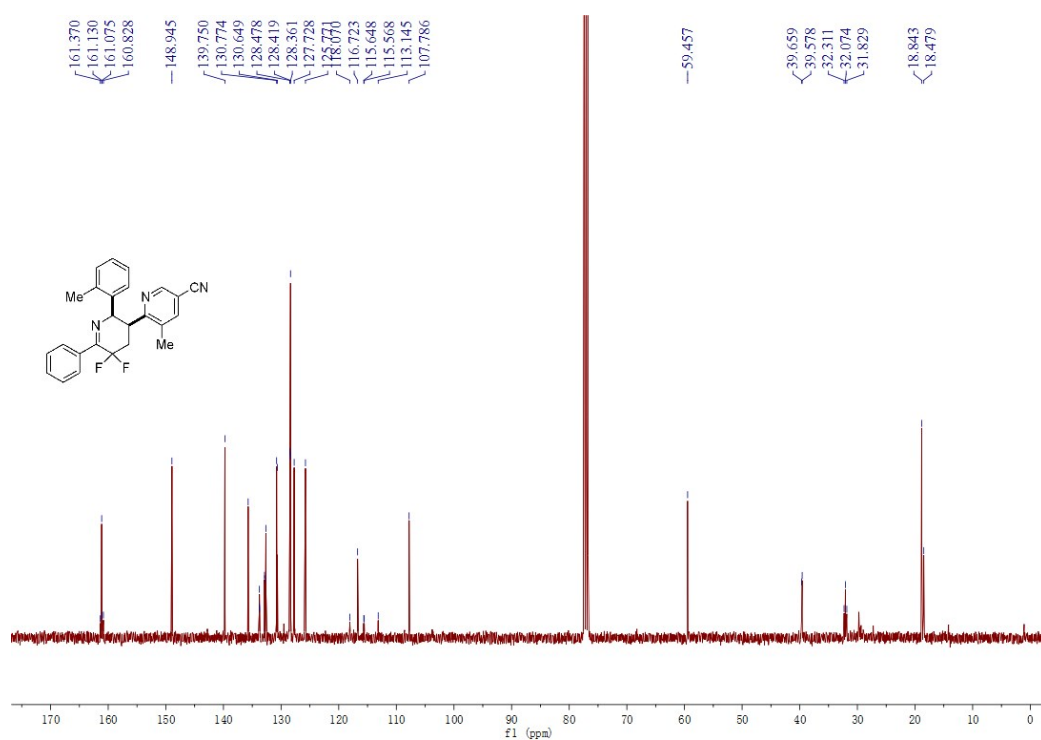

[<sup>19</sup>F\_NMR\_375 MHz]

—87.270  
—88.037

—97.760  
—98.527

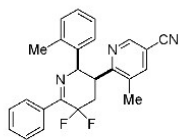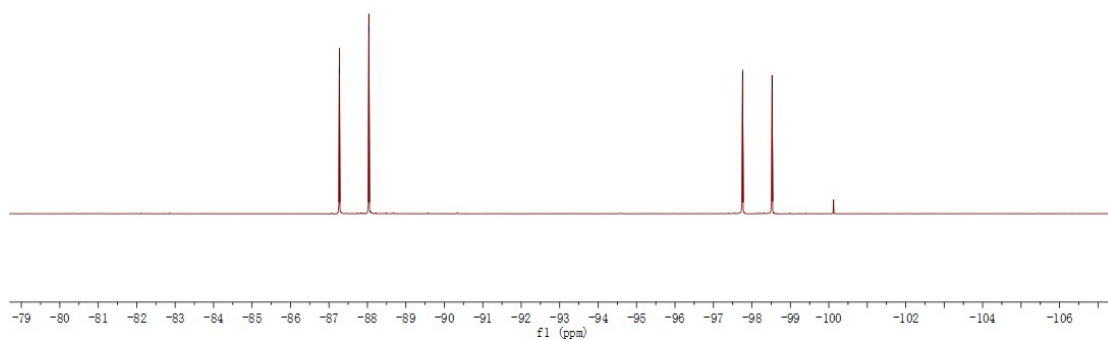

**2'-(3-Chloro-4-fluorophenyl)-5',5'-difluoro-3-methyl-6'-phenyl-2',3',4',5'-tetrahydro-[2,3'-bipyridine]-5-carbonitrile (3ag)**

[<sup>1</sup>H\_NMR\_400 MHz\_(CDCl<sub>3</sub>: 7.26 ppm)]

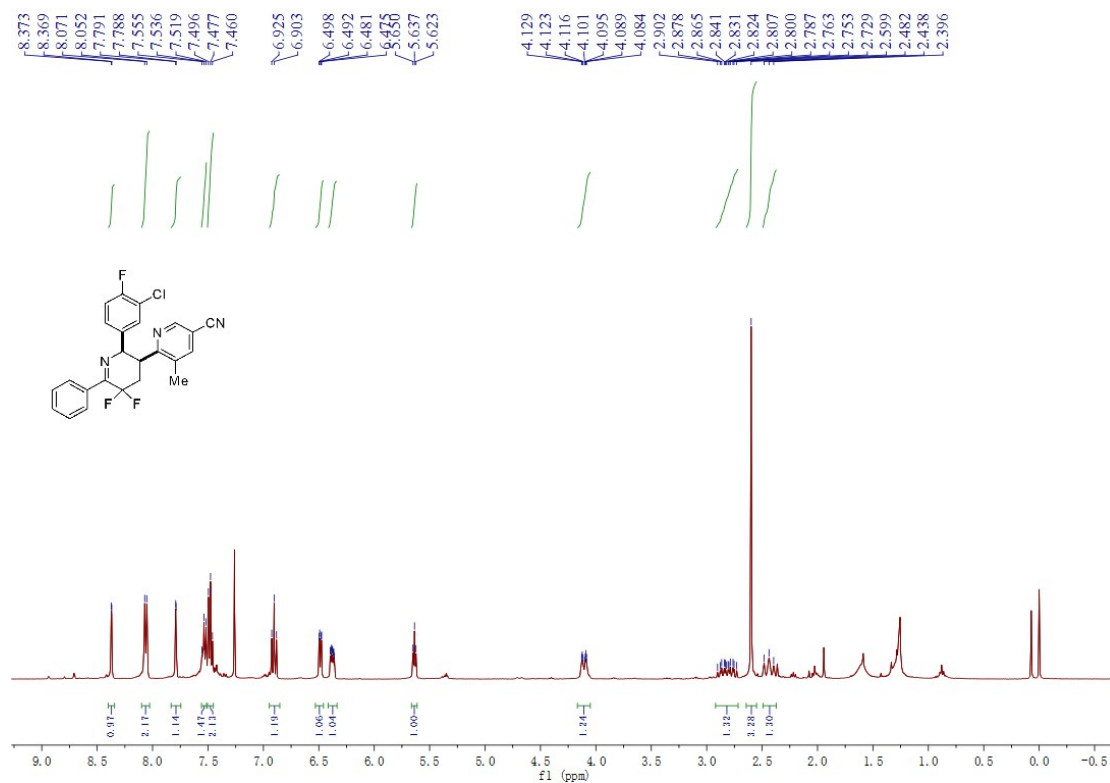

[<sup>13</sup>C\_NMR\_100 MHz\_(CDCl<sub>3</sub>: 77.00 ppm)]

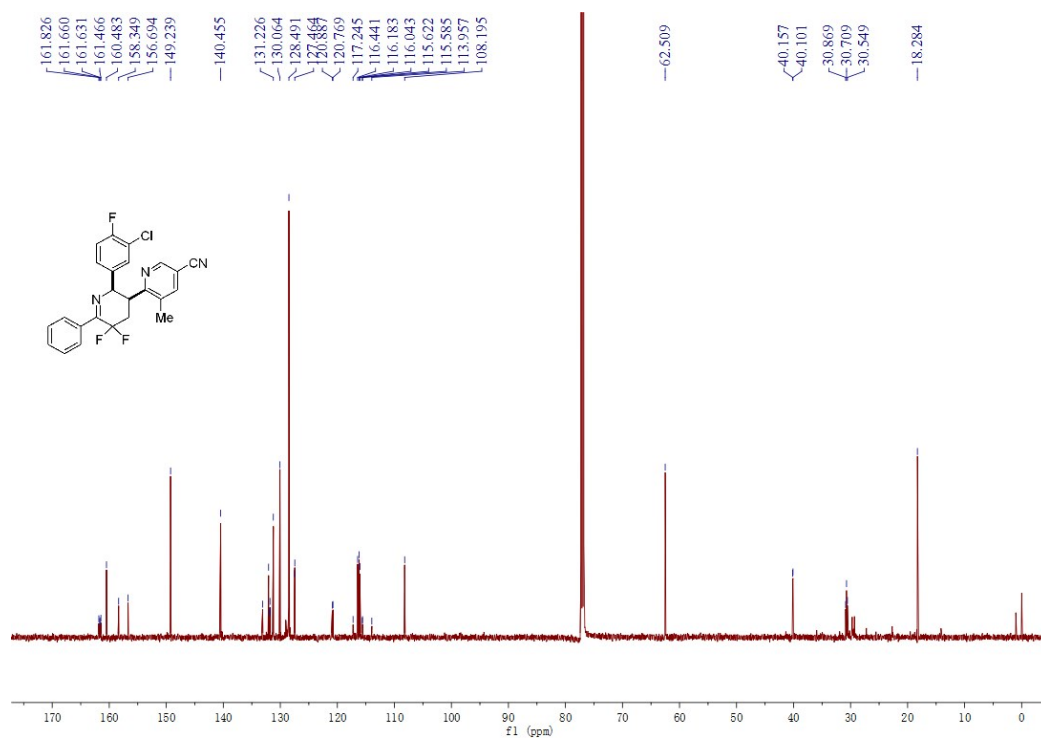

[<sup>19</sup>F\_NMR\_375 MHz]

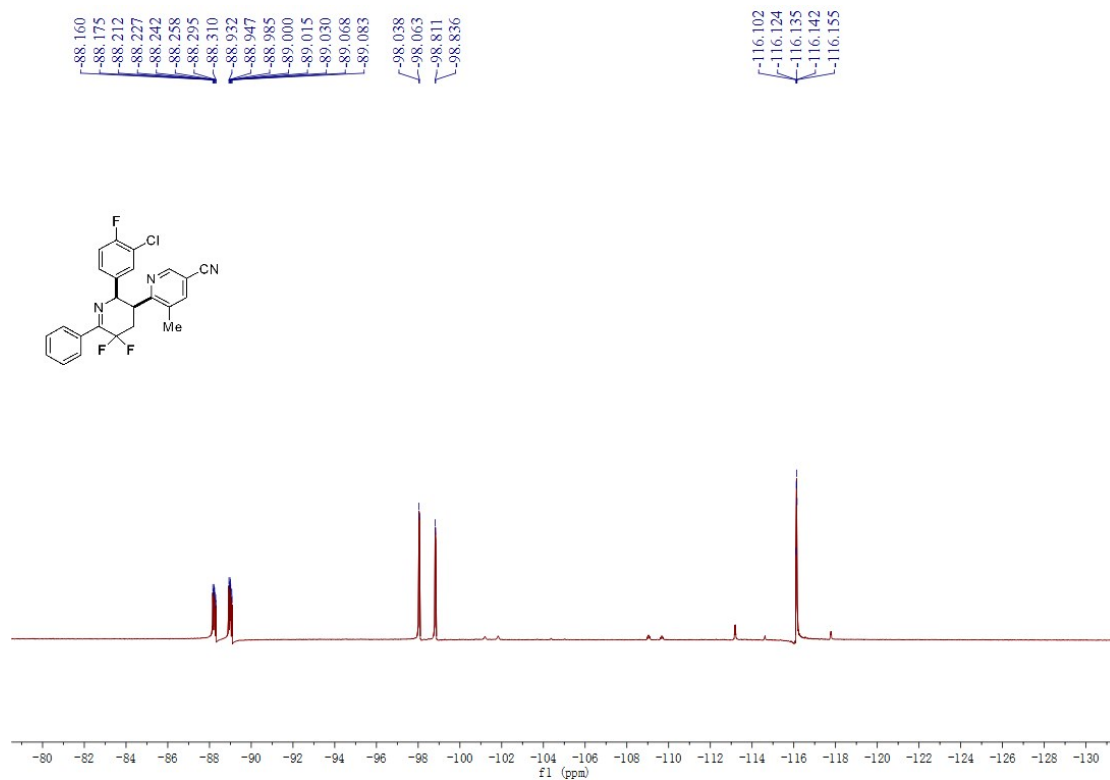

Supplement: d1qo00639h1.pdf [file d1qo00639h1.pdf]
